# Supplementary material for: Identifying geologic characteristics and operational decisions to meet global carbon sequestration goals
Source: Royal Society of Chemistry journal article supplement (doi:10.1039/d0ee02488k), 2020-01-01
Supplement: d0ee02488k1.xlsx [file d0ee02488k1.xlsx]

## Sheet: Figure 2abc
Depth	Pressure	Temp-erature	CO2 density	CO2 viscosity	Injection rate	Plume radius	Plume volume	Storage potential of plume
m	Mpa	°C	kg/m3	Pa*s	MtCO2/yr	km	Mm3	MtCO2/km2	19.6	4.9
1000	9.80665	56	302.515	2.42417e-05	0.325152	3.76288	32.2449	0.219289
1010	9.90472	56	309.636	2.4586e-05	0.329505	3.76803	31.9251	0.221617
1020	10.0028	56	316.95	2.49465e-05	0.333872	3.77324	31.6017	0.223935
1030	10.1008	56	324.462	2.53265e-05	0.338255	3.77851	31.2753	0.226243
1040	10.1989	56	332.168	2.57245e-05	0.342652	3.78383	30.9468	0.228539
1050	10.297	56	340.065	2.61414e-05	0.347063	3.78921	30.6174	0.230825
1060	10.395	56	348.145	2.65782e-05	0.351489	3.79464	30.2882	0.2331
1070	10.4931	56	356.413	2.70343e-05	0.355929	3.80011	29.9593	0.235365
1080	10.5912	56	364.821	2.75098e-05	0.360383	3.80563	29.6351	0.23762
1090	10.6892	56	373.385	2.80047e-05	0.364851	3.81119	29.3143	0.239865
1100	10.7873	56	382.083	2.85183e-05	0.369332	3.81678	28.9988	0.242099
1110	10.8854	56	390.868	2.90493e-05	0.373826	3.82242	28.692	0.244323
1120	10.9834	56	399.767	2.95985e-05	0.378334	3.82809	28.3916	0.246538
1130	11.0815	56	408.68	3.01618e-05	0.382854	3.83378	28.1042	0.248742
1140	11.1796	56	417.622	3.07396e-05	0.387388	3.83951	27.8281	0.250938
1150	11.2776	56	426.576	3.13308e-05	0.391934	3.84526	27.5637	0.253123
1160	11.3757	56	435.443	3.1929e-05	0.396492	3.85104	27.3165	0.255299
1170	11.4738	56	444.275	3.25376e-05	0.401063	3.85684	27.0821	0.257467
1180	11.5718	56	452.978	3.31494e-05	0.405646	3.86266	26.8653	0.259625
1190	11.6699	56	461.546	3.37639e-05	0.410242	3.8685	26.6653	0.261774
1200	11.768	56	469.986	3.43815e-05	0.414849	3.87435	26.4805	0.263914
1210	11.866	56	478.206	3.49943e-05	0.419468	3.88022	26.3151	0.266046
1220	11.9641	56	486.25	3.56063e-05	0.423793	3.88523	26.1466	0.268096
1230	12.0622	56	494.086	3.62128e-05	0.428077	3.88911	25.992	0.270268
1240	12.1602	56	501.702	3.68122e-05	0.432362	3.89306	25.8537	0.272419
1250	12.2583	56	509.108	3.74058e-05	0.43665	3.8971	25.7303	0.27455
1260	12.3564	56	516.277	3.7989e-05	0.440939	3.90122	25.6223	0.276661
1270	12.4544	56	523.221	3.85638e-05	0.445231	3.90542	25.5283	0.278754
1280	12.5525	56	529.944	3.91291e-05	0.449525	3.90969	25.4475	0.280827
1290	12.6506	56	536.449	3.96837e-05	0.453821	3.91404	25.3791	0.282882
1300	12.7486	56	542.735	4.02285e-05	0.458119	3.91845	25.3228	0.28492
1310	12.8467	56	548.821	4.07622e-05	0.462421	3.92292	25.2771	0.286939
1320	12.9448	56	554.701	4.12852e-05	0.466725	3.92746	25.242	0.288941
1330	13.0428	56	560.383	4.17975e-05	0.471031	3.93206	25.2166	0.290926
1340	13.1409	56	565.885	4.22993e-05	0.475341	3.93671	25.1999	0.292894
1350	13.239	56	571.195	4.27905e-05	0.479653	3.94142	25.1921	0.294845
1360	13.337	56	576.348	4.32719e-05	0.483969	3.94618	25.1915	0.296781
1370	13.4351	56	581.334	4.37435e-05	0.488287	3.95098	25.1983	0.298701
1380	13.5332	56	586.158	4.42053e-05	0.492609	3.95584	25.2121	0.300605
1390	13.6312	56	590.838	4.46578e-05	0.496934	3.96074	25.232	0.302495
1400	13.7293	56	595.365	4.51008e-05	0.501264	3.96568	25.2584	0.304371
1410	13.8274	56	599.763	4.55352e-05	0.505634	3.97066	25.2917	0.306254
1420	13.9254	56	604.033	4.59611e-05	0.510057	3.97568	25.3325	0.308153
1430	14.0235	56	608.174	4.63784e-05	0.514572	3.98074	25.3828	0.310092
1440	14.1216	56	612.204	4.6788e-05	0.519161	3.98583	25.4406	0.312059
1450	14.2196	56	616.114	4.71894e-05	0.523798	3.99095	25.5049	0.314038
1460	14.3177	56	619.921	4.75837e-05	0.528481	3.9961	25.5749	0.316029
1470	14.4158	56	623.629	4.79711e-05	0.533206	4.00128	25.6502	0.31803
1480	14.5138	56	627.234	4.83513e-05	0.537973	4.00649	25.7307	0.32004
1490	14.6119	56	630.754	4.87254e-05	0.542778	4.01172	25.8157	0.322057
1500	14.71	56	634.179	4.90929e-05	0.547968	4.01697	25.9218	0.324286
1510	14.808	56	637.52	4.94542e-05	0.553194	4.02225	26.0318	0.326521
1520	14.9061	56	640.784	4.98096e-05	0.558429	4.02754	26.1443	0.328745
1530	15.0042	56	643.964	5.01588e-05	0.563672	4.03285	26.2595	0.330958
1540	15.1022	56	647.075	5.05032e-05	0.568921	4.03818	26.3766	0.333159
1550	15.2003	56	650.111	5.08423e-05	0.574176	4.04352	26.4959	0.335348
1560	15.2984	56	653.078	5.1176e-05	0.579434	4.04886	26.6171	0.337528
1570	15.3964	56	655.983	5.15047e-05	0.584695	4.05274	26.7398	0.33994
1580	15.4945	56	658.823	5.1828e-05	0.589957	4.05667	26.8641	0.342336
1590	15.5926	56	661.609	5.21475e-05	0.595219	4.06064	26.9896	0.344714
1600	15.6906	56	664.337	5.24625e-05	0.600147	4.06465	27.1013	0.346883
1610	15.7887	56	667.009	5.27731e-05	0.604801	4.06869	27.2021	0.348878
1620	15.8868	56	669.626	5.30796e-05	0.609422	4.07278	27.3028	0.350839
1630	15.9848	56	672.189	5.33817e-05	0.614008	4.0769	27.4034	0.352765
1640	16.0829	56	674.705	5.36802e-05	0.61856	4.08106	27.5036	0.354657
1650	16.181	56	677.172	5.39749e-05	0.623074	4.08525	27.6033	0.356512
1660	16.279	56	679.593	5.42658e-05	0.627125	4.08947	27.6838	0.358089
1670	16.3771	56	681.972	5.45531e-05	0.631173	4.09373	27.7654	0.359652
1680	16.4752	56	684.306	5.48368e-05	0.635219	4.09801	27.848	0.3612
1690	16.5732	56	686.6	5.51173e-05	0.63926	4.10233	27.9316	0.362734
1700	16.6713	56	688.852	5.53947e-05	0.643296	4.10667	28.016	0.364252
1710	16.7694	56	691.065	5.56689e-05	0.647394	4.11104	28.1042	0.365793
1720	16.8674	56	693.244	5.59402e-05	0.651627	4.11544	28.1991	0.367399
1730	16.9655	56	695.385	5.62084e-05	0.655833	4.11987	28.2936	0.368976
1740	17.0636	56	697.493	5.64737e-05	0.660009	4.12432	28.3878	0.370525
1750	17.1616	56	699.569	5.67361e-05	0.664158	4.12879	28.4814	0.372047
1760	17.2597	56	701.611	5.69956e-05	0.668278	4.13328	28.5747	0.373541
1770	17.3578	56	703.618	5.72524e-05	0.672369	4.1378	28.6676	0.375008
1780	17.4558	56	705.592	5.75065e-05	0.676432	4.14234	28.7602	0.376448
1790	17.5539	56	707.537	5.77581e-05	0.680466	4.1469	28.8522	0.377861
1800	17.652	56	709.458	5.80073e-05	0.684472	4.15147	28.9435	0.379247
1810	17.75	56	711.351	5.82541e-05	0.68845	4.15607	29.0342	0.380608
1820	17.8481	56	713.216	5.8499e-05	0.692398	4.16068	29.1244	0.381943
1830	17.9462	56	715.053	5.87417e-05	0.696318	4.16531	29.214	0.383252
1840	18.0442	56	716.864	5.8982e-05	0.70021	4.16996	29.303	0.384535
1850	18.1423	56	718.649	5.92198e-05	0.704072	4.17462	29.3915	0.385793
1860	18.2404	56	720.409	5.9455e-05	0.707906	4.1793	29.4794	0.387027
1870	18.3384	56	722.147	5.96888e-05	0.711711	4.18399	29.5665	0.388235
1880	18.4365	56	723.862	5.99208e-05	0.715487	4.18869	29.6529	0.389419
1890	18.5346	56	725.555	6.01508e-05	0.71926	4.1934	29.7397	0.390593
1900	18.6326	56	727.227	6.03788e-05	0.723158	4.19813	29.8321	0.391826
1910	18.7307	56	728.878	6.06048e-05	0.727032	4.20287	29.924	0.393037
1920	18.8288	56	730.507	6.08289e-05	0.730882	4.20796	30.0154	0.394162
1930	18.9268	56	732.115	6.10513e-05	0.734709	4.21318	30.1063	0.395245
1940	19.0249	56	733.701	6.12719e-05	0.738512	4.21838	30.1967	0.396312
1950	19.123	56	735.269	6.14909e-05	0.742292	4.22357	30.2865	0.397363
1960	19.221	56	736.817	6.17081e-05	0.746048	4.22874	30.3758	0.398397
1970	19.3191	56	738.348	6.19237e-05	0.749779	4.23389	30.4645	0.399416
1980	19.4172	56	739.863	6.21376e-05	0.753788	4.23903	30.5646	0.400579
1990	19.5152	56	741.362	6.23499e-05	0.757813	4.24415	30.6657	0.401747
2000	19.6133	56	742.843	6.25607e-05	0.761838	4.24925	30.7671	0.402911
2010	19.7114	56	744.308	6.277e-05	0.765863	4.25434	30.8688	0.404071
2020	19.8094	56	745.755	6.29779e-05	0.769886	4.25941	30.9707	0.405228
2030	19.9075	56	747.186	6.31844e-05	0.773909	4.26446	31.0729	0.406381
2040	20.0056	56	748.6	6.33896e-05	0.777931	4.26951	31.1754	0.407527
2050	20.1036	56	750	6.35931e-05	0.781952	4.27452	31.2781	0.408673
2060	20.2017	56	751.384	6.37951e-05	0.785972	4.27952	31.381	0.409816
2070	20.2998	56	752.754	6.39959e-05	0.789992	4.28449	31.4841	0.410957
2080	20.3978	56	754.111	6.41958e-05	0.794011	4.28943	31.5873	0.412096
2090	20.4959	56	755.454	6.43947e-05	0.798029	4.29435	31.6907	0.413232
2100	20.594	56	756.783	6.4592e-05	0.802046	4.29925	31.7943	0.414367
2110	20.692	56	758.099	6.47879e-05	0.806063	4.30412	31.8981	0.415501
2120	20.7901	56	759.401	6.49825e-05	0.810079	4.30897	32.0021	0.416632
2130	20.8882	56	760.688	6.51759e-05	0.814095	4.31379	32.1062	0.417762
2140	20.9862	56	761.962	6.53681e-05	0.81811	4.31858	32.2106	0.418891
2150	21.0843	56	763.227	6.55593e-05	0.822124	4.32335	32.3151	0.420019
2160	21.1824	56	764.481	6.57495e-05	0.826137	4.32809	32.4195	0.421145
2170	21.2804	56	765.724	6.59386e-05	0.83015	4.3328	32.5241	0.42227
2180	21.3785	56	766.954	6.61266e-05	0.834163	4.33749	32.6289	0.423394
2190	21.4766	56	768.171	6.63135e-05	0.838174	4.34215	32.7339	0.424517
2200	21.5746	56	769.378	6.64993e-05	0.842186	4.34679	32.839	0.42564
2210	21.6727	56	770.574	6.66841e-05	0.846196	4.3514	32.9441	0.426762
2220	21.7708	56	771.76	6.68678e-05	0.850206	4.35597	33.0494	0.427883
2230	21.8688	56	772.935	6.70504e-05	0.854215	4.36053	33.1547	0.429004
2240	21.9669	56	774.099	6.7232e-05	0.858224	4.36505	33.2602	0.430124
2250	22.065	56	775.253	6.74128e-05	0.862232	4.36954	33.3658	0.431244
2260	22.163	56	776.396	6.75929e-05	0.86624	4.37401	33.4716	0.432364
2270	22.2611	56	777.528	6.77722e-05	0.870247	4.37845	33.5774	0.433484
2280	22.3592	56	778.655	6.79502e-05	0.874253	4.38286	33.6832	0.434604
2290	22.4572	56	779.774	6.81272e-05	0.878259	4.38724	33.789	0.435724
2300	22.5553	56	780.883	6.83033e-05	0.882265	4.39159	33.8949	0.436845
2310	22.6534	56	781.98	6.84788e-05	0.88627	4.39591	34.001	0.437965
2320	22.7514	56	783.066	6.86535e-05	0.890274	4.4002	34.1073	0.439086
2330	22.8495	56	784.146	6.88275e-05	0.894278	4.40446	34.2134	0.440208
2340	22.9476	56	785.219	6.90007e-05	0.898654	4.4087	34.3339	0.441513
2350	23.0456	56	786.284	6.9173e-05	0.903145	4.4129	34.4588	0.442875
2360	23.1437	56	787.338	6.93443e-05	0.90764	4.41707	34.5839	0.444239
2370	23.2418	56	788.383	6.95147e-05	0.91214	4.42121	34.7093	0.445606
2380	23.3398	56	789.418	6.96844e-05	0.916643	4.42532	34.8349	0.446974
2390	23.4379	56	790.445	6.98534e-05	0.92115	4.42934	34.9607	0.448358
2400	23.536	56	791.464	7.00217e-05	0.925662	4.43258	35.0867	0.449895
2410	23.634	56	792.478	7.01894e-05	0.930177	4.43583	35.2127	0.451427
2420	23.7321	56	793.487	7.03565e-05	0.934696	4.43909	35.3388	0.452955
2430	23.8302	56	794.487	7.05226e-05	0.939219	4.44235	35.4651	0.454478
2440	23.9282	56	795.479	7.06877e-05	0.943746	4.44562	35.5916	0.455997
2450	24.0263	56	796.464	7.0852e-05	0.948276	4.4489	35.7183	0.457511
2460	24.1244	56	797.444	7.10159e-05	0.952811	4.45218	35.8449	0.459021
2470	24.2224	56	798.417	7.11792e-05	0.957349	4.45547	35.9717	0.460526
2480	24.3205	56	799.383	7.13419e-05	0.96189	4.45877	36.0987	0.462027
2490	24.4186	56	800.341	7.15039e-05	0.966435	4.46207	36.2259	0.463524
2500	24.5166	56	801.29	7.16653e-05	0.970984	4.46537	36.3532	0.465016
2510	24.6147	56	802.233	7.18261e-05	0.975536	4.46868	36.4808	0.466504
2520	24.7128	56	803.167	7.19863e-05	0.980091	4.472	36.6085	0.467987
2530	24.8108	56	804.097	7.21459e-05	0.98465	4.47532	36.7362	0.469467
2540	24.9089	56	805.023	7.23049e-05	0.989212	4.47865	36.864	0.470941
2550	25.007	56	805.945	7.24632e-05	0.993778	4.48198	36.9918	0.472412
2560	25.105	56	806.857	7.26206e-05	0.998347	4.48531	37.1199	0.473879
2570	25.2031	56	807.76	7.27773e-05	1.00292	4.48849	37.2481	0.475376
2580	25.3012	56	808.659	7.29335e-05	1.00749	4.49158	37.3765	0.476887
2590	25.3992	56	809.555	7.30893e-05	1.01207	4.49469	37.5048	0.478391
2600	25.4973	56	810.445	7.32447e-05	1.01665	4.49782	37.6332	0.479889
2610	25.5954	56	811.329	7.33996e-05	1.02124	4.50097	37.7617	0.481379
2620	25.6934	56	812.207	7.35541e-05	1.02583	4.50413	37.8904	0.482862
2630	25.7915	56	813.078	7.37079e-05	1.03042	4.50731	38.0191	0.484339
2640	25.8896	56	813.943	7.38608e-05	1.03501	4.51051	38.1481	0.485809
2650	25.9876	56	814.802	7.40129e-05	1.03961	4.51372	38.2771	0.487272
2660	26.0857	56	815.657	7.41649e-05	1.04425	4.51695	38.4078	0.488751
2670	26.1838	56	816.508	7.43166e-05	1.04899	4.52018	38.5417	0.490263
2680	26.2818	56	817.354	7.4468e-05	1.05372	4.52343	38.6756	0.491768
2690	26.3799	56	818.196	7.46185e-05	1.05846	4.5267	38.8095	0.493267
2700	26.478	56	819.033	7.47684e-05	1.0632	4.52998	38.9435	0.494759
2710	26.576	56	819.863	7.49179e-05	1.06794	4.53327	39.0776	0.496244
2720	26.6741	56	820.687	7.50669e-05	1.07227	4.53659	39.1967	0.497528
2730	26.7722	56	821.505	7.52155e-05	1.07647	4.53993	39.3109	0.49874
2740	26.8702	56	822.319	7.53637e-05	1.08065	4.54328	39.4246	0.499941
2750	26.9683	56	823.129	7.55113e-05	1.08482	4.54664	39.5378	0.50113
2760	27.0664	56	823.934	7.56584e-05	1.08899	4.55001	39.6507	0.502307
2770	27.1644	56	824.735	7.58048e-05	1.09314	4.55339	39.7631	0.503473
2780	27.2625	56	825.531	7.59506e-05	1.09727	4.55677	39.8752	0.504628
2790	27.3606	56	826.326	7.60963e-05	1.1014	4.56017	39.9867	0.505771
2800	27.4586	56	827.117	7.62417e-05	1.10552	4.56358	40.0977	0.506903
2810	27.5567	56	827.902	7.63867e-05	1.10962	4.56699	40.2084	0.508025
2820	27.6548	56	828.68	7.65312e-05	1.11371	4.57041	40.3188	0.509135
2830	27.7528	56	829.452	7.66751e-05	1.11779	4.57384	40.4289	0.510235
2840	27.8509	56	830.223	7.68187e-05	1.12186	4.57728	40.5384	0.511325
2850	27.949	56	830.991	7.69617e-05	1.12592	4.58072	40.6474	0.512403
2860	28.047	56	831.755	7.71044e-05	1.12997	4.58417	40.7561	0.513472
2870	28.1451	56	832.514	7.72469e-05	1.134	4.58762	40.8644	0.51453
2880	28.2432	56	833.268	7.73891e-05	1.13803	4.59106	40.9723	0.515583
2890	28.3412	56	834.017	7.75307e-05	1.14204	4.59449	41.0798	0.516628
2900	28.4393	56	834.761	7.76718e-05	1.14604	4.59793	41.187	0.517664
2910	28.5374	56	835.502	7.78125e-05	1.15003	4.60136	41.2937	0.518691
2920	28.6354	56	836.241	7.79527e-05	1.15401	4.6048	41.4	0.519708
2930	28.7335	56	836.976	7.80925e-05	1.15798	4.60824	41.5058	0.520717
2940	28.8316	56	837.707	7.8232e-05	1.16194	4.61168	41.6113	0.521716
2950	28.9296	56	838.432	7.83713e-05	1.16588	4.61513	41.7164	0.522707
2960	29.0277	56	839.154	7.85102e-05	1.16981	4.61857	41.8212	0.523689
2970	29.1258	56	839.873	7.86488e-05	1.17373	4.62201	41.9254	0.524662
2980	29.2238	56	840.589	7.87871e-05	1.17765	4.62545	42.0293	0.525627
2990	29.3219	56	841.302	7.89249e-05	1.18154	4.62889	42.1327	0.526584
3000	29.42	56	842.013	7.90623e-05	1.18543	4.63233	42.2357	0.527532

## Sheet: Figure 2def
Depth	Pressure	Temp-erature	CO2 density	CO2 viscosity	Injection rate	Plume radius	Plume volume	Storage potential of plume
m	Mpa	°C	kg/m3	Pa*s	MtCO2/yr	km	Mm3	MtCO2/km2	19.6	4.9
2000	19.6133	21	930.242	9.94032e-05	0.617607	3.75671	19.9176	0.417895
2000	19.6133	21.2	929.33	9.91469e-05	0.618271	3.75936	19.9586	0.417756
2000	19.6133	21.4	928.418	9.88906e-05	0.618937	3.76201	19.9997	0.417617
2000	19.6133	21.6	927.503	9.86349e-05	0.619603	3.76465	20.041	0.417479
2000	19.6133	21.8	926.587	9.83799e-05	0.62027	3.76731	20.0824	0.417341
2000	19.6133	22	925.67	9.81248e-05	0.620939	3.76996	20.124	0.417202
2000	19.6133	22.2	924.749	9.78718e-05	0.621608	3.77261	20.1657	0.417065
2000	19.6133	22.4	923.827	9.76188e-05	0.622278	3.77527	20.2076	0.416927
2000	19.6133	22.6	922.904	9.73664e-05	0.62295	3.77793	20.2497	0.41679
2000	19.6133	22.8	921.98	9.71145e-05	0.623622	3.78059	20.2918	0.416652
2000	19.6133	23	921.055	9.68627e-05	0.624295	3.78325	20.3341	0.416515
2000	19.6133	23.2	920.126	9.66129e-05	0.624969	3.78591	20.3766	0.416379
2000	19.6133	23.4	919.198	9.63631e-05	0.625645	3.78858	20.4193	0.416242
2000	19.6133	23.6	918.267	9.61138e-05	0.626321	3.79125	20.4621	0.416106
2000	19.6133	23.8	917.335	9.58652e-05	0.626998	3.79392	20.505	0.41597
2000	19.6133	24	916.402	9.56165e-05	0.627677	3.79659	20.5481	0.415834
2000	19.6133	24.2	915.466	9.53698e-05	0.628356	3.79926	20.5914	0.415698
2000	19.6133	24.4	914.529	9.51231e-05	0.629036	3.80194	20.6348	0.415563
2000	19.6133	24.6	913.591	9.48771e-05	0.629718	3.80462	20.6783	0.415428
2000	19.6133	24.8	912.651	9.46318e-05	0.6304	3.8073	20.7221	0.415293
2000	19.6133	25	911.71	9.43865e-05	0.631083	3.80998	20.7659	0.415158
2000	19.6133	25.2	910.766	9.41427e-05	0.631767	3.81266	20.81	0.415024
2000	19.6133	25.4	909.822	9.38988e-05	0.632453	3.81534	20.8542	0.414889
2000	19.6133	25.6	908.875	9.36557e-05	0.633139	3.81803	20.8985	0.414755
2000	19.6133	25.8	907.927	9.34135e-05	0.633826	3.82072	20.9431	0.414621
2000	19.6133	26	906.978	9.31713e-05	0.634515	3.82341	20.9878	0.414487
2000	19.6133	26.2	906.029	9.29307e-05	0.635204	3.8261	21.0326	0.414354
2000	19.6133	26.4	905.08	9.26902e-05	0.635894	3.8288	21.0775	0.414221
2000	19.6133	26.6	904.127	9.24503e-05	0.636585	3.83149	21.1227	0.414088
2000	19.6133	26.8	903.171	9.22112e-05	0.637278	3.83419	21.168	0.413955
2000	19.6133	27	902.214	9.1972e-05	0.637971	3.83689	21.2135	0.413822
2000	19.6133	27.2	901.255	9.17343e-05	0.638665	3.83959	21.2592	0.41369
2000	19.6133	27.4	900.296	9.14966e-05	0.639361	3.8423	21.305	0.413557
2000	19.6133	27.6	899.335	9.12597e-05	0.640057	3.845	21.351	0.413425
2000	19.6133	27.8	898.37	9.10235e-05	0.640754	3.84771	21.3972	0.413293
2000	19.6133	28	897.406	9.07872e-05	0.641452	3.85042	21.4436	0.413162
2000	19.6133	28.2	896.438	9.05522e-05	0.642152	3.85313	21.4901	0.41303
2000	19.6133	28.4	895.469	9.03172e-05	0.642852	3.85584	21.5368	0.412899
2000	19.6133	28.6	894.497	9.0083e-05	0.643553	3.85856	21.5837	0.412768
2000	19.6133	28.8	893.522	8.98496e-05	0.644255	3.86128	21.6309	0.412637
2000	19.6133	29	892.547	8.96162e-05	0.644959	3.86399	21.6781	0.412506
2000	19.6133	29.2	891.571	8.93844e-05	0.645663	3.86672	21.7256	0.412375
2000	19.6133	29.4	890.595	8.91526e-05	0.646368	3.86944	21.7731	0.412245
2000	19.6133	29.6	889.616	8.89214e-05	0.647074	3.87216	21.8209	0.412115
2000	19.6133	29.8	888.637	8.86908e-05	0.647782	3.87489	21.8688	0.411985
2000	19.6133	30	887.657	8.84602e-05	0.64849	3.87762	21.9169	0.411855
2000	19.6133	30.2	886.67	8.82309e-05	0.649199	3.88035	21.9653	0.411725
2000	19.6133	30.4	885.683	8.80016e-05	0.649909	3.88308	22.0138	0.411596
2000	19.6133	30.6	884.694	8.77731e-05	0.65062	3.88582	22.0625	0.411467
2000	19.6133	30.8	883.705	8.75453e-05	0.651333	3.88855	22.1114	0.411338
2000	19.6133	31	882.716	8.73175e-05	0.652046	3.89129	22.1604	0.411209
2000	19.6133	31.2	881.721	8.70909e-05	0.65276	3.89403	22.2097	0.41108
2000	19.6133	31.4	880.726	8.68643e-05	0.653475	3.89677	22.2592	0.410951
2000	19.6133	31.6	879.729	8.66385e-05	0.654192	3.89952	22.3089	0.410823
2000	19.6133	31.8	878.73	8.64135e-05	0.654909	3.90226	22.3587	0.410695
2000	19.6133	32	877.731	8.61886e-05	0.655627	3.90501	22.4087	0.410567
2000	19.6133	32.2	876.727	8.59648e-05	0.656346	3.90776	22.459	0.410439
2000	19.6133	32.4	875.723	8.57409e-05	0.657066	3.91051	22.5094	0.410311
2000	19.6133	32.6	874.717	8.55178e-05	0.657788	3.91327	22.56	0.410184
2000	19.6133	32.8	873.709	8.52954e-05	0.65851	3.91602	22.6108	0.410056
2000	19.6133	33	872.701	8.50729e-05	0.659233	3.91878	22.6618	0.409929
2000	19.6133	33.2	871.689	8.48515e-05	0.659957	3.92154	22.713	0.409802
2000	19.6133	33.4	870.678	8.46301e-05	0.660682	3.9243	22.7644	0.409675
2000	19.6133	33.6	869.662	8.44093e-05	0.661409	3.92706	22.8161	0.409549
2000	19.6133	33.8	868.643	8.41893e-05	0.662136	3.92983	22.8679	0.409422
2000	19.6133	34	867.624	8.39692e-05	0.662864	3.9326	22.92	0.409296
2000	19.6133	34.2	866.601	8.37506e-05	0.663593	3.93536	22.9723	0.40917
2000	19.6133	34.4	865.579	8.3532e-05	0.664323	3.93814	23.0247	0.409044
2000	19.6133	34.6	864.554	8.33141e-05	0.665054	3.94091	23.0774	0.408918
2000	19.6133	34.8	863.527	8.30969e-05	0.665787	3.94368	23.1303	0.408792
2000	19.6133	35	862.5	8.28797e-05	0.66652	3.94646	23.1833	0.408666
2000	19.6133	35.2	861.469	8.26635e-05	0.667254	3.94924	23.2366	0.408541
2000	19.6133	35.4	860.439	8.24473e-05	0.667989	3.95202	23.2901	0.408416
2000	19.6133	35.6	859.406	8.22316e-05	0.668725	3.9548	23.3438	0.40829
2000	19.6133	35.8	858.37	8.20162e-05	0.669462	3.95759	23.3977	0.408166
2000	19.6133	36	857.335	8.18009e-05	0.670201	3.96038	23.4518	0.408041
2000	19.6133	36.2	856.292	8.15873e-05	0.67094	3.96316	23.5062	0.407916
2000	19.6133	36.4	855.249	8.13736e-05	0.67168	3.96595	23.5609	0.407792
2000	19.6133	36.6	854.204	8.11605e-05	0.672421	3.96875	23.6157	0.407667
2000	19.6133	36.8	853.158	8.09479e-05	0.673163	3.97154	23.6708	0.407543
2000	19.6133	37	852.111	8.07354e-05	0.673906	3.97434	23.726	0.407419
2000	19.6133	37.2	851.061	8.05241e-05	0.674651	3.97714	23.7815	0.407295
2000	19.6133	37.4	850.011	8.03129e-05	0.675396	3.97994	23.8372	0.407171
2000	19.6133	37.6	848.956	8.01022e-05	0.676142	3.98274	23.8932	0.407048
2000	19.6133	37.8	847.897	7.9892e-05	0.676889	3.98555	23.9494	0.406924
2000	19.6133	38	846.838	7.96819e-05	0.677637	3.98835	24.0059	0.406801
2000	19.6133	38.2	845.776	7.9473e-05	0.678386	3.99116	24.0626	0.406677
2000	19.6133	38.4	844.713	7.92642e-05	0.679136	3.99397	24.1195	0.406554
2000	19.6133	38.6	843.649	7.90557e-05	0.679888	3.99678	24.1767	0.406431
2000	19.6133	38.8	842.583	7.88476e-05	0.68064	3.9996	24.234	0.406309
2000	19.6133	39	841.517	7.86395e-05	0.681393	4.00241	24.2916	0.406186
2000	19.6133	39.2	840.446	7.8433e-05	0.682147	4.00523	24.3495	0.406063
2000	19.6133	39.4	839.376	7.82264e-05	0.682902	4.00805	24.4075	0.405941
2000	19.6133	39.6	838.301	7.80204e-05	0.683658	4.01088	24.4658	0.405819
2000	19.6133	39.8	837.222	7.78149e-05	0.684415	4.0137	24.5245	0.405697
2000	19.6133	40	836.144	7.76094e-05	0.685173	4.01653	24.5833	0.405575
2000	19.6133	40.2	835.063	7.74049e-05	0.685933	4.01935	24.6424	0.405453
2000	19.6133	40.4	833.982	7.72004e-05	0.686693	4.02218	24.7017	0.405331
2000	19.6133	40.6	832.899	7.69965e-05	0.687454	4.02502	24.7612	0.405209
2000	19.6133	40.8	831.813	7.67931e-05	0.688216	4.02785	24.8211	0.405088
2000	19.6133	41	830.727	7.65897e-05	0.688979	4.03069	24.8811	0.404966
2000	19.6133	41.2	829.632	7.63877e-05	0.689743	4.03353	24.9415	0.404845
2000	19.6133	41.4	828.538	7.61857e-05	0.690508	4.03637	25.0022	0.404724
2000	19.6133	41.6	827.442	7.59843e-05	0.691274	4.03921	25.0631	0.404603
2000	19.6133	41.8	826.345	7.57833e-05	0.692041	4.04205	25.1242	0.404482
2000	19.6133	42	825.247	7.55823e-05	0.692809	4.0449	25.1855	0.404361
2000	19.6133	42.2	824.142	7.53824e-05	0.693579	4.04775	25.2473	0.404241
2000	19.6133	42.4	823.037	7.51825e-05	0.694349	4.0506	25.3093	0.40412
2000	19.6133	42.6	821.931	7.49831e-05	0.69512	4.05345	25.3715	0.404
2000	19.6133	42.8	820.824	7.47841e-05	0.695892	4.0563	25.4339	0.40388
2000	19.6133	43	819.717	7.45851e-05	0.696665	4.05916	25.4965	0.40376
2000	19.6133	43.2	818.601	7.43872e-05	0.697439	4.06202	25.5597	0.403639
2000	19.6133	43.4	817.485	7.41893e-05	0.698214	4.06488	25.623	0.40352
2000	19.6133	43.6	816.368	7.39921e-05	0.69899	4.06774	25.6866	0.4034
2000	19.6133	43.8	815.25	7.37955e-05	0.699767	4.07061	25.7504	0.40328
2000	19.6133	44	814.132	7.3599e-05	0.700545	4.07347	25.8144	0.40316
2000	19.6133	44.2	813.007	7.34034e-05	0.701324	4.07634	25.8789	0.403041
2000	19.6133	44.4	811.883	7.32078e-05	0.702104	4.07921	25.9436	0.402922
2000	19.6133	44.6	810.755	7.30126e-05	0.702885	4.08208	26.0085	0.402802
2000	19.6133	44.8	809.625	7.28178e-05	0.703667	4.08496	26.0738	0.402683
2000	19.6133	45	808.495	7.26231e-05	0.704451	4.08784	26.1393	0.402564
2000	19.6133	45.2	807.358	7.24298e-05	0.705235	4.09071	26.2053	0.402445
2000	19.6133	45.4	806.221	7.22365e-05	0.70602	4.09359	26.2714	0.402326
2000	19.6133	45.6	805.083	7.20434e-05	0.706806	4.09648	26.3379	0.402208
2000	19.6133	45.8	803.942	7.18507e-05	0.707593	4.09936	26.4046	0.402089
2000	19.6133	46	802.801	7.1658e-05	0.708381	4.10225	26.4716	0.401971
2000	19.6133	46.2	801.656	7.14668e-05	0.70917	4.10514	26.5389	0.401852
2000	19.6133	46.4	800.512	7.12757e-05	0.70996	4.10803	26.6065	0.401734
2000	19.6133	46.6	799.363	7.10848e-05	0.710751	4.11092	26.6744	0.401616
2000	19.6133	46.8	798.211	7.08944e-05	0.711543	4.11382	26.7427	0.401498
2000	19.6133	47	797.059	7.0704e-05	0.712336	4.11671	26.8112	0.40138
2000	19.6133	47.2	795.899	7.05145e-05	0.71313	4.11961	26.8802	0.401262
2000	19.6133	47.4	794.739	7.0325e-05	0.713925	4.12251	26.9494	0.401144
2000	19.6133	47.6	793.578	7.0136e-05	0.714721	4.12541	27.0189	0.401026
2000	19.6133	47.8	792.417	6.99475e-05	0.715518	4.12832	27.0887	0.400909
2000	19.6133	48	791.255	6.97591e-05	0.716316	4.13123	27.1587	0.400791
2000	19.6133	48.2	790.087	6.95719e-05	0.717115	4.13414	27.2292	0.400674
2000	19.6133	48.4	788.918	6.93847e-05	0.717915	4.13705	27.3	0.400556
2000	19.6133	48.6	787.747	6.91979e-05	0.718716	4.13996	27.3711	0.400439
2000	19.6133	48.8	786.571	6.90115e-05	0.719518	4.14288	27.4426	0.400322
2000	19.6133	49	785.396	6.8825e-05	0.720321	4.14579	27.5143	0.400205
2000	19.6133	49.2	784.215	6.86395e-05	0.721125	4.14871	27.5865	0.400088
2000	19.6133	49.4	783.034	6.8454e-05	0.72193	4.15163	27.659	0.399971
2000	19.6133	49.6	781.852	6.82691e-05	0.722753	4.15456	27.7323	0.399863
2000	19.6133	49.8	780.668	6.80847e-05	0.723852	4.15748	27.8167	0.399908
2000	19.6133	50	779.483	6.79003e-05	0.724957	4.16041	27.9015	0.399955
2000	19.6133	50.2	778.292	6.77171e-05	0.726068	4.16334	27.987	0.400005
2000	19.6133	50.4	777.101	6.75339e-05	0.727185	4.16627	28.073	0.400056
2000	19.6133	50.6	775.908	6.73511e-05	0.728308	4.16921	28.1596	0.40011
2000	19.6133	50.8	774.712	6.71687e-05	0.729436	4.17214	28.2467	0.400166
2000	19.6133	51	773.515	6.69862e-05	0.73057	4.17508	28.3344	0.400225
2000	19.6133	51.2	772.312	6.68048e-05	0.731711	4.17802	28.4229	0.400286
2000	19.6133	51.4	771.108	6.66233e-05	0.732857	4.18096	28.5118	0.400349
2000	19.6133	51.6	769.903	6.64424e-05	0.734009	4.18391	28.6013	0.400414
2000	19.6133	51.8	768.696	6.6262e-05	0.735166	4.18685	28.6914	0.400481
2000	19.6133	52	767.489	6.60815e-05	0.73633	4.1898	28.782	0.400551
2000	19.6133	52.2	766.277	6.59021e-05	0.7375	4.19275	28.8733	0.400622
2000	19.6133	52.4	765.065	6.57226e-05	0.738675	4.1957	28.9652	0.400696
2000	19.6133	52.6	763.849	6.55437e-05	0.739856	4.19866	29.0577	0.400772
2000	19.6133	52.8	762.63	6.53653e-05	0.741043	4.20161	29.1508	0.400851
2000	19.6133	53	761.411	6.51869e-05	0.742236	4.20457	29.2445	0.400931
2000	19.6133	53.2	760.186	6.50094e-05	0.743435	4.20753	29.3389	0.401014
2000	19.6133	53.4	758.96	6.48319e-05	0.744639	4.2105	29.4339	0.401098
2000	19.6133	53.6	757.733	6.46548e-05	0.74585	4.21346	29.5295	0.401185
2000	19.6133	53.8	756.506	6.44781e-05	0.747066	4.21643	29.6257	0.401274
2000	19.6133	54	755.278	6.43014e-05	0.748288	4.2194	29.7224	0.401365
2000	19.6133	54.2	754.043	6.41258e-05	0.749516	4.22237	29.8199	0.401458
2000	19.6133	54.4	752.808	6.39502e-05	0.750835	4.22534	29.9214	0.401599
2000	19.6133	54.6	751.569	6.37752e-05	0.752211	4.22832	30.0256	0.401768
2000	19.6133	54.8	750.326	6.36008e-05	0.753586	4.23129	30.1303	0.401937
2000	19.6133	55	749.083	6.34264e-05	0.754961	4.23427	30.2354	0.402104
2000	19.6133	55.2	747.838	6.32528e-05	0.756337	4.23725	30.341	0.40227
2000	19.6133	55.4	746.592	6.30793e-05	0.757712	4.24023	30.4468	0.402435
2000	19.6133	55.6	745.344	6.29061e-05	0.759088	4.24324	30.5532	0.402595
2000	19.6133	55.8	744.094	6.27334e-05	0.760463	4.24624	30.66	0.402754
2000	19.6133	56	742.843	6.25607e-05	0.761838	4.24925	30.7671	0.402911
2000	19.6133	56.2	741.584	6.23888e-05	0.763214	4.25226	30.875	0.403067
2000	19.6133	56.4	740.325	6.2217e-05	0.764589	4.25528	30.9832	0.403222
2000	19.6133	56.6	739.067	6.20457e-05	0.765965	4.25829	31.0918	0.403376
2000	19.6133	56.8	737.808	6.1875e-05	0.76734	4.26131	31.2008	0.403528
2000	19.6133	57	736.55	6.17043e-05	0.768716	4.26433	31.3101	0.403679
2000	19.6133	57.2	735.28	6.15347e-05	0.770091	4.26735	31.4203	0.403829
2000	19.6133	57.4	734.01	6.13651e-05	0.771466	4.27037	31.5309	0.403977
2000	19.6133	57.6	732.74	6.11959e-05	0.772842	4.2734	31.6418	0.404125
2000	19.6133	57.8	731.47	6.10271e-05	0.774217	4.27642	31.7532	0.404271
2000	19.6133	58	730.2	6.08584e-05	0.775593	4.27945	31.865	0.404416
2000	19.6133	58.2	728.922	6.06905e-05	0.776968	4.28273	31.9774	0.404514
2000	19.6133	58.4	727.644	6.05225e-05	0.778343	4.28609	32.0903	0.404594
2000	19.6133	58.6	726.364	6.03553e-05	0.779719	4.28946	32.2036	0.404672
2000	19.6133	58.8	725.082	6.01886e-05	0.781094	4.29283	32.3175	0.40475
2000	19.6133	59	723.799	6.0022e-05	0.78247	4.29621	32.4318	0.404826
2000	19.6133	59.2	722.514	5.98562e-05	0.783845	4.29958	32.5466	0.404901
2000	19.6133	59.4	721.229	5.96905e-05	0.78522	4.30296	32.6618	0.404975
2000	19.6133	59.6	719.941	5.95253e-05	0.786596	4.30634	32.7775	0.405047
2000	19.6133	59.8	718.651	5.93606e-05	0.787971	4.30973	32.8938	0.405118
2000	19.6133	60	717.36	5.91959e-05	0.789347	4.31312	33.0105	0.405188
2000	19.6133	60.2	716.063	5.9032e-05	0.790722	4.31651	33.1279	0.405257
2000	19.6133	60.4	714.766	5.88681e-05	0.792097	4.3199	33.2457	0.405325
2000	19.6133	60.6	713.468	5.87047e-05	0.793473	4.32329	33.364	0.405391
2000	19.6133	60.8	712.17	5.85419e-05	0.794848	4.32669	33.4828	0.405456
2000	19.6133	61	710.872	5.83792e-05	0.796224	4.33009	33.602	0.40552
2000	19.6133	61.2	709.566	5.82176e-05	0.797599	4.33349	33.722	0.405583
2000	19.6133	61.4	708.261	5.8056e-05	0.798974	4.3369	33.8424	0.405644
2000	19.6133	61.6	706.954	5.78948e-05	0.80035	4.34031	33.9633	0.405705
2000	19.6133	61.8	705.645	5.77341e-05	0.801725	4.34372	34.0848	0.405764
2000	19.6133	62	704.336	5.75734e-05	0.803101	4.34713	34.2067	0.405822
2000	19.6133	62.2	703.026	5.74138e-05	0.804476	4.35055	34.3292	0.405879
2000	19.6133	62.4	701.715	5.72541e-05	0.805852	4.35397	34.4521	0.405934
2000	19.6133	62.6	700.401	5.70951e-05	0.807227	4.35739	34.5756	0.405989
2000	19.6133	62.8	699.084	5.69367e-05	0.808602	4.36081	34.6998	0.406042
2000	19.6133	63	697.767	5.67784e-05	0.809978	4.36424	34.8244	0.406094
2000	19.6133	63.2	696.45	5.66209e-05	0.811353	4.36767	34.9495	0.406145
2000	19.6133	63.4	695.133	5.64633e-05	0.812729	4.3711	35.0751	0.406195
2000	19.6133	63.6	693.812	5.63064e-05	0.814104	4.37454	35.2014	0.406244
2000	19.6133	63.8	692.487	5.61499e-05	0.815479	4.37798	35.3283	0.406291
2000	19.6133	64	691.161	5.59935e-05	0.816855	4.38142	35.4557	0.406338
2000	19.6133	64.2	689.836	5.58383e-05	0.81823	4.38486	35.5837	0.406383
2000	19.6133	64.4	688.511	5.56831e-05	0.819606	4.38831	35.7121	0.406427
2000	19.6133	64.6	687.184	5.55284e-05	0.820981	4.39176	35.8411	0.40647
2000	19.6133	64.8	685.855	5.53743e-05	0.822356	4.39521	35.9707	0.406511
2000	19.6133	65	684.526	5.52201e-05	0.823732	4.39866	36.1008	0.406552
2000	19.6133	65.2	683.193	5.5067e-05	0.825107	4.40212	36.2317	0.406592
2000	19.6133	65.4	681.86	5.49139e-05	0.826483	4.40558	36.363	0.40663
2000	19.6133	65.6	680.526	5.47613e-05	0.827858	4.40904	36.4949	0.406667
2000	19.6133	65.8	679.191	5.46092e-05	0.829233	4.4125	36.6274	0.406703
2000	19.6133	66	677.857	5.44571e-05	0.830609	4.41597	36.7604	0.406738
2000	19.6133	66.2	676.52	5.43066e-05	0.831984	4.41944	36.894	0.406772
2000	19.6133	66.4	675.183	5.41561e-05	0.83336	4.42292	37.0282	0.406805
2000	19.6133	66.6	673.846	5.4006e-05	0.834735	4.42639	37.1629	0.406837
2000	19.6133	66.8	672.509	5.38564e-05	0.83611	4.42987	37.2981	0.406867
2000	19.6133	67	671.173	5.37067e-05	0.837486	4.43335	37.4339	0.406897
2000	19.6133	67.2	669.83	5.35583e-05	0.838861	4.43684	37.5705	0.406925
2000	19.6133	67.4	668.488	5.34099e-05	0.840237	4.44032	37.7077	0.406953
2000	19.6133	67.6	667.146	5.3262e-05	0.841097	4.44381	37.8222	0.40673
2000	19.6133	67.8	665.805	5.31146e-05	0.841775	4.44731	37.9289	0.406419
2000	19.6133	68	664.464	5.29672e-05	0.842453	4.4508	38.0361	0.406107
2000	19.6133	68.2	663.118	5.28211e-05	0.84313	4.4543	38.1439	0.405796
2000	19.6133	68.4	661.773	5.2675e-05	0.843808	4.4578	38.2521	0.405484
2000	19.6133	68.6	660.428	5.25296e-05	0.844486	4.4613	38.3608	0.405173
2000	19.6133	68.8	659.083	5.23847e-05	0.845164	4.46481	38.47	0.404862
2000	19.6133	69	657.738	5.22399e-05	0.845841	4.46832	38.5796	0.40455
2000	19.6133	69.2	656.392	5.20961e-05	0.846519	4.47183	38.6897	0.404239
2000	19.6133	69.4	655.045	5.19523e-05	0.847197	4.47534	38.8002	0.403927
2000	19.6133	69.6	653.697	5.18091e-05	0.847875	4.47886	38.9114	0.403616
2000	19.6133	69.8	652.347	5.16666e-05	0.848552	4.48238	39.023	0.403304
2000	19.6133	70	650.998	5.15241e-05	0.84923	4.4859	39.1352	0.402993
2000	19.6133	70.2	649.653	5.13827e-05	0.849908	4.48943	39.2475	0.402681
2000	19.6133	70.4	648.309	5.12413e-05	0.850586	4.49296	39.3602	0.402369
2000	19.6133	70.6	646.961	5.11007e-05	0.851263	4.49649	39.4736	0.402058
2000	19.6133	70.8	645.612	5.09609e-05	0.851941	4.50002	39.5876	0.401746
2000	19.6133	71	644.262	5.08212e-05	0.852619	4.50356	39.7021	0.401435
2000	19.6133	71.2	642.916	5.06826e-05	0.853297	4.5071	39.8169	0.401123
2000	19.6133	71.4	641.569	5.05439e-05	0.853974	4.51064	39.9321	0.400811
2000	19.6133	71.6	640.221	5.04059e-05	0.854652	4.51418	40.048	0.4005
2000	19.6133	71.8	638.872	5.02685e-05	0.85533	4.51773	40.1644	0.400188
2000	19.6133	72	637.522	5.01311e-05	0.856007	4.52128	40.2813	0.399876
2000	19.6133	72.2	636.176	4.99949e-05	0.856685	4.52484	40.3985	0.399565
2000	19.6133	72.4	634.829	4.98586e-05	0.857363	4.52839	40.5162	0.399253
2000	19.6133	72.6	633.483	4.97232e-05	0.858041	4.53195	40.6344	0.398941
2000	19.6133	72.8	632.138	4.95886e-05	0.858718	4.53551	40.7531	0.39863
2000	19.6133	73	630.792	4.9454e-05	0.859396	4.53908	40.8722	0.398318
2000	19.6133	73.2	629.448	4.93201e-05	0.860074	4.54264	40.9918	0.398006
2000	19.6133	73.4	628.104	4.91862e-05	0.860752	4.54621	41.1119	0.397695
2000	19.6133	73.6	626.761	4.90533e-05	0.861429	4.54979	41.2324	0.397383
2000	19.6133	73.8	625.419	4.89214e-05	0.862107	4.55336	41.3534	0.397071
2000	19.6133	74	624.076	4.87894e-05	0.862785	4.55694	41.475	0.396759
2000	19.6133	74.2	622.735	4.86583e-05	0.863463	4.56052	41.597	0.396448
2000	19.6133	74.4	621.393	4.85272e-05	0.86414	4.56411	41.7195	0.396136
2000	19.6133	74.6	620.053	4.83971e-05	0.864818	4.56769	41.8425	0.395824
2000	19.6133	74.8	618.714	4.8268e-05	0.865496	4.57128	41.9659	0.395513
2000	19.6133	75	617.375	4.81389e-05	0.866174	4.57487	42.0898	0.395201
2000	19.6133	75.2	616.039	4.80106e-05	0.866851	4.57847	42.2141	0.394889
2000	19.6133	75.4	614.703	4.78823e-05	0.867529	4.58207	42.339	0.394577
2000	19.6133	75.6	613.367	4.77547e-05	0.868207	4.58567	42.4643	0.394266
2000	19.6133	75.8	612.032	4.76279e-05	0.868885	4.58927	42.5901	0.393954
2000	19.6133	76	610.697	4.75011e-05	0.869562	4.59288	42.7165	0.393642
2000	19.6133	76.2	609.366	4.73758e-05	0.87024	4.59649	42.8432	0.393331
2000	19.6133	76.4	608.034	4.72504e-05	0.870918	4.6001	42.9705	0.393019
2000	19.6133	76.6	606.705	4.71258e-05	0.871595	4.60372	43.0981	0.392707
2000	19.6133	76.8	605.378	4.70018e-05	0.872273	4.60733	43.2262	0.392396
2000	19.6133	77	604.051	4.68778e-05	0.872951	4.61096	43.3548	0.392084
2000	19.6133	77.2	602.726	4.67554e-05	0.873629	4.61458	43.4838	0.391773
2000	19.6133	77.4	601.402	4.6633e-05	0.874306	4.61821	43.6134	0.391461
2000	19.6133	77.6	600.08	4.65111e-05	0.874984	4.62184	43.7434	0.391149
2000	19.6133	77.8	598.761	4.63899e-05	0.875662	4.62547	43.8737	0.390838
2000	19.6133	78	597.442	4.62686e-05	0.87634	4.6291	44.0046	0.390526
2000	19.6133	78.2	596.125	4.61489e-05	0.876968	4.63274	44.1334	0.390193
2000	19.6133	78.4	594.808	4.60291e-05	0.877558	4.63638	44.2609	0.389842
2000	19.6133	78.6	593.496	4.59101e-05	0.878149	4.64003	44.3886	0.389492
2000	19.6133	78.8	592.187	4.5792e-05	0.87874	4.64367	44.5167	0.389142
2000	19.6133	79	590.878	4.56739e-05	0.87933	4.64732	44.6453	0.388793
2000	19.6133	79.2	589.569	4.5557e-05	0.879921	4.65097	44.7744	0.388443
2000	19.6133	79.4	588.261	4.54402e-05	0.880512	4.65463	44.9042	0.388094
2000	19.6133	79.6	586.956	4.5324e-05	0.881103	4.65829	45.0342	0.387744
2000	19.6133	79.8	585.654	4.52087e-05	0.881693	4.66195	45.1645	0.387395
2000	19.6133	80	584.353	4.50933e-05	0.882284	4.66561	45.2954	0.387046
2000	19.6133	80.2	583.06	4.49792e-05	0.882875	4.66928	45.4263	0.386697
2000	19.6133	80.4	581.766	4.48651e-05	0.883465	4.67295	45.5578	0.386348
2000	19.6133	80.6	580.474	4.47519e-05	0.884056	4.67662	45.6897	0.386
2000	19.6133	80.8	579.183	4.46396e-05	0.884647	4.6803	45.8221	0.385651
2000	19.6133	81	577.893	4.45273e-05	0.885237	4.68397	45.9551	0.385303
2000	19.6133	81.2	576.608	4.44161e-05	0.885828	4.68765	46.0883	0.384955
2000	19.6133	81.4	575.322	4.4305e-05	0.886419	4.69134	46.222	0.384607
2000	19.6133	81.6	574.041	4.41946e-05	0.88701	4.69503	46.3561	0.384259
2000	19.6133	81.8	572.762	4.40849e-05	0.8876	4.69872	46.4905	0.383911
2000	19.6133	82	571.483	4.39752e-05	0.888191	4.70241	46.6255	0.383563
2000	19.6133	82.2	570.213	4.38673e-05	0.888782	4.7061	46.7605	0.383216
2000	19.6133	82.4	568.943	4.37594e-05	0.889372	4.7098	46.896	0.382869
2000	19.6133	82.6	567.675	4.36521e-05	0.889963	4.7135	47.032	0.382521
2000	19.6133	82.8	566.41	4.35453e-05	0.890554	4.71721	47.1684	0.382174
2000	19.6133	83	565.144	4.34385e-05	0.891144	4.72091	47.3054	0.381827
2000	19.6133	83.2	563.885	4.33331e-05	0.891735	4.72462	47.4424	0.381481
2000	19.6133	83.4	562.626	4.32276e-05	0.892326	4.72834	47.5801	0.381134
2000	19.6133	83.6	561.37	4.31231e-05	0.892916	4.73205	47.718	0.380788
2000	19.6133	83.8	560.118	4.30196e-05	0.893507	4.73577	47.8563	0.380441
2000	19.6133	84	558.867	4.2916e-05	0.894098	4.73949	47.9952	0.380095
2000	19.6133	84.2	557.623	4.28137e-05	0.894689	4.74322	48.134	0.379749
2000	19.6133	84.4	556.38	4.27113e-05	0.895279	4.74695	48.2734	0.379403
2000	19.6133	84.6	555.141	4.26097e-05	0.89587	4.75068	48.4131	0.379058
2000	19.6133	84.8	553.905	4.25089e-05	0.896461	4.75441	48.5531	0.378712
2000	19.6133	85	552.669	4.24081e-05	0.897051	4.75815	48.6938	0.378367
2000	19.6133	85.2	551.441	4.23086e-05	0.897642	4.76189	48.8344	0.378021
2000	19.6133	85.4	550.212	4.2209e-05	0.898233	4.76563	48.9756	0.377676
2000	19.6133	85.6	548.988	4.21102e-05	0.898823	4.76937	49.1171	0.377331
2000	19.6133	85.8	547.768	4.20122e-05	0.899414	4.77312	49.2589	0.376987
2000	19.6133	86	546.547	4.19142e-05	0.900005	4.77687	49.4013	0.376642
2000	19.6133	86.2	545.334	4.18178e-05	0.900596	4.78063	49.5437	0.376297
2000	19.6133	86.4	544.122	4.17215e-05	0.901186	4.78439	49.6867	0.375953
2000	19.6133	86.6	542.913	4.16258e-05	0.901777	4.78815	49.8299	0.375609
2000	19.6133	86.8	541.709	4.15309e-05	0.902368	4.79191	49.9734	0.375265
2000	19.6133	87	540.504	4.1436e-05	0.902958	4.79567	50.1176	0.374921
2000	19.6133	87.2	539.311	4.13423e-05	0.903549	4.79944	50.2613	0.374577
2000	19.6133	87.4	538.117	4.12485e-05	0.90414	4.80321	50.4058	0.374234
2000	19.6133	87.6	536.925	4.11555e-05	0.90473	4.80699	50.5506	0.37389
2000	19.6133	87.8	535.736	4.10632e-05	0.905321	4.81077	50.6959	0.373547
2000	19.6133	88	534.547	4.09708e-05	0.905912	4.81455	50.8419	0.373204
2000	19.6133	88.2	533.369	4.08799e-05	0.906503	4.81833	50.9874	0.372861
2000	19.6133	88.4	532.191	4.0789e-05	0.907093	4.82212	51.1335	0.372518
2000	19.6133	88.6	531.017	4.06988e-05	0.907684	4.82591	51.2799	0.372176
2000	19.6133	88.8	529.846	4.06095e-05	0.908275	4.8297	51.4267	0.371833
2000	19.6133	89	528.676	4.05203e-05	0.908865	4.8335	51.5741	0.371491
2000	19.6133	89.2	527.515	4.04322e-05	0.909456	4.83729	51.7212	0.371149
2000	19.6133	89.4	526.354	4.03441e-05	0.910047	4.8411	51.8689	0.370807
2000	19.6133	89.6	525.198	4.02568e-05	0.910637	4.8449	52.0168	0.370465
2000	19.6133	89.8	524.046	4.01702e-05	0.911228	4.84871	52.1649	0.370123
2000	19.6133	90	522.895	4.00835e-05	0.911819	4.85252	52.3137	0.369782
2000	19.6133	90.2	521.752	3.99983e-05	0.912409	4.85633	52.4622	0.36944
2000	19.6133	90.4	520.609	3.9913e-05	0.913	4.86015	52.6114	0.369099
2000	19.6133	90.6	519.472	3.98284e-05	0.913591	4.86397	52.7607	0.368758
2000	19.6133	90.8	518.341	3.97446e-05	0.914182	4.86779	52.9101	0.368417
2000	19.6133	91	517.209	3.96607e-05	0.914772	4.87162	53.0601	0.368077
2000	19.6133	91.2	516.084	3.95781e-05	0.915363	4.87545	53.2101	0.367736
2000	19.6133	91.4	514.958	3.94956e-05	0.915954	4.87928	53.3608	0.367396
2000	19.6133	91.6	513.839	3.94136e-05	0.916544	4.88311	53.5115	0.367055
2000	19.6133	91.8	512.727	3.93322e-05	0.917135	4.88695	53.6622	0.366715
2000	19.6133	92	511.614	3.92508e-05	0.917726	4.89079	53.8136	0.366375
2000	19.6133	92.2	510.507	3.91711e-05	0.918316	4.89463	53.965	0.366036
2000	19.6133	92.4	509.399	3.90914e-05	0.918907	4.89848	54.1171	0.365696
2000	19.6133	92.6	508.298	3.90122e-05	0.919498	4.90233	54.2692	0.365357
2000	19.6133	92.8	507.202	3.89337e-05	0.920089	4.90618	54.4214	0.365017
2000	19.6133	93	506.106	3.88551e-05	0.920679	4.91004	54.5743	0.364678
2000	19.6133	93.2	505.022	3.87777e-05	0.92127	4.9139	54.7265	0.364339
2000	19.6133	93.4	503.938	3.87003e-05	0.921861	4.91776	54.8794	0.364001
2000	19.6133	93.6	502.858	3.86237e-05	0.922451	4.92162	55.0325	0.363662
2000	19.6133	93.8	501.782	3.85478e-05	0.923042	4.92549	55.1859	0.363324
2000	19.6133	94	500.706	3.8472e-05	0.923633	4.92936	55.3398	0.362985
2000	19.6133	94.2	499.637	3.83972e-05	0.924223	4.93324	55.4937	0.362647
2000	19.6133	94.4	498.569	3.83225e-05	0.924814	4.93711	55.6481	0.362309
2000	19.6133	94.6	497.506	3.82483e-05	0.925405	4.94099	55.8027	0.361972
2000	19.6133	94.8	496.448	3.81747e-05	0.925995	4.94488	55.9573	0.361634
2000	19.6133	95	495.39	3.8101e-05	0.926586	4.94876	56.1125	0.361297
2000	19.6133	95.2	494.342	3.80287e-05	0.927177	4.95265	56.2674	0.360959
2000	19.6133	95.4	493.293	3.79563e-05	0.927768	4.95654	56.4229	0.360622
2000	19.6133	95.6	492.251	3.78848e-05	0.928358	4.96044	56.5784	0.360285
2000	19.6133	95.8	491.215	3.78142e-05	0.928949	4.96434	56.7338	0.359949
2000	19.6133	96	490.179	3.77435e-05	0.92954	4.96824	56.8898	0.359612
2000	19.6133	96.2	489.152	3.76737e-05	0.93013	4.97214	57.0455	0.359276
2000	19.6133	96.4	488.125	3.76039e-05	0.930721	4.97605	57.2019	0.35894
2000	19.6133	96.6	487.1	3.75347e-05	0.931312	4.97996	57.3585	0.358603
2000	19.6133	96.8	486.079	3.7466e-05	0.931902	4.98388	57.5154	0.358268
2000	19.6133	97	485.059	3.73973e-05	0.932493	4.98779	57.673	0.357932
2000	19.6133	97.2	484.053	3.73299e-05	0.933084	4.99171	57.8294	0.357596
2000	19.6133	97.4	483.048	3.72625e-05	0.933675	4.99564	57.9865	0.357261
2000	19.6133	97.6	482.046	3.71957e-05	0.934265	4.99956	58.1437	0.356926
2000	19.6133	97.8	481.048	3.71293e-05	0.934856	5.00349	58.3011	0.356591
2000	19.6133	98	480.051	3.7063e-05	0.935447	5.00742	58.4592	0.356256
2000	19.6133	98.2	479.061	3.6998e-05	0.936037	5.01136	58.617	0.355921
2000	19.6133	98.4	478.071	3.6933e-05	0.936628	5.0153	58.7754	0.355587
2000	19.6133	98.6	477.085	3.68686e-05	0.937219	5.01924	58.9341	0.355252
2000	19.6133	98.8	476.102	3.68047e-05	0.937809	5.02318	59.093	0.354918
2000	19.6133	99	475.119	3.67408e-05	0.9384	5.02713	59.2525	0.354584
2000	19.6133	99.2	474.152	3.66778e-05	0.938991	5.03108	59.4107	0.35425
2000	19.6133	99.4	473.186	3.66148e-05	0.939582	5.03503	59.5695	0.353917
2000	19.6133	99.6	472.222	3.65524e-05	0.940172	5.03899	59.7286	0.353583
2000	19.6133	99.8	471.261	3.64908e-05	0.940763	5.04295	59.888	0.35325
2000	19.6133	100	470.3	3.64292e-05	0.941354	5.04691	60.0481	0.352917
2000	19.6133	100.2	469.348	3.63686e-05	0.941944	5.05088	60.2076	0.352584
2000	19.6133	100.4	468.397	3.6308e-05	0.942535	5.05485	60.3677	0.352251
2000	19.6133	100.6	467.452	3.62478e-05	0.943126	5.05882	60.5276	0.351918
2000	19.6133	100.8	466.514	3.6188e-05	0.943716	5.0628	60.6873	0.351586
2000	19.6133	101	465.576	3.61283e-05	0.944307	5.06678	60.8476	0.351254

## Sheet: Figure 2ghi
Depth	Pressure	Temp-erature	CO2 density	CO2 viscosity	Injection rate	Plume radius	Plume volume	Storage potential of plume
m	Mpa	°C	kg/m3	Pa*s	MtCO2/yr	km	Mm3	MtCO2/km2	19.6	4.9
1000	9.80665	36	690.084	5.47877e-05	0.268015	3.25485	11.6514	0.241584
1005	9.85568	36.125	690.389	5.48323e-05	0.270391	3.26125	11.7495	0.242771
1010	9.90472	36.25	690.7	5.48767e-05	0.272769	3.26764	11.8475	0.243948
1015	9.95375	36.375	691.011	5.492e-05	0.275148	3.27403	11.9455	0.245116
1020	10.0028	36.5	691.316	5.49618e-05	0.277529	3.28042	12.0435	0.246275
1025	10.0518	36.625	691.599	5.50036e-05	0.279912	3.28681	12.1419	0.247426
1030	10.1008	36.75	691.894	5.50455e-05	0.282297	3.29319	12.2402	0.248567
1035	10.1499	36.875	692.194	5.5087e-05	0.284683	3.29957	12.3383	0.249699
1040	10.1989	37	692.493	5.51276e-05	0.287071	3.30595	12.4364	0.250823
1045	10.2479	37.125	692.721	5.51633e-05	0.28946	3.31232	12.5358	0.251939
1050	10.297	37.25	692.994	5.52025e-05	0.291852	3.3187	12.6344	0.253046
1055	10.346	37.375	693.277	5.5242e-05	0.294245	3.32506	12.7328	0.254144
1060	10.395	37.5	693.564	5.52812e-05	0.29664	3.33143	12.8311	0.255235
1065	10.4441	37.625	693.791	5.53161e-05	0.299036	3.33779	12.9305	0.256317
1070	10.4931	37.75	694.017	5.53502e-05	0.301435	3.34415	13.03	0.257391
1075	10.5421	37.875	694.277	5.53865e-05	0.303835	3.35051	13.1288	0.258456
1080	10.5912	38	694.548	5.54232e-05	0.306236	3.35686	13.2274	0.259514
1085	10.6402	38.125	694.767	5.54572e-05	0.30864	3.36321	13.3271	0.260565
1090	10.6892	38.25	694.989	5.54908e-05	0.311045	3.36955	13.4266	0.261607
1095	10.7383	38.375	695.212	5.55236e-05	0.313452	3.3759	13.5262	0.262642
1100	10.7873	38.5	695.458	5.55577e-05	0.31586	3.38224	13.6253	0.263669
1105	10.8363	38.625	695.667	5.55902e-05	0.318271	3.38857	13.7251	0.264688
1110	10.8854	38.75	695.882	5.56225e-05	0.320683	3.3949	13.8249	0.265701
1115	10.9344	38.875	696.099	5.56544e-05	0.323097	3.40123	13.9246	0.266706
1120	10.9834	39	696.315	5.56855e-05	0.325512	3.40755	14.0243	0.267703
1125	11.0325	39.125	696.503	5.57155e-05	0.327929	3.41387	14.1247	0.268693
1130	11.0815	39.25	696.707	5.57462e-05	0.330348	3.42019	14.2247	0.269677
1135	11.1305	39.375	696.916	5.57768e-05	0.332769	3.4265	14.3246	0.270653
1140	11.1796	39.5	697.128	5.58071e-05	0.335191	3.43281	14.4245	0.271622
1145	11.2286	39.625	697.299	5.5835e-05	0.337615	3.43911	14.5253	0.272585
1150	11.2776	39.75	697.483	5.58635e-05	0.340041	3.44541	14.6258	0.27354
1155	11.3267	39.875	697.68	5.58927e-05	0.342469	3.4517	14.726	0.274489
1160	11.3757	40	697.882	5.59217e-05	0.344898	3.45799	14.8262	0.275432
1165	11.4247	40.125	698.047	5.59488e-05	0.347329	3.46428	14.9272	0.276368
1170	11.4738	40.25	698.215	5.59755e-05	0.349761	3.47056	15.0281	0.277297
1175	11.5228	40.375	698.392	5.60024e-05	0.352196	3.47683	15.1289	0.27822
1180	11.5718	40.5	698.584	5.603e-05	0.354632	3.48311	15.2293	0.279136
1185	11.6209	40.625	698.747	5.60563e-05	0.35707	3.48937	15.3304	0.280046
1190	11.6699	40.75	698.912	5.60823e-05	0.359509	3.49563	15.4315	0.28095
1195	11.7189	40.875	699.077	5.61079e-05	0.361951	3.50189	15.5327	0.281848
1200	11.768	41	699.246	5.61335e-05	0.364394	3.50814	15.6337	0.28274
1205	11.817	41.125	699.4	5.61587e-05	0.366838	3.51439	15.7351	0.283626
1210	11.866	41.25	699.559	5.61838e-05	0.369285	3.52063	15.8365	0.284506
1215	11.9151	41.375	699.72	5.62086e-05	0.371733	3.52687	15.9378	0.28538
1220	11.9641	41.5	699.882	5.6233e-05	0.374183	3.53295	16.0391	0.286273
1225	12.0131	41.625	700.018	5.62563e-05	0.376635	3.539	16.1411	0.287165
1230	12.0622	41.75	700.17	5.62804e-05	0.379088	3.54504	16.2427	0.288051
1235	12.1112	41.875	700.325	5.63043e-05	0.381543	3.55107	16.3443	0.288932
1240	12.1602	42	700.482	5.63279e-05	0.384	3.5571	16.4458	0.289808
1245	12.2093	42.125	700.613	5.63504e-05	0.386458	3.56312	16.548	0.290679
1250	12.2583	42.25	700.747	5.63727e-05	0.388918	3.56914	16.6502	0.291544
1255	12.3073	42.375	700.895	5.63956e-05	0.39138	3.57514	16.752	0.292404
1260	12.3564	42.5	701.044	5.64183e-05	0.393844	3.58115	16.8539	0.293259
1265	12.4054	42.625	701.17	5.64401e-05	0.396309	3.58714	16.9563	0.294109
1270	12.4544	42.75	701.3	5.64615e-05	0.398777	3.59313	17.0587	0.294954
1275	12.5035	42.875	701.434	5.64827e-05	0.401245	3.59912	17.1611	0.295794
1280	12.5525	43	701.58	5.65045e-05	0.403716	3.60509	17.2632	0.29663
1285	12.6015	43.125	701.701	5.65258e-05	0.406188	3.61106	17.3659	0.29746
1290	12.6506	43.25	701.826	5.65469e-05	0.408662	3.61703	17.4685	0.298286
1295	12.6996	43.375	701.952	5.65676e-05	0.411138	3.62298	17.5712	0.299107
1300	12.7486	43.5	702.08	5.65878e-05	0.413615	3.62893	17.6739	0.299924
1305	12.7977	43.625	702.196	5.66085e-05	0.416094	3.63487	17.7768	0.300736
1310	12.8467	43.75	702.316	5.66289e-05	0.418575	3.64081	17.8798	0.301543
1315	12.8957	43.875	702.439	5.66492e-05	0.421058	3.64674	17.9827	0.302346
1320	12.9448	44	702.564	5.66691e-05	0.423542	3.65266	18.0856	0.303145
1325	12.9938	44.125	702.67	5.66883e-05	0.426028	3.65857	18.189	0.303939
1330	13.0428	44.25	702.784	5.67078e-05	0.428516	3.66448	18.2922	0.304729
1335	13.0919	44.375	702.901	5.67272e-05	0.431005	3.67038	18.3954	0.305515
1340	13.1409	44.5	703.021	5.67463e-05	0.433497	3.67627	18.4986	0.306297
1345	13.1899	44.625	703.126	5.67651e-05	0.435989	3.68215	18.6022	0.307074
1350	13.239	44.75	703.232	5.67837e-05	0.438484	3.68803	18.7058	0.307848
1355	13.288	44.875	703.344	5.68025e-05	0.44098	3.6939	18.8093	0.308617
1360	13.337	45	703.46	5.68212e-05	0.443478	3.69976	18.9127	0.309383
1365	13.3861	45.125	703.559	5.68394e-05	0.445978	3.70562	19.0167	0.310145
1370	13.4351	45.25	703.66	5.68572e-05	0.44848	3.71146	19.1206	0.310903
1375	13.4841	45.375	703.761	5.68747e-05	0.450983	3.7173	19.2246	0.311657
1380	13.5332	45.5	703.869	5.68922e-05	0.453488	3.72313	19.3284	0.312407
1385	13.5822	45.625	703.967	5.691e-05	0.455995	3.72895	19.4325	0.313154
1390	13.6312	45.75	704.067	5.69278e-05	0.458503	3.73477	19.5366	0.313897
1395	13.6803	45.875	704.169	5.69454e-05	0.461013	3.74057	19.6407	0.314636
1400	13.7293	46	704.271	5.69627e-05	0.463525	3.74637	19.7449	0.315372
1405	13.7783	46.125	704.359	5.69797e-05	0.466039	3.75216	19.8495	0.316105
1410	13.8274	46.25	704.453	5.69967e-05	0.468554	3.75794	19.9539	0.316834
1415	13.8764	46.375	704.549	5.70134e-05	0.471071	3.76371	20.0584	0.317559
1420	13.9254	46.5	704.647	5.703e-05	0.47359	3.76948	20.1628	0.318281
1425	13.9745	46.625	704.733	5.70464e-05	0.476132	3.77523	20.2686	0.319015
1430	14.0235	46.75	704.823	5.70627e-05	0.478731	3.78098	20.3767	0.319782
1435	14.0725	46.875	704.917	5.70789e-05	0.481332	3.78672	20.4846	0.320546
1440	14.1216	47	705.012	5.7095e-05	0.483935	3.79245	20.5926	0.321306
1445	14.1706	47.125	705.094	5.7111e-05	0.486539	3.79817	20.701	0.322063
1450	14.2196	47.25	705.177	5.71267e-05	0.489145	3.80388	20.8095	0.322816
1455	14.2687	47.375	705.262	5.71422e-05	0.491753	3.80958	20.9179	0.323567
1460	14.3177	47.5	705.353	5.71578e-05	0.494363	3.81528	21.0262	0.324313
1465	14.3667	47.625	705.433	5.71736e-05	0.496974	3.82096	21.1349	0.325057
1470	14.4158	47.75	705.516	5.71892e-05	0.499587	3.82664	21.2435	0.325798
1475	14.4648	47.875	705.599	5.72045e-05	0.502214	3.83231	21.3527	0.326543
1480	14.5138	48	705.684	5.72196e-05	0.504844	3.83796	21.4619	0.327286
1485	14.5629	48.125	705.761	5.72347e-05	0.50748	3.84361	21.5716	0.328028
1490	14.6119	48.25	705.84	5.72497e-05	0.51012	3.84925	21.6814	0.32877
1495	14.6609	48.375	705.92	5.72645e-05	0.512961	3.85488	21.7997	0.329636
1500	14.71	48.5	706.002	5.7279e-05	0.515831	3.8605	21.9191	0.330516
1505	14.759	48.625	706.071	5.72936e-05	0.5187	3.86611	22.0388	0.33139
1510	14.808	48.75	706.146	5.73081e-05	0.521566	3.87171	22.1583	0.332258
1515	14.8571	48.875	706.223	5.73224e-05	0.524431	3.8773	22.2776	0.333121
1520	14.9061	49	706.303	5.73365e-05	0.527295	3.88288	22.3967	0.333977
1525	14.9551	49.125	706.373	5.73508e-05	0.530156	3.88845	22.516	0.334828
1530	15.0042	49.25	706.444	5.73649e-05	0.533016	3.89401	22.6352	0.335674
1535	15.0532	49.375	706.518	5.73789e-05	0.535874	3.89956	22.7542	0.336513
1540	15.1022	49.5	706.594	5.73926e-05	0.538731	3.9051	22.873	0.337348
1545	15.1513	49.625	706.662	5.74066e-05	0.541585	3.91064	22.992	0.338177
1550	15.2003	49.75	706.731	5.74202e-05	0.544438	3.91616	23.1108	0.339
1555	15.2493	49.875	706.802	5.74335e-05	0.547289	3.92167	23.2295	0.339818
1560	15.2984	50	706.876	5.74469e-05	0.550138	3.92715	23.348	0.340635
1565	15.3474	50.125	706.939	5.74607e-05	0.552986	3.93191	23.4668	0.341568
1570	15.3964	50.25	707.003	5.74742e-05	0.555831	3.93668	23.5854	0.342495
1575	15.4455	50.375	707.069	5.74876e-05	0.558675	3.94144	23.7039	0.343417
1580	15.4945	50.5	707.135	5.75008e-05	0.561517	3.94619	23.8222	0.344332
1585	15.5435	50.625	707.198	5.7514e-05	0.564357	3.95094	23.9405	0.345242
1590	15.5926	50.75	707.263	5.7527e-05	0.567195	3.95569	24.0587	0.346145
1595	15.6416	50.875	707.329	5.75399e-05	0.570031	3.96044	24.1767	0.347043
1600	15.6906	51	707.397	5.75527e-05	0.572865	3.96518	24.2946	0.347935
1605	15.7397	51.125	707.455	5.75655e-05	0.575697	3.96991	24.4127	0.348821
1610	15.7887	51.25	707.515	5.75782e-05	0.578527	3.97465	24.5307	0.349702
1615	15.8377	51.375	707.576	5.75906e-05	0.581356	3.97938	24.6485	0.350577
1620	15.8868	51.5	707.638	5.76028e-05	0.584182	3.9841	24.7661	0.351446
1625	15.9358	51.625	707.695	5.76152e-05	0.587006	3.98883	24.8839	0.352309
1630	15.9848	51.75	707.754	5.76274e-05	0.589828	3.99354	25.0014	0.353167
1635	16.0339	51.875	707.814	5.76396e-05	0.592649	3.99826	25.1188	0.354019
1640	16.0829	52	707.876	5.76518e-05	0.595467	4.00297	25.2361	0.354866
1645	16.1319	52.125	707.932	5.76644e-05	0.598283	4.00767	25.3534	0.355707
1650	16.181	52.25	707.988	5.76766e-05	0.601097	4.01238	25.4706	0.356543
1655	16.23	52.375	708.045	5.76885e-05	0.603909	4.01708	25.5877	0.357374
1660	16.279	52.5	708.104	5.77001e-05	0.606718	4.02177	25.7046	0.358199
1665	16.3281	52.625	708.156	5.77123e-05	0.609526	4.02646	25.8217	0.359018
1670	16.3771	52.75	708.209	5.77242e-05	0.612332	4.03115	25.9386	0.359833
1675	16.4261	52.875	708.263	5.77358e-05	0.615135	4.03583	26.0554	0.360642
1680	16.4752	53	708.317	5.77471e-05	0.617936	4.04051	26.172	0.361446
1685	16.5242	53.125	708.368	5.77588e-05	0.620735	4.04518	26.2887	0.362244
1690	16.5732	53.25	708.421	5.77705e-05	0.623532	4.04985	26.4051	0.363038
1695	16.6223	53.375	708.475	5.7782e-05	0.626326	4.05452	26.5214	0.363826
1700	16.6713	53.5	708.531	5.77932e-05	0.629119	4.05918	26.6376	0.364609
1705	16.7203	53.625	708.581	5.78045e-05	0.631909	4.06383	26.7538	0.365387
1710	16.7694	53.75	708.631	5.78157e-05	0.634696	4.06849	26.87	0.36616
1715	16.8184	53.875	708.682	5.78268e-05	0.637482	4.07314	26.986	0.366928
1720	16.8674	54	708.733	5.78377e-05	0.640265	4.07778	27.1018	0.367691
1725	16.9165	54.125	708.779	5.78491e-05	0.643046	4.08242	27.2178	0.36845
1730	16.9655	54.25	708.826	5.78603e-05	0.645825	4.08706	27.3336	0.369203
1735	17.0145	54.375	708.873	5.78712e-05	0.648601	4.09169	27.4492	0.369951
1740	17.0636	54.5	708.923	5.7882e-05	0.651375	4.09631	27.5647	0.370694
1745	17.1126	54.625	708.969	5.78928e-05	0.654146	4.10093	27.6802	0.371433
1750	17.1616	54.75	709.017	5.79035e-05	0.656915	4.10555	27.7955	0.372167
1755	17.2107	54.875	709.065	5.79139e-05	0.659682	4.11017	27.9106	0.372896
1760	17.2597	55	709.114	5.79242e-05	0.662446	4.11477	28.0257	0.37362
1765	17.3087	55.125	709.155	5.79351e-05	0.665208	4.11938	28.1409	0.37434
1770	17.3578	55.25	709.198	5.79457e-05	0.667968	4.12398	28.2559	0.375055
1775	17.4068	55.375	709.241	5.7956e-05	0.670725	4.12857	28.3708	0.375765
1780	17.4558	55.5	709.285	5.79661e-05	0.673479	4.13316	28.4856	0.37647
1785	17.5049	55.625	709.326	5.79767e-05	0.676231	4.13775	28.6003	0.377172
1790	17.5539	55.75	709.369	5.79872e-05	0.678981	4.14233	28.7149	0.377868
1795	17.6029	55.875	709.413	5.79974e-05	0.681728	4.1469	28.8292	0.37856
1800	17.652	56	709.458	5.80073e-05	0.684472	4.15147	28.9435	0.379247
1805	17.701	56.125	709.5	5.80177e-05	0.687214	4.15604	29.0577	0.37993
1810	17.75	56.25	709.541	5.80281e-05	0.689954	4.1606	29.1718	0.380609
1815	17.7991	56.375	709.583	5.80384e-05	0.69269	4.16516	29.2858	0.381283
1820	17.8481	56.5	709.626	5.80484e-05	0.695425	4.16971	29.3996	0.381953
1825	17.8971	56.625	709.667	5.80584e-05	0.698156	4.17426	29.5134	0.382618
1830	17.9462	56.75	709.708	5.80682e-05	0.700885	4.1788	29.627	0.383279
1835	17.9952	56.875	709.749	5.80779e-05	0.703611	4.18333	29.7406	0.383936
1840	18.0442	57	709.789	5.80874e-05	0.706335	4.18787	29.854	0.384589
1845	18.0933	57.125	709.826	5.80974e-05	0.709056	4.19239	29.9675	0.385237
1850	18.1423	57.25	709.863	5.81073e-05	0.711774	4.19692	30.0808	0.385881
1855	18.1913	57.375	709.901	5.8117e-05	0.71449	4.20143	30.1939	0.386521
1860	18.2404	57.5	709.94	5.81265e-05	0.717203	4.20594	30.3069	0.387156
1865	18.2894	57.625	709.976	5.81364e-05	0.719913	4.21045	30.4199	0.387788
1870	18.3384	57.75	710.012	5.8146e-05	0.72262	4.21495	30.5327	0.388415
1875	18.3875	57.875	710.048	5.81554e-05	0.725325	4.21945	30.6454	0.389039
1880	18.4365	58	710.085	5.81647e-05	0.728027	4.22394	30.758	0.389658
1885	18.4855	58.125	710.119	5.81743e-05	0.730726	4.22842	30.8706	0.390273
1890	18.5346	58.25	710.156	5.81838e-05	0.73345	4.2329	30.984	0.390899
1895	18.5836	58.375	710.193	5.81929e-05	0.736242	4.23738	31.1004	0.391559
1900	18.6326	58.5	710.23	5.82019e-05	0.739034	4.24185	31.2167	0.392216
1905	18.6817	58.625	710.263	5.82112e-05	0.741825	4.24631	31.3331	0.39287
1910	18.7307	58.75	710.296	5.82205e-05	0.744616	4.25077	31.4495	0.393521
1915	18.7797	58.875	710.331	5.82297e-05	0.747406	4.25523	31.5658	0.394169
1920	18.8288	59	710.368	5.82387e-05	0.750202	4.25968	31.6823	0.394818
1925	18.8778	59.125	710.402	5.82481e-05	0.753079	4.26412	31.8022	0.395506
1930	18.9268	59.25	710.436	5.82572e-05	0.755955	4.26856	31.9222	0.396192
1935	18.9759	59.375	710.47	5.82661e-05	0.758831	4.27299	32.0421	0.396875
1940	19.0249	59.5	710.504	5.82749e-05	0.761708	4.27741	32.162	0.397555
1945	19.0739	59.625	710.534	5.82841e-05	0.764584	4.28184	32.2821	0.398233
1950	19.123	59.75	710.565	5.82932e-05	0.76746	4.28625	32.4021	0.398908
1955	19.172	59.875	710.597	5.8302e-05	0.770337	4.29066	32.5221	0.39958
1960	19.221	60	710.63	5.83107e-05	0.773213	4.29506	32.642	0.40025
1965	19.2701	60.125	710.66	5.83197e-05	0.776089	4.29946	32.762	0.400917
1970	19.3191	60.25	710.689	5.83285e-05	0.778966	4.30386	32.8821	0.401582
1975	19.3681	60.375	710.718	5.8337e-05	0.781842	4.30824	33.0022	0.402245
1980	19.4172	60.5	710.748	5.83452e-05	0.784718	4.31262	33.1222	0.402904
1985	19.4662	60.625	710.778	5.83539e-05	0.787595	4.317	33.2422	0.403562
1990	19.5152	60.75	710.809	5.83624e-05	0.790471	4.32137	33.3622	0.404217
1995	19.5643	60.875	710.84	5.83709e-05	0.793347	4.32573	33.4821	0.40487
2000	19.6133	61	710.872	5.83792e-05	0.796224	4.33009	33.602	0.40552
2005	19.6623	61.125	710.899	5.8388e-05	0.7991	4.33444	33.7221	0.406168
2010	19.7114	61.25	710.927	5.83966e-05	0.801976	4.33879	33.8422	0.406814
2015	19.7604	61.375	710.955	5.84049e-05	0.804853	4.34313	33.9622	0.407457
2020	19.8094	61.5	710.985	5.84131e-05	0.807729	4.34746	34.0821	0.408099
2025	19.8585	61.625	711.013	5.8422e-05	0.810605	4.35179	34.2021	0.408737
2030	19.9075	61.75	711.04	5.84306e-05	0.813482	4.35612	34.3222	0.409374
2035	19.9565	61.875	711.067	5.8439e-05	0.816358	4.36043	34.4422	0.410009
2040	20.0056	62	711.094	5.84472e-05	0.819234	4.36474	34.5623	0.410641
2045	20.0546	62.125	711.122	5.84556e-05	0.822111	4.36905	34.6823	0.411271
2050	20.1036	62.25	711.149	5.84638e-05	0.824987	4.37334	34.8023	0.411899
2055	20.1527	62.375	711.176	5.84718e-05	0.827863	4.37764	34.9223	0.412525
2060	20.2017	62.5	711.201	5.84796e-05	0.83074	4.38192	35.0424	0.413149
2065	20.2507	62.625	711.225	5.84878e-05	0.833616	4.3862	35.1626	0.413771
2070	20.2998	62.75	711.251	5.84961e-05	0.836492	4.39048	35.2826	0.414391
2075	20.3488	62.875	711.279	5.85042e-05	0.839369	4.39474	35.4025	0.415009
2080	20.3978	63	711.307	5.85122e-05	0.842245	4.399	35.5224	0.415624
2085	20.4469	63.125	711.332	5.85206e-05	0.845121	4.40326	35.6425	0.416238
2090	20.4959	63.25	711.358	5.85287e-05	0.847998	4.40751	35.7625	0.41685
2095	20.5449	63.375	711.383	5.85365e-05	0.850874	4.41175	35.8825	0.41746
2100	20.594	63.5	711.407	5.8544e-05	0.85375	4.41598	36.0026	0.418068
2105	20.643	63.625	711.429	5.85521e-05	0.856627	4.42021	36.1228	0.418674
2110	20.692	63.75	711.451	5.856e-05	0.859503	4.42444	36.2429	0.419279
2115	20.7411	63.875	711.474	5.85677e-05	0.862379	4.42865	36.3631	0.419881
2120	20.7901	64	711.497	5.85753e-05	0.865256	4.43286	36.4832	0.420482
2125	20.8391	64.125	711.522	5.85836e-05	0.868132	4.43707	36.6032	0.421081
2130	20.8882	64.25	711.545	5.85917e-05	0.871008	4.44126	36.7232	0.421678
2135	20.9372	64.375	711.569	5.85996e-05	0.873885	4.44545	36.8433	0.422273
2140	20.9862	64.5	711.591	5.86074e-05	0.876761	4.44964	36.9634	0.422867
2145	21.0353	64.625	711.614	5.86152e-05	0.879637	4.45381	37.0834	0.423458
2150	21.0843	64.75	711.639	5.86228e-05	0.882514	4.45798	37.2034	0.424049
2155	21.1333	64.875	711.663	5.86304e-05	0.88539	4.46215	37.3234	0.424637
2160	21.1824	65	711.687	5.86379e-05	0.888266	4.46631	37.4434	0.425224
2165	21.2314	65.125	711.708	5.86458e-05	0.891143	4.47046	37.5636	0.425809
2170	21.2804	65.25	711.729	5.86533e-05	0.894019	4.4746	37.6837	0.426393
2175	21.3295	65.375	711.75	5.86607e-05	0.896895	4.47874	37.8038	0.426975
2180	21.3785	65.5	711.772	5.8668e-05	0.899771	4.48287	37.9239	0.427555
2185	21.4275	65.625	711.794	5.86761e-05	0.902648	4.48699	38.0439	0.428134
2190	21.4766	65.75	711.816	5.8684e-05	0.905524	4.49111	38.164	0.428711
2195	21.5256	65.875	711.837	5.86915e-05	0.9084	4.49522	38.2841	0.429287
2200	21.5746	66	711.858	5.86988e-05	0.911277	4.49932	38.4042	0.429861
2205	21.6237	66.125	711.877	5.87064e-05	0.914153	4.50342	38.5244	0.430434
2210	21.6727	66.25	711.896	5.87139e-05	0.917029	4.5075	38.6445	0.431005
2215	21.7217	66.375	711.917	5.87212e-05	0.919906	4.51159	38.7646	0.431575
2220	21.7708	66.5	711.938	5.87285e-05	0.922782	4.51566	38.8846	0.432143
2225	21.8198	66.625	711.957	5.8736e-05	0.925658	4.51973	39.0048	0.43271
2230	21.8688	66.75	711.977	5.87433e-05	0.928535	4.52379	39.1249	0.433276
2235	21.9179	66.875	711.997	5.87505e-05	0.931411	4.52784	39.245	0.43384
2240	21.9669	67	712.019	5.87576e-05	0.934287	4.53189	39.365	0.434403
2245	22.0159	67.125	712.039	5.87652e-05	0.937164	4.53593	39.4851	0.434965
2250	22.065	67.25	712.058	5.87725e-05	0.94004	4.53996	39.6052	0.435525
2255	22.114	67.375	712.077	5.87796e-05	0.942916	4.54399	39.7253	0.436084
2260	22.163	67.5	712.094	5.87864e-05	0.945793	4.54801	39.8455	0.436642
2265	22.2121	67.625	712.11	5.87939e-05	0.948669	4.55202	39.9658	0.437198
2270	22.2611	67.75	712.126	5.88011e-05	0.951545	4.55602	40.0861	0.437754
2275	22.3101	67.875	712.145	5.88082e-05	0.954422	4.56002	40.2062	0.438307
2280	22.3592	68	712.164	5.88152e-05	0.957298	4.56401	40.3263	0.43886
2285	22.4082	68.125	712.183	5.88226e-05	0.960174	4.56799	40.4464	0.439412
2290	22.4572	68.25	712.202	5.883e-05	0.963051	4.57196	40.5665	0.439962
2295	22.5063	68.375	712.22	5.88373e-05	0.965927	4.57593	40.6866	0.440511
2300	22.5553	68.5	712.237	5.88444e-05	0.968803	4.57989	40.8068	0.44106
2305	22.6043	68.625	712.255	5.88517e-05	0.97168	4.58384	40.9269	0.441607
2310	22.6534	68.75	712.273	5.88587e-05	0.974556	4.58779	41.047	0.442152
2315	22.7024	68.875	712.291	5.88654e-05	0.977432	4.59172	41.1671	0.442697
2320	22.7514	69	712.311	5.88717e-05	0.980309	4.59565	41.2871	0.443241
2325	22.8005	69.125	712.327	5.88791e-05	0.983185	4.59957	41.4073	0.443784
2330	22.8495	69.25	712.342	5.88863e-05	0.986061	4.60349	41.5276	0.444325
2335	22.8985	69.375	712.358	5.88934e-05	0.988938	4.6074	41.6478	0.444866
2340	22.9476	69.5	712.374	5.89004e-05	0.991814	4.6113	41.768	0.445406
2345	22.9966	69.625	712.391	5.89076e-05	0.99469	4.61519	41.8881	0.445944
2350	23.0456	69.75	712.408	5.89147e-05	0.997567	4.61907	42.0082	0.446482
2355	23.0947	69.875	712.426	5.89216e-05	1.00508	4.62255	42.3234	0.449166
2360	23.1437	70	712.444	5.89283e-05	1.00833	4.62616	42.4593	0.449917
2365	23.1927	70.125	712.459	5.89353e-05	1.01159	4.62977	42.5958	0.450671
2370	23.2418	70.25	712.473	5.89422e-05	1.01486	4.63336	42.7327	0.451426
2375	23.2908	70.375	712.487	5.89489e-05	1.01814	4.63694	42.8698	0.452184
2380	23.3398	70.5	712.501	5.89554e-05	1.02142	4.64051	43.0071	0.452944
2385	23.3889	70.625	712.518	5.89626e-05	1.02471	4.64407	43.1446	0.453707
2390	23.4379	70.75	712.535	5.89695e-05	1.02801	4.64754	43.2825	0.454488
2395	23.4869	70.875	712.551	5.89763e-05	1.03131	4.65048	43.4206	0.455371
2400	23.536	71	712.567	5.8983e-05	1.03462	4.65343	43.559	0.456254
2405	23.585	71.125	712.581	5.899e-05	1.03794	4.65639	43.6979	0.457137
2410	23.634	71.25	712.594	5.89968e-05	1.04127	4.65935	43.8371	0.458019
2415	23.6831	71.375	712.607	5.90033e-05	1.0446	4.66231	43.9765	0.4589
2420	23.7321	71.5	712.621	5.90096e-05	1.04794	4.66528	44.1163	0.459782
2425	23.7811	71.625	712.636	5.90165e-05	1.05129	4.66825	44.2562	0.460663
2430	23.8302	71.75	712.652	5.90233e-05	1.05464	4.67123	44.3964	0.461544
2435	23.8792	71.875	712.667	5.90301e-05	1.058	4.67421	44.5369	0.462424
2440	23.9282	72	712.682	5.90367e-05	1.06137	4.67719	44.6777	0.463305
2445	23.9773	72.125	712.697	5.90439e-05	1.06474	4.68018	44.8189	0.464184
2450	24.0263	72.25	712.712	5.90507e-05	1.06812	4.68317	44.9602	0.465064
2455	24.0753	72.375	712.728	5.90572e-05	1.07151	4.68617	45.1019	0.465943
2460	24.1244	72.5	712.742	5.90636e-05	1.07491	4.68917	45.2439	0.466822
2465	24.1734	72.625	712.754	5.90704e-05	1.07831	4.69217	45.3864	0.467701
2470	24.2224	72.75	712.765	5.9077e-05	1.08172	4.69518	45.5292	0.468579
2475	24.2715	72.875	712.777	5.90836e-05	1.08514	4.69819	45.6722	0.469457
2480	24.3205	73	712.79	5.909e-05	1.08856	4.7012	45.8155	0.470334
2485	24.3695	73.125	712.803	5.90967e-05	1.09199	4.70422	45.959	0.471212
2490	24.4186	73.25	712.817	5.91033e-05	1.09543	4.70724	46.1028	0.472089
2495	24.4676	73.375	712.83	5.91098e-05	1.09887	4.71026	46.2469	0.472965
2500	24.5166	73.5	712.844	5.91162e-05	1.10101	4.71337	46.3358	0.473259
2505	24.5657	73.625	712.858	5.91229e-05	1.10239	4.71652	46.3929	0.473219
2510	24.6147	73.75	712.871	5.91294e-05	1.10379	4.71966	46.4514	0.473192
2515	24.6637	73.875	712.883	5.91359e-05	1.10524	4.72281	46.5112	0.473178
2520	24.7128	74	712.895	5.91422e-05	1.10671	4.72596	46.5724	0.473178
2525	24.7618	74.125	712.907	5.9149e-05	1.10821	4.7291	46.6347	0.47319
2530	24.8108	74.25	712.921	5.91555e-05	1.10974	4.73224	46.6983	0.473216
2535	24.8599	74.375	712.935	5.91619e-05	1.1113	4.73538	46.7632	0.473254
2540	24.9089	74.5	712.948	5.91681e-05	1.1129	4.73852	46.8295	0.473306
2545	24.9579	74.625	712.96	5.91749e-05	1.11453	4.74166	46.8971	0.47337
2550	25.007	74.75	712.972	5.91814e-05	1.11732	4.74474	47.0139	0.473941
2555	25.056	74.875	712.983	5.91878e-05	1.12101	4.74777	47.1685	0.474899
2560	25.105	75	712.995	5.9194e-05	1.12475	4.75081	47.3251	0.475874
2565	25.1541	75.125	713.008	5.92006e-05	1.12854	4.75385	47.4836	0.476866
2570	25.2031	75.25	713.021	5.92071e-05	1.13238	4.75689	47.6441	0.477876
2575	25.2521	75.375	713.035	5.92136e-05	1.13626	4.75994	47.8066	0.478902
2580	25.3012	75.5	713.047	5.92198e-05	1.14019	4.76298	47.9712	0.479945
2585	25.3502	75.625	713.057	5.92264e-05	1.14417	4.76602	48.1379	0.481005
2590	25.3992	75.75	713.068	5.92328e-05	1.1482	4.76907	48.3067	0.482082
2595	25.4483	75.875	713.081	5.92392e-05	1.15227	4.77212	48.4773	0.483176
2600	25.4973	76	713.095	5.92454e-05	1.1564	4.77517	48.6499	0.484286
2605	25.5463	76.125	713.106	5.92518e-05	1.16028	4.77823	48.8124	0.485288
2610	25.5954	76.25	713.116	5.9258e-05	1.16364	4.78132	48.9531	0.486066
2615	25.6444	76.375	713.127	5.92643e-05	1.16701	4.78441	49.0942	0.486845
2620	25.6934	76.5	713.137	5.92705e-05	1.17039	4.7875	49.2356	0.487624
2625	25.7425	76.625	713.149	5.92772e-05	1.17378	4.79059	49.3772	0.488402
2630	25.7915	76.75	713.161	5.92835e-05	1.17717	4.79369	49.519	0.489181
2635	25.8405	76.875	713.172	5.92897e-05	1.18057	4.79678	49.6611	0.48996
2640	25.8896	77	713.184	5.92957e-05	1.18397	4.79988	49.8036	0.49074
2645	25.9386	77.125	713.193	5.93023e-05	1.18738	4.80298	49.9465	0.491519
2650	25.9876	77.25	713.203	5.93086e-05	1.1908	4.80608	50.0896	0.492299
2655	26.0367	77.375	713.214	5.93148e-05	1.19423	4.80919	50.233	0.493078
2660	26.0857	77.5	713.224	5.93208e-05	1.19769	4.81229	50.3778	0.493869
2665	26.1347	77.625	713.235	5.93272e-05	1.20116	4.8154	50.5232	0.494663
2670	26.1838	77.75	713.245	5.93335e-05	1.20465	4.8185	50.6689	0.495458
2675	26.2328	77.875	713.257	5.93397e-05	1.20813	4.82161	50.8148	0.496252
2680	26.2818	78	713.268	5.93458e-05	1.21163	4.82472	50.9609	0.497046
2685	26.3309	78.125	713.277	5.93521e-05	1.21513	4.82783	51.1075	0.497839
2690	26.3799	78.25	713.287	5.93582e-05	1.21863	4.83094	51.2543	0.498633
2695	26.4289	78.375	713.296	5.93643e-05	1.22215	4.83405	51.4013	0.499426
2700	26.478	78.5	713.306	5.93704e-05	1.22566	4.83717	51.5486	0.500219
2705	26.527	78.625	713.317	5.93768e-05	1.22919	4.84028	51.696	0.501012
2710	26.576	78.75	713.328	5.93831e-05	1.23272	4.8434	51.8437	0.501805
2715	26.6251	78.875	713.338	5.93892e-05	1.23626	4.84652	51.9917	0.502598
2720	26.6741	79	713.348	5.93954e-05	1.2398	4.84963	52.14	0.50339
2725	26.7231	79.125	713.357	5.94017e-05	1.24335	4.85275	52.2886	0.504182
2730	26.7722	79.25	713.367	5.94079e-05	1.2469	4.85587	52.4373	0.504975
2735	26.8212	79.375	713.376	5.94138e-05	1.25046	4.85899	52.5864	0.505767
2740	26.8702	79.5	713.385	5.94195e-05	1.25403	4.86211	52.7358	0.506559
2745	26.9193	79.625	713.393	5.94258e-05	1.2576	4.86523	52.8855	0.507351
2750	26.9683	79.75	713.401	5.94319e-05	1.26118	4.86835	53.0354	0.508143
2755	27.0173	79.875	713.408	5.94379e-05	1.26477	4.87147	53.1857	0.508935
2760	27.0664	80	713.416	5.94439e-05	1.26836	4.8746	53.3361	0.509726
2765	27.1154	80.125	713.428	5.94503e-05	1.27196	4.87772	53.4866	0.510518
2770	27.1644	80.25	713.439	5.94565e-05	1.27556	4.88084	53.6373	0.51131
2775	27.2135	80.375	713.45	5.94626e-05	1.27917	4.88396	53.7883	0.512102
2780	27.2625	80.5	713.46	5.94686e-05	1.28279	4.88709	53.9395	0.512893
2785	27.3115	80.625	713.468	5.94748e-05	1.28641	4.89021	54.0913	0.513685
2790	27.3606	80.75	713.476	5.9481e-05	1.29004	4.89333	54.2432	0.514477
2795	27.4096	80.875	713.485	5.94869e-05	1.29368	4.89645	54.3954	0.515269
2800	27.4586	81	713.495	5.94927e-05	1.29732	4.89957	54.5477	0.516061
2805	27.5077	81.125	713.504	5.94991e-05	1.30096	4.9027	54.7004	0.516853
2810	27.5567	81.25	713.512	5.95054e-05	1.30462	4.90582	54.8534	0.517645
2815	27.6057	81.375	713.52	5.95115e-05	1.30828	4.90894	55.0066	0.518437
2820	27.6548	81.5	713.529	5.95174e-05	1.31194	4.91206	55.16	0.519229
2825	27.7038	81.625	713.54	5.95234e-05	1.31561	4.91518	55.3136	0.520021
2830	27.7528	81.75	713.548	5.95293e-05	1.31929	4.9183	55.4675	0.520814
2835	27.8019	81.875	713.556	5.95352e-05	1.32298	4.92142	55.6218	0.521607
2840	27.8509	82	713.562	5.95409e-05	1.32667	4.92453	55.7764	0.522399
2845	27.8999	82.125	713.572	5.95473e-05	1.33036	4.92765	55.9311	0.523192
2850	27.949	82.25	713.582	5.95535e-05	1.33406	4.93077	56.0859	0.523985
2855	27.998	82.375	713.591	5.95597e-05	1.33777	4.93388	56.2411	0.524779
2860	28.047	82.5	713.6	5.95655e-05	1.34149	4.93699	56.3966	0.525572
2865	28.0961	82.625	713.606	5.95716e-05	1.34521	4.94011	56.5525	0.526366
2870	28.1451	82.75	713.613	5.95775e-05	1.34893	4.94322	56.7086	0.52716
2875	28.1941	82.875	713.621	5.95832e-05	1.35267	4.94631	56.8649	0.527958
2880	28.2432	83	713.63	5.95887e-05	1.35641	4.94938	57.0213	0.528761
2885	28.2922	83.125	713.639	5.95948e-05	1.36015	4.95244	57.1781	0.529565
2890	28.3412	83.25	713.648	5.96008e-05	1.3639	4.95551	57.3351	0.530369
2895	28.3903	83.375	713.656	5.96068e-05	1.36766	4.95857	57.4924	0.531174
2900	28.4393	83.5	713.664	5.96129e-05	1.37142	4.96163	57.65	0.531979
2905	28.4883	83.625	713.671	5.96192e-05	1.37519	4.96468	57.8078	0.532785
2910	28.5374	83.75	713.679	5.96252e-05	1.37897	4.96773	57.9659	0.533592
2915	28.5864	83.875	713.687	5.9631e-05	1.38275	4.97078	58.1242	0.534399
2920	28.6354	84	713.695	5.96366e-05	1.38654	4.97383	58.2828	0.535206
2925	28.6845	84.125	713.704	5.96426e-05	1.39033	4.97687	58.4416	0.536015
2930	28.7335	84.25	713.712	5.96486e-05	1.39413	4.97991	58.6006	0.536824
2935	28.7825	84.375	713.72	5.96546e-05	1.39794	4.98295	58.7599	0.537633
2940	28.8316	84.5	713.729	5.96605e-05	1.40175	4.98599	58.9195	0.538443
2945	28.8806	84.625	713.735	5.96665e-05	1.40557	4.98902	59.0795	0.539254
2950	28.9296	84.75	713.741	5.96723e-05	1.40939	4.99205	59.2398	0.540066
2955	28.9787	84.875	713.746	5.9678e-05	1.41323	4.99507	59.4003	0.540878
2960	29.0277	85	713.753	5.96836e-05	1.41706	4.99809	59.5611	0.541691
2965	29.0767	85.125	713.761	5.96896e-05	1.42091	5.00111	59.7219	0.542505
2970	29.1258	85.25	713.77	5.96955e-05	1.42475	5.00412	59.883	0.543319
2975	29.1748	85.375	713.778	5.97012e-05	1.42861	5.00714	60.0443	0.544135
2980	29.2238	85.5	713.787	5.97069e-05	1.43247	5.01014	60.2058	0.544951
2985	29.2729	85.625	713.793	5.97132e-05	1.43634	5.01315	60.3679	0.545768
2990	29.3219	85.75	713.799	5.97193e-05	1.44021	5.01615	60.5302	0.546585
2995	29.3709	85.875	713.805	5.97252e-05	1.44409	5.01914	60.6928	0.547404
3000	29.42	86	713.811	5.97308e-05	1.44798	5.02213	60.8556	0.548223

## Sheet: Figure 3ab
Input Parameters
Parameter				Combinations
				Min	Max	Step
Depth (m):				1000	5000	10
Defined hydrostatic pressure (MPa):				-1	-1	1
Thickness (m):				20	20	1
Permeability (mD):				15	15	1
Porosity (fraction):				0.2	0.2	0.005
Geothermal gradient (°C):				25	25	0.1
Temperature (°C):				-1	-1	1
Area (km2):				256	256	100
Maximum injection pressure (as fraction):				0.8	0.8	0.8
Maximum well injection rate (MtCO2/yr):				1	1	1
Injection period (years):				30	30	1
Realizations:				-
Depth	Uncapped				Capped
	Injection rate	Plume radius	Plume volume	Storage potential of plume	Injection rate	Plume radius	Plume volume	Storage potential of plume
m	MtCO2/yr	km	Mm3	MtCO2/km2	MtCO2/yr	km	Mm3	MtCO2/km2
1000	0.205114	2.85686	8.9169	0.239988	0.205114	2.85686	8.9169	0.239988
1010	0.207902	2.86801	9.03004	0.241362	0.207902	2.86801	9.03004	0.241362
1020	0.210717	2.87914	9.14416	0.242741	0.210717	2.87914	9.14416	0.242741
1030	0.213559	2.89027	9.25975	0.244124	0.213559	2.89027	9.25975	0.244124
1040	0.216428	2.90139	9.37604	0.245512	0.216428	2.90139	9.37604	0.245512
1050	0.219325	2.9125	9.49467	0.246904	0.219325	2.9125	9.49467	0.246904
1060	0.222249	2.9236	9.61334	0.248299	0.222249	2.9236	9.61334	0.248299
1070	0.2252	2.93468	9.73463	0.2497	0.2252	2.93468	9.73463	0.2497
1080	0.228179	2.94575	9.85585	0.251104	0.228179	2.94575	9.85585	0.251104
1090	0.231185	2.95682	9.97935	0.252512	0.231185	2.95682	9.97935	0.252512
1100	0.234218	2.96786	10.1035	0.253925	0.234218	2.96786	10.1035	0.253925
1110	0.23728	2.9789	10.2293	0.255341	0.23728	2.9789	10.2293	0.255341
1120	0.240368	2.98992	10.356	0.256762	0.240368	2.98992	10.356	0.256762
1130	0.243485	3.00092	10.4844	0.258187	0.243485	3.00092	10.4844	0.258187
1140	0.246629	3.01191	10.6134	0.259616	0.246629	3.01191	10.6134	0.259616
1150	0.249801	3.02289	10.7444	0.261049	0.249801	3.02289	10.7444	0.261049
1160	0.253	3.03384	10.8758	0.262486	0.253	3.03384	10.8758	0.262486
1170	0.256227	3.04479	11.0093	0.263927	0.256227	3.04479	11.0093	0.263927
1180	0.259483	3.05571	11.1432	0.265372	0.259483	3.05571	11.1432	0.265372
1190	0.262765	3.06662	11.2789	0.26682	0.262765	3.06662	11.2789	0.26682
1200	0.266076	3.07751	11.4156	0.268273	0.266076	3.07751	11.4156	0.268273
1210	0.269415	3.08839	11.5536	0.26973	0.269415	3.08839	11.5536	0.26973
1220	0.272781	3.09913	11.6926	0.27121	0.272781	3.09913	11.6926	0.27121
1230	0.276175	3.10969	11.8332	0.272722	0.276175	3.10969	11.8332	0.272722
1240	0.279597	3.12024	11.9745	0.274238	0.279597	3.12024	11.9745	0.274238
1250	0.283046	3.13076	12.1176	0.275759	0.283046	3.13076	12.1176	0.275759
1260	0.286524	3.14126	12.2613	0.277284	0.286524	3.14126	12.2613	0.277284
1270	0.290029	3.15174	12.4068	0.278813	0.290029	3.15174	12.4068	0.278813
1280	0.293562	3.16219	12.5529	0.280347	0.293562	3.16219	12.5529	0.280347
1290	0.297122	3.17262	12.7007	0.281884	0.297122	3.17262	12.7007	0.281884
1300	0.300711	3.18302	12.8494	0.283426	0.300711	3.18302	12.8494	0.283426
1310	0.304327	3.19341	12.9996	0.284973	0.304327	3.19341	12.9996	0.284973
1320	0.30797	3.20376	13.1506	0.286523	0.30797	3.20376	13.1506	0.286523
1330	0.311641	3.21409	13.3031	0.288078	0.311641	3.21409	13.3031	0.288078
1340	0.31534	3.2244	13.4565	0.289636	0.31534	3.2244	13.4565	0.289636
1350	0.319066	3.23467	13.6114	0.291199	0.319066	3.23467	13.6114	0.291199
1360	0.322819	3.24493	13.767	0.292766	0.322819	3.24493	13.767	0.292766
1370	0.326599	3.25515	13.9243	0.294337	0.326599	3.25515	13.9243	0.294337
1380	0.330407	3.26534	14.0825	0.295912	0.330407	3.26534	14.0825	0.295912
1390	0.334242	3.27551	14.2419	0.297491	0.334242	3.27551	14.2419	0.297491
1400	0.338104	3.28565	14.4023	0.299074	0.338104	3.28565	14.4023	0.299074
1410	0.341993	3.29576	14.5642	0.300661	0.341993	3.29576	14.5642	0.300661
1420	0.345909	3.30584	14.7269	0.302252	0.345909	3.30584	14.7269	0.302252
1430	0.349851	3.31589	14.891	0.303847	0.349851	3.31589	14.891	0.303847
1440	0.353821	3.32591	15.0559	0.305446	0.353821	3.32591	15.0559	0.305446
1450	0.357817	3.33589	15.2224	0.307049	0.357817	3.33589	15.2224	0.307049
1460	0.361629	3.34585	15.3808	0.308476	0.361629	3.34585	15.3808	0.308476
1470	0.365454	3.35577	15.5399	0.309898	0.365454	3.35577	15.5399	0.309898
1480	0.3693	3.36567	15.6997	0.311321	0.3693	3.36567	15.6997	0.311321
1490	0.373168	3.37552	15.8606	0.312747	0.373168	3.37552	15.8606	0.312747
1500	0.377056	3.38535	16.0222	0.314174	0.377056	3.38535	16.0222	0.314174
1510	0.380965	3.39514	16.185	0.315603	0.380965	3.39514	16.185	0.315603
1520	0.384895	3.4049	16.3483	0.317034	0.384895	3.4049	16.3483	0.317034
1530	0.388846	3.41462	16.5128	0.318467	0.388846	3.41462	16.5128	0.318467
1540	0.392817	3.42431	16.6779	0.319901	0.392817	3.42431	16.6779	0.319901
1550	0.396807	3.43396	16.8441	0.321337	0.396807	3.43396	16.8441	0.321337
1560	0.400818	3.44356	17.0108	0.322778	0.400818	3.44356	17.0108	0.322778
1570	0.404848	3.45187	17.1788	0.324455	0.404848	3.45187	17.1788	0.324455
1580	0.408898	3.46017	17.3474	0.32613	0.408898	3.46017	17.3474	0.32613
1590	0.412967	3.46846	17.5168	0.327802	0.412967	3.46846	17.5168	0.327802
1600	0.417055	3.47674	17.6869	0.329473	0.417055	3.47674	17.6869	0.329473
1610	0.421161	3.485	17.8581	0.331141	0.421161	3.485	17.8581	0.331141
1620	0.425286	3.49325	18.0298	0.332807	0.425286	3.49325	18.0298	0.332807
1630	0.429429	3.50149	18.2025	0.33447	0.429429	3.50149	18.2025	0.33447
1640	0.433591	3.50971	18.3757	0.336131	0.433591	3.50971	18.3757	0.336131
1650	0.43777	3.51792	18.5499	0.337789	0.43777	3.51792	18.5499	0.337789
1660	0.441966	3.52612	18.7246	0.339443	0.441966	3.52612	18.7246	0.339443
1670	0.44618	3.5343	18.9003	0.341095	0.44618	3.5343	18.9003	0.341095
1680	0.45041	3.54246	19.0766	0.342744	0.45041	3.54246	19.0766	0.342744
1690	0.454658	3.55061	19.2537	0.344389	0.454658	3.55061	19.2537	0.344389
1700	0.458921	3.55875	19.4312	0.346031	0.458921	3.55875	19.4312	0.346031
1710	0.462996	3.56687	19.601	0.347516	0.462996	3.56687	19.601	0.347516
1720	0.466701	3.57497	19.755	0.34871	0.466701	3.57497	19.755	0.34871
1730	0.470424	3.58306	19.91	0.349907	0.470424	3.58306	19.91	0.349907
1740	0.474165	3.59114	20.0656	0.351105	0.474165	3.59114	20.0656	0.351105
1750	0.477924	3.59919	20.222	0.352306	0.477924	3.59919	20.222	0.352306
1760	0.481701	3.60724	20.379	0.353508	0.481701	3.60724	20.379	0.353508
1770	0.485495	3.61526	20.5371	0.354712	0.485495	3.61526	20.5371	0.354712
1780	0.489307	3.62327	20.6958	0.355919	0.489307	3.62327	20.6958	0.355919
1790	0.493137	3.63126	20.8553	0.357127	0.493137	3.63126	20.8553	0.357127
1800	0.496984	3.63924	21.0154	0.358337	0.496984	3.63924	21.0154	0.358337
1810	0.503397	3.6472	21.284	0.361379	0.503397	3.6472	21.284	0.361379
1820	0.507771	3.65514	21.4664	0.362937	0.507771	3.65514	21.4664	0.362937
1830	0.512179	3.66307	21.6502	0.364505	0.512179	3.66307	21.6502	0.364505
1840	0.51662	3.67097	21.8355	0.366084	0.51662	3.67097	21.8355	0.366084
1850	0.521094	3.67886	22.0223	0.367672	0.521094	3.67886	22.0223	0.367672
1860	0.5256	3.68673	22.2103	0.36927	0.5256	3.68673	22.2103	0.36927
1870	0.530138	3.69458	22.3998	0.370876	0.530138	3.69458	22.3998	0.370876
1880	0.534706	3.70242	22.5905	0.372491	0.534706	3.70242	22.5905	0.372491
1890	0.539304	3.71023	22.7825	0.374113	0.539304	3.71023	22.7825	0.374113
1900	0.543932	3.71803	22.9756	0.375742	0.543932	3.71803	22.9756	0.375742
1910	0.548588	3.72581	23.1701	0.377377	0.548588	3.72581	23.1701	0.377377
1920	0.553271	3.73357	23.3656	0.379019	0.553271	3.73357	23.3656	0.379019
1930	0.557982	3.74131	23.5622	0.380666	0.557982	3.74131	23.5622	0.380666
1940	0.562718	3.74903	23.7599	0.382317	0.562718	3.74903	23.7599	0.382317
1950	0.567479	3.75673	23.9589	0.383973	0.567479	3.75673	23.9589	0.383973
1960	0.572263	3.76441	24.1587	0.385632	0.572263	3.76441	24.1587	0.385632
1970	0.577071	3.77207	24.3597	0.387294	0.577071	3.77207	24.3597	0.387294
1980	0.581901	3.77971	24.5615	0.388958	0.581901	3.77971	24.5615	0.388958
1990	0.586752	3.78733	24.7641	0.390623	0.586752	3.78733	24.7641	0.390623
2000	0.591622	3.79493	24.9675	0.39229	0.591622	3.79493	24.9675	0.39229
2010	0.596511	3.80251	25.1718	0.393956	0.596511	3.80251	25.1718	0.393956
2020	0.601418	3.81007	25.3768	0.395623	0.601418	3.81007	25.3768	0.395623
2030	0.606341	3.81761	25.5825	0.397288	0.606341	3.81761	25.5825	0.397288
2040	0.611278	3.82513	25.7889	0.398951	0.611278	3.82513	25.7889	0.398951
2050	0.61623	3.83262	25.9958	0.400611	0.61623	3.83262	25.9958	0.400611
2060	0.621195	3.84009	26.2033	0.402268	0.621195	3.84009	26.2033	0.402268
2070	0.62617	3.84754	26.4114	0.403922	0.62617	3.84754	26.4114	0.403922
2080	0.631156	3.85497	26.6196	0.40557	0.631156	3.85497	26.6196	0.40557
2090	0.63615	3.86238	26.8283	0.407213	0.63615	3.86238	26.8283	0.407213
2100	0.641152	3.86976	27.0373	0.40885	0.641152	3.86976	27.0373	0.40885
2110	0.646151	3.87712	27.2465	0.410474	0.646151	3.87712	27.2465	0.410474
2120	0.650804	3.88446	27.4409	0.411869	0.650804	3.88446	27.4409	0.411869
2130	0.655468	3.89178	27.6357	0.413263	0.655468	3.89178	27.6357	0.413263
2140	0.660144	3.89907	27.831	0.414656	0.660144	3.89907	27.831	0.414656
2150	0.664832	3.90634	28.0268	0.416048	0.664832	3.90634	28.0268	0.416048
2160	0.669534	3.91359	28.2231	0.41744	0.669534	3.91359	28.2231	0.41744
2170	0.674248	3.92081	28.4202	0.418832	0.674248	3.92081	28.4202	0.418832
2180	0.678977	3.92801	28.6177	0.420225	0.678977	3.92801	28.6177	0.420225
2190	0.683719	3.93518	28.8158	0.421619	0.683719	3.93518	28.8158	0.421619
2200	0.688476	3.94233	29.0146	0.423014	0.688476	3.94233	29.0146	0.423014
2210	0.693249	3.94946	29.2142	0.424411	0.693249	3.94946	29.2142	0.424411
2220	0.698038	3.95656	29.4143	0.42581	0.698038	3.95656	29.4143	0.42581
2230	0.702843	3.96363	29.6152	0.427212	0.702843	3.96363	29.6152	0.427212
2240	0.707666	3.97068	29.8166	0.428617	0.707666	3.97068	29.8166	0.428617
2250	0.712507	3.97771	30.0189	0.430025	0.712507	3.97771	30.0189	0.430025
2260	0.717366	3.98471	30.2221	0.431438	0.717366	3.98471	30.2221	0.431438
2270	0.722244	3.99169	30.4263	0.432855	0.722244	3.99169	30.4263	0.432855
2280	0.727143	3.99864	30.631	0.434278	0.727143	3.99864	30.631	0.434278
2290	0.732063	4.00556	30.8366	0.435706	0.732063	4.00556	30.8366	0.435706
2300	0.737004	4.01246	31.0432	0.43714	0.737004	4.01246	31.0432	0.43714
2310	0.741968	4.01933	31.2508	0.438581	0.741968	4.01933	31.2508	0.438581
2320	0.746956	4.02617	31.4591	0.440029	0.746956	4.02617	31.4591	0.440029
2330	0.751771	4.03299	31.6605	0.441369	0.751771	4.03299	31.6605	0.441369
2340	0.756307	4.03979	31.8501	0.44254	0.756307	4.03979	31.8501	0.44254
2350	0.76087	4.04655	32.0408	0.443723	0.76087	4.04655	32.0408	0.443723
2360	0.765461	4.05329	32.2325	0.444918	0.765461	4.05329	32.2325	0.444918
2370	0.77008	4.06	32.4257	0.446124	0.77008	4.06	32.4257	0.446124
2380	0.774727	4.06668	32.62	0.447341	0.774727	4.06668	32.62	0.447341
2390	0.779302	4.07326	32.8111	0.448531	0.779302	4.07326	32.8111	0.448531
2400	0.783849	4.07884	33.0011	0.449915	0.783849	4.07884	33.0011	0.449915
2410	0.788408	4.08441	33.1918	0.451298	0.788408	4.08441	33.1918	0.451298
2420	0.792981	4.08998	33.383	0.452681	0.792981	4.08998	33.383	0.452681
2430	0.797566	4.09554	33.5746	0.454063	0.797566	4.09554	33.5746	0.454063
2440	0.802164	4.10109	33.7667	0.455445	0.802164	4.10109	33.7667	0.455445
2450	0.806775	4.10664	33.9593	0.456826	0.806775	4.10664	33.9593	0.456826
2460	0.811398	4.11218	34.1525	0.458207	0.811398	4.11218	34.1525	0.458207
2470	0.816034	4.11771	34.3465	0.459587	0.816034	4.11771	34.3465	0.459587
2480	0.820682	4.12324	34.541	0.460966	0.820682	4.12324	34.541	0.460966
2490	0.825342	4.12876	34.7358	0.462345	0.825342	4.12876	34.7358	0.462345
2500	0.830015	4.13427	34.9311	0.463723	0.830015	4.13427	34.9311	0.463723
2510	0.8347	4.13978	35.127	0.4651	0.8347	4.13978	35.127	0.4651
2520	0.839397	4.14528	35.3235	0.466477	0.839397	4.14528	35.3235	0.466477
2530	0.844105	4.15078	35.5203	0.467853	0.844105	4.15078	35.5203	0.467853
2540	0.848826	4.15626	35.7176	0.469228	0.848826	4.15626	35.7176	0.469228
2550	0.853558	4.16174	35.9155	0.470602	0.853558	4.16174	35.9155	0.470602
2560	0.858302	4.16722	36.1139	0.471975	0.858302	4.16722	36.1139	0.471975
2570	0.863057	4.17268	36.3127	0.473347	0.863057	4.17268	36.3127	0.473347
2580	0.867824	4.17814	36.5119	0.474719	0.867824	4.17814	36.5119	0.474719
2590	0.872603	4.1836	36.7119	0.476089	0.872603	4.1836	36.7119	0.476089
2600	0.877392	4.18904	36.912	0.477458	0.877392	4.18904	36.912	0.477458
2610	0.882193	4.19448	37.1129	0.478827	0.882193	4.19448	37.1129	0.478827
2620	0.887004	4.19991	37.3142	0.480194	0.887004	4.19991	37.3142	0.480194
2630	0.891827	4.20534	37.5158	0.48156	0.891827	4.20534	37.5158	0.48156
2640	0.89666	4.21075	37.7179	0.482925	0.89666	4.21075	37.7179	0.482925
2650	0.901504	4.21616	37.9206	0.484289	0.901504	4.21616	37.9206	0.484289
2660	0.906359	4.22156	38.1237	0.485652	0.906359	4.22156	38.1237	0.485652
2670	0.911224	4.22696	38.3272	0.487013	0.911224	4.22696	38.3272	0.487013
2680	0.9161	4.23235	38.5311	0.488373	0.9161	4.23235	38.5311	0.488373
2690	0.920986	4.23773	38.7356	0.489732	0.920986	4.23773	38.7356	0.489732
2700	0.925882	4.2431	38.9404	0.49109	0.925882	4.2431	38.9404	0.49109
2710	0.930788	4.24846	39.1456	0.492446	0.930788	4.24846	39.1456	0.492446
2720	0.935704	4.25382	39.3512	0.493801	0.935704	4.25382	39.3512	0.493801
2730	0.940629	4.25917	39.5573	0.495154	0.940629	4.25917	39.5573	0.495154
2740	0.945565	4.26451	39.7638	0.496506	0.945565	4.26451	39.7638	0.496506
2750	0.95051	4.26984	39.9709	0.497856	0.95051	4.26984	39.9709	0.497856
2760	0.955464	4.27517	40.1784	0.499205	0.955464	4.27517	40.1784	0.499205
2770	0.960428	4.28049	40.3859	0.500552	0.960428	4.28049	40.3859	0.500552
2780	0.965401	4.2858	40.5938	0.501898	0.965401	4.2858	40.5938	0.501898
2790	0.970383	4.2911	40.8023	0.503242	0.970383	4.2911	40.8023	0.503242
2800	0.975374	4.2964	41.0111	0.504585	0.975374	4.2964	41.0111	0.504585
2810	0.980374	4.30168	41.2204	0.505926	0.980374	4.30168	41.2204	0.505926
2820	0.985383	4.30696	41.4299	0.507265	0.985383	4.30696	41.4299	0.507265
2830	0.9904	4.31223	41.6398	0.508602	0.9904	4.31223	41.6398	0.508602
2840	0.995425	4.31749	41.8502	0.509938	0.995425	4.31749	41.8502	0.509938
2850	1.00046	4.32275	42.0607	0.51127	1	4.332	42.0414	0.508855
2860	1.0055	4.32806	42.2716	0.512587	1	4.32951	42.0404	0.509442
2870	1.01055	4.33337	42.4832	0.513899	1	4.32703	42.0396	0.510025
2880	1.01561	4.33868	42.6948	0.515208	1	4.32458	42.0386	0.510604
2890	1.02068	4.34399	42.9067	0.516514	1	4.32214	42.0375	0.51118
2900	1.02575	4.34929	43.119	0.517817	1	4.31972	42.0366	0.511753
2910	1.03083	4.35459	43.3317	0.519116	1	4.31732	42.0357	0.512322
2920	1.03592	4.35988	43.5446	0.520413	1	4.31493	42.0347	0.512888
2930	1.04101	4.36517	43.7577	0.521706	1	4.31257	42.0338	0.513451
2940	1.04569	4.37045	43.9531	0.522782	1	4.31085	42.0328	0.513861
2950	1.05031	4.37572	44.1468	0.523831	1	4.30922	42.0321	0.514251
2960	1.05497	4.38098	44.3416	0.524887	1	4.30756	42.0314	0.514646
2970	1.05965	4.38624	44.5376	0.525957	1	4.30587	42.0304	0.515049
2980	1.06439	4.3915	44.7354	0.527042	1	4.30414	42.0293	0.515463
2990	1.06917	4.39674	44.9358	0.528149	1	4.30235	42.0286	0.515892
3000	1.07402	4.40199	45.1388	0.529281	1	4.3005	42.0279	0.516338
3010	1.07894	4.40722	45.3448	0.530443	1	4.29855	42.0271	0.516805
3020	1.08395	4.41245	45.5544	0.531642	1	4.29651	42.0264	0.517297
3030	1.08905	4.41767	45.7679	0.532882	1	4.29435	42.0256	0.517817
3040	1.09426	4.42289	45.986	0.53417	1	4.29206	42.0248	0.51837
3050	1.09959	4.4281	46.2091	0.535512	1	4.28962	42.0238	0.518959
3060	1.10474	4.4333	46.4247	0.536757	1	4.28747	42.0232	0.519481
3070	1.1097	4.43848	46.6325	0.53791	1	4.28558	42.0224	0.519939
3080	1.11467	4.44366	46.8403	0.53906	1	4.2837	42.0216	0.520394
3090	1.11964	4.44882	47.0481	0.540206	1	4.28184	42.0207	0.520846
3100	1.12461	4.45397	47.256	0.541349	1	4.28	42.0199	0.521296
3110	1.12958	4.45912	47.4639	0.542488	1	4.27816	42.0191	0.521743
3120	1.13455	4.46425	47.6718	0.543624	1	4.27634	42.0183	0.522188
3130	1.13952	4.46937	47.8802	0.544757	1	4.27453	42.0177	0.522631
3140	1.1445	4.47448	48.0884	0.545886	1	4.27273	42.0171	0.523071
3150	1.14947	4.47957	48.2967	0.547013	1	4.27094	42.0163	0.52351
3160	1.15445	4.48466	48.5048	0.548138	1	4.26916	42.0154	0.523947
3170	1.15943	4.48973	48.7132	0.54926	1	4.26739	42.0146	0.524382
3180	1.16442	4.49478	48.9216	0.550379	1	4.26562	42.0138	0.524815
3190	1.1694	4.49983	49.1303	0.551497	1	4.26387	42.0132	0.525247
3200	1.17439	4.50486	49.3393	0.552613	1	4.26212	42.0127	0.525678
3210	1.17938	4.50988	49.5482	0.553726	1	4.26038	42.0121	0.526107
3220	1.18437	4.51489	49.7571	0.554838	1	4.25865	42.0113	0.526536
3230	1.18937	4.51988	49.9662	0.555949	1	4.25692	42.0107	0.526963
3240	1.19437	4.52485	50.1756	0.557058	1	4.2552	42.0102	0.52739
3250	1.19937	4.52982	50.3848	0.558166	1	4.25348	42.0094	0.527816
3260	1.20437	4.53476	50.5941	0.559273	1	4.25176	42.0086	0.528242
3270	1.20938	4.53969	50.8037	0.560379	1	4.25005	42.0079	0.528667
3280	1.2144	4.54461	51.0137	0.561485	1	4.24835	42.0074	0.529092
3290	1.21941	4.54951	51.2236	0.56259	1	4.24664	42.0068	0.529517
3300	1.22443	4.5544	51.4335	0.563695	1	4.24494	42.006	0.529942
3310	1.22946	4.55927	51.6438	0.564799	1	4.24324	42.0054	0.530367
3320	1.23449	4.56413	51.8544	0.565904	1	4.24154	42.0048	0.530793
3330	1.23952	4.56896	52.0651	0.567008	1	4.23984	42.0043	0.531219
3340	1.24456	4.57379	52.2761	0.568113	1	4.23814	42.0037	0.531645
3350	1.2496	4.57859	52.487	0.569219	1	4.23644	42.003	0.532072
3360	1.25465	4.58338	52.6982	0.570325	1	4.23473	42.0022	0.532499
3370	1.25971	4.58815	52.9097	0.571432	1	4.23303	42.0016	0.532928
3380	1.26477	4.59291	53.1216	0.57254	1	4.23133	42.0011	0.533358
3390	1.26983	4.59765	53.3337	0.573649	1	4.22962	42.0005	0.533789
3400	1.27491	4.60237	53.5458	0.57476	1	4.22791	41.9998	0.534221
3410	1.27999	4.60707	53.7584	0.575872	1	4.22619	41.9993	0.534654
3420	1.28507	4.61176	53.9714	0.576986	1	4.22447	41.9987	0.535089
3430	1.29017	4.61643	54.1847	0.578102	1	4.22275	41.9982	0.535526
3440	1.29527	4.62108	54.3983	0.57922	1	4.22102	41.9978	0.535964
3450	1.30038	4.62571	54.6118	0.58034	1	4.21929	41.997	0.536404
3460	1.30549	4.63033	54.8258	0.581463	1	4.21755	41.9963	0.536847
3470	1.31062	4.63493	55.0407	0.582588	1	4.21581	41.996	0.537291
3480	1.31575	4.63951	55.2558	0.583716	1	4.21406	41.9957	0.537738
3490	1.32089	4.64407	55.4711	0.584847	1	4.2123	41.9951	0.538187
3500	1.32604	4.64861	55.6867	0.585981	1	4.21053	41.9946	0.538638
3510	1.33121	4.65313	55.9024	0.587118	1	4.20876	41.9938	0.539093
3520	1.33638	4.65764	56.1186	0.588259	1	4.20698	41.9931	0.53955
3530	1.34156	4.66213	56.3358	0.589404	1	4.20518	41.9928	0.540009
3540	1.34675	4.6666	56.5532	0.590552	1	4.20338	41.9923	0.540472
3550	1.35196	4.67105	56.7709	0.591705	1	4.20157	41.9917	0.540938
3560	1.35717	4.67548	56.9891	0.592861	1	4.19975	41.9911	0.541407
3570	1.3624	4.67989	57.2078	0.594022	1	4.19792	41.9906	0.541879
3580	1.36763	4.68429	57.4271	0.595188	1	4.19608	41.9901	0.542355
3590	1.37289	4.68866	57.647	0.596359	1	4.19423	41.9897	0.542834
3600	1.37815	4.69302	57.8675	0.597534	1	4.19237	41.9892	0.543317
3610	1.38343	4.69736	58.0881	0.598715	1	4.19049	41.9886	0.543803
3620	1.38872	4.70168	58.3094	0.599901	1	4.1886	41.988	0.544294
3630	1.39402	4.70598	58.5318	0.601092	1	4.1867	41.9877	0.544788
3640	1.39934	4.71026	58.7548	0.602289	1	4.18478	41.9875	0.545287
3650	1.40468	4.71453	58.978	0.603492	1	4.18286	41.9869	0.54579
3660	1.41003	4.71877	59.2018	0.604701	1	4.18091	41.9863	0.546297
3670	1.41539	4.723	59.4259	0.605917	1	4.17896	41.9855	0.546809
3680	1.42077	4.7272	59.6513	0.607139	1	4.17699	41.9851	0.547325
3690	1.42617	4.73139	59.8775	0.608367	1	4.175	41.9847	0.547846
3700	1.43159	4.73556	60.1044	0.609602	1	4.173	41.9844	0.548371
3710	1.43702	4.73971	60.3316	0.610845	1	4.17098	41.9838	0.548901
3720	1.44248	4.74385	60.56	0.612094	1	4.16895	41.9834	0.549437
3730	1.44795	4.74796	60.7889	0.613351	1	4.1669	41.9829	0.549977
3740	1.45344	4.75206	61.0188	0.614615	1	4.16484	41.9825	0.550523
3750	1.45894	4.75614	61.2495	0.615888	1	4.16275	41.9821	0.551074
3760	1.46447	4.7602	61.4809	0.617168	1	4.16066	41.9815	0.55163
3770	1.47002	4.76424	61.713	0.618456	1	4.15854	41.981	0.552192
3780	1.4756	4.76826	61.9462	0.619753	1	4.1564	41.9804	0.552759
3790	1.48119	4.77227	62.1803	0.621058	1	4.15425	41.98	0.553332
3800	1.4868	4.77626	62.4154	0.622372	1	4.15208	41.9796	0.553911
3810	1.49244	4.78023	62.6515	0.623694	1	4.14989	41.9792	0.554495
3820	1.4981	4.78418	62.8887	0.625026	1	4.14768	41.9789	0.555086
3830	1.50383	4.78813	63.1285	0.626379	1	4.14543	41.9785	0.555689
3840	1.50959	4.79208	63.3695	0.627741	1	4.14317	41.9781	0.556297
3850	1.51535	4.79602	63.6107	0.629103	1	4.1409	41.9775	0.556905
3860	1.52112	4.79995	63.8525	0.630467	1	4.13864	41.9772	0.557513
3870	1.52691	4.80387	64.0945	0.631831	1	4.13639	41.9767	0.558122
3880	1.5327	4.80778	64.3371	0.633196	1	4.13413	41.9764	0.558731
3890	1.53849	4.81168	64.5795	0.634562	1	4.13188	41.9758	0.55934
3900	1.5443	4.81557	64.8225	0.635929	1	4.12963	41.9753	0.559949
3910	1.55011	4.81944	65.0657	0.637296	1	4.12739	41.9748	0.560558
3920	1.55594	4.82331	65.3095	0.638664	1	4.12515	41.9744	0.561167
3930	1.56177	4.82717	65.5535	0.640032	1	4.12291	41.974	0.561776
3940	1.5676	4.83102	65.798	0.641401	1	4.12068	41.9736	0.562386
3950	1.57345	4.83486	66.0428	0.642771	1	4.11845	41.9733	0.562995
3960	1.5793	4.83869	66.2878	0.644141	1	4.11622	41.9729	0.563604
3970	1.58516	4.84251	66.533	0.645511	1	4.114	41.9724	0.564213
3980	1.59103	4.84632	66.7785	0.646881	1	4.11178	41.9719	0.564821
3990	1.5969	4.85013	67.0244	0.648252	1	4.10957	41.9715	0.56543
4000	1.60279	4.85392	67.2708	0.649623	1	4.10736	41.9712	0.566038
4010	1.60867	4.85771	67.5173	0.650994	1	4.10516	41.9707	0.566646
4020	1.61457	4.86148	67.7639	0.652365	1	4.10296	41.9702	0.567253
4030	1.62047	4.86525	68.0109	0.653736	1	4.10077	41.9697	0.56786
4040	1.62639	4.86902	68.2582	0.655107	1	4.09858	41.9693	0.568467
4050	1.6323	4.87277	68.506	0.656478	1	4.09639	41.9689	0.569073
4060	1.63823	4.87652	68.754	0.657849	1	4.09422	41.9686	0.569679
4070	1.64416	4.88025	69.0025	0.65922	1	4.09204	41.9683	0.570283
4080	1.6501	4.88398	69.2512	0.66059	1	4.08988	41.968	0.570888
4090	1.65604	4.88771	69.5	0.66196	1	4.08772	41.9676	0.571491
4100	1.66199	4.89142	69.749	0.663329	1	4.08556	41.9672	0.572094
4110	1.66795	4.89513	69.9983	0.664698	1	4.08341	41.9667	0.572697
4120	1.67391	4.89884	70.2481	0.666067	1	4.08127	41.9664	0.573298
4130	1.67988	4.90253	70.4981	0.667435	1	4.07914	41.9662	0.573898
4140	1.68586	4.90622	70.7482	0.668802	1	4.07701	41.9658	0.574498
4150	1.69184	4.90991	70.9985	0.670168	1	4.07488	41.9653	0.575097
4160	1.69783	4.91358	71.2489	0.671534	1	4.07277	41.9648	0.575694
4170	1.70382	4.91725	71.4997	0.672899	1	4.07066	41.9644	0.576291
4180	1.70982	4.92092	71.7511	0.674263	1	4.06856	41.9642	0.576887
4190	1.71582	4.92458	72.0023	0.675625	1	4.06646	41.9637	0.577481
4200	1.72183	4.92823	72.2538	0.676987	1	4.06438	41.9633	0.578074
4210	1.72785	4.93188	72.5054	0.678348	1	4.0623	41.9628	0.578667
4220	1.73387	4.93552	72.7575	0.679708	1	4.06022	41.9625	0.579257
4230	1.7399	4.93916	73.0098	0.681066	1	4.05816	41.9621	0.579847
4240	1.74593	4.94279	73.2622	0.682423	1	4.0561	41.9617	0.580435
4250	1.75197	4.94642	73.515	0.683779	1	4.05405	41.9614	0.581022
4260	1.75801	4.95004	73.7684	0.685133	1	4.05201	41.9613	0.581607
4270	1.76406	4.95366	74.0213	0.686485	1	4.04998	41.9608	0.582191
4280	1.77011	4.95728	74.2748	0.687836	1	4.04796	41.9605	0.582773
4290	1.77617	4.96089	74.528	0.689186	1	4.04594	41.96	0.583354
4300	1.78223	4.96449	74.7816	0.690533	1	4.04394	41.9596	0.583933
4310	1.78829	4.9681	75.0356	0.691879	1	4.04194	41.9593	0.58451
4320	1.79437	4.9717	75.2899	0.693223	1	4.03995	41.9591	0.585086
4330	1.80044	4.97529	75.544	0.694565	1	4.03797	41.9586	0.58566
4340	1.80652	4.97888	75.7985	0.695906	1	4.036	41.9583	0.586232
4350	1.8126	4.98247	76.0527	0.697243	1	4.03404	41.9577	0.586802
4360	1.81869	4.98606	76.3074	0.698579	1	4.03209	41.9573	0.58737
4370	1.82478	4.98964	76.5624	0.699913	1	4.03014	41.9569	0.587936
4380	1.83088	4.99322	76.8174	0.701244	1	4.02821	41.9566	0.5885
4390	1.83698	4.9968	77.0726	0.702573	1	4.02629	41.9562	0.589062
4400	1.84308	5.00038	77.3283	0.7039	1	4.02438	41.9559	0.589622
4410	1.84919	5.00395	77.5841	0.705224	1	4.02248	41.9557	0.59018
4420	1.8553	5.00752	77.8398	0.706545	1	4.02058	41.9553	0.590736
4430	1.86142	5.01109	78.0956	0.707864	1	4.0187	41.9549	0.591289
4440	1.86753	5.01466	78.3514	0.70918	1	4.01683	41.9545	0.59184
4450	1.87365	5.01823	78.6075	0.710493	1	4.01497	41.9541	0.592389
4460	1.87978	5.02179	78.8642	0.711803	1	4.01312	41.954	0.592935
4470	1.8859	5.02536	79.1204	0.713111	1	4.01128	41.9536	0.593479
4480	1.89203	5.02892	79.377	0.714415	1	4.00945	41.9532	0.59402
4490	1.89817	5.03248	79.6333	0.715716	1	4.00764	41.9527	0.594559
4500	1.9043	5.03605	79.8898	0.717014	1	4.00583	41.9522	0.595095
4510	1.91044	5.03961	80.1468	0.718309	1	4.00404	41.952	0.595628
4520	1.91658	5.04317	80.4038	0.7196	1	4.00225	41.9517	0.596159
4530	1.92273	5.04673	80.6608	0.720888	1	4.00048	41.9513	0.596687
4540	1.92887	5.05029	80.9178	0.722173	1	3.99872	41.9509	0.597212
4550	1.93502	5.05386	81.1751	0.723454	1	3.99698	41.9505	0.597734
4560	1.94117	5.05742	81.4328	0.724731	1	3.99524	41.9504	0.598254
4570	1.94732	5.06098	81.6901	0.726004	1	3.99352	41.95	0.59877
4580	1.95347	5.06455	81.9476	0.727274	1	3.99181	41.9497	0.599283
4590	1.95963	5.06811	82.2049	0.72854	1	3.99011	41.9492	0.599793
4600	1.96579	5.07168	82.4623	0.729802	1	3.98842	41.9487	0.600301
4610	1.97195	5.07524	82.7202	0.731059	1	3.98675	41.9485	0.600805
4620	1.97811	5.07881	82.978	0.732313	1	3.98509	41.9482	0.601305
4630	1.98427	5.08238	83.2359	0.733562	1	3.98344	41.9479	0.601803
4640	1.99043	5.08557	83.4936	0.734918	1	3.98151	41.9475	0.602388
4650	1.9966	5.08869	83.7515	0.736291	1	3.97953	41.9471	0.602986
4660	2.00276	5.0918	84.0098	0.737663	1	3.97756	41.947	0.603584
4670	2.00893	5.09491	84.2678	0.739033	1	3.9756	41.9466	0.604181
4680	2.0151	5.098	84.5259	0.740402	1	3.97364	41.9463	0.604777
4690	2.02126	5.10109	84.7838	0.741769	1	3.97169	41.9459	0.605371
4700	2.02743	5.10417	85.0416	0.743134	1	3.96974	41.9454	0.605964
4710	2.0336	5.10725	85.2998	0.744498	1	3.96781	41.9452	0.606556
4720	2.03977	5.11032	85.5581	0.74586	1	3.96588	41.9449	0.607146
4730	2.04594	5.11338	85.8159	0.74722	1	3.96395	41.9444	0.607735
4740	2.05211	5.11644	86.0743	0.748579	1	3.96204	41.9442	0.608323
4750	2.05828	5.11949	86.3325	0.749935	1	3.96013	41.9439	0.608909
4760	2.06445	5.12253	86.5903	0.75129	1	3.95823	41.9435	0.609494
4770	2.07062	5.12557	86.848	0.752643	1	3.95634	41.9429	0.610078
4780	2.07679	5.1286	87.1062	0.753994	1	3.95445	41.9426	0.61066
4790	2.08296	5.13162	87.3641	0.755342	1	3.95257	41.9422	0.61124
4800	2.08913	5.13464	87.622	0.756689	1	3.9507	41.9418	0.611819
4810	2.0953	5.13765	87.8804	0.758033	1	3.94884	41.9416	0.612396
4820	2.10147	5.14066	88.1385	0.759375	1	3.94699	41.9414	0.612971
4830	2.10764	5.14366	88.3966	0.760715	1	3.94514	41.9411	0.613545
4840	2.1138	5.14666	88.6545	0.762052	1	3.9433	41.9408	0.614117
4850	2.11997	5.14965	88.9122	0.763387	1	3.94147	41.9403	0.614688
4860	2.12613	5.15264	89.17	0.76472	1	3.93965	41.94	0.615256
4870	2.13229	5.15562	89.4279	0.76605	1	3.93784	41.9397	0.615823
4880	2.13846	5.1586	89.6859	0.767377	1	3.93603	41.9396	0.616388
4890	2.14462	5.16157	89.9435	0.768702	1	3.93423	41.9392	0.616951
4900	2.15077	5.16453	90.2011	0.770024	1	3.93245	41.9389	0.617512
4910	2.15693	5.1675	90.4582	0.771343	1	3.93067	41.9384	0.618072
4920	2.16309	5.17045	90.7156	0.772659	1	3.9289	41.938	0.618629
4930	2.16924	5.17341	90.9729	0.773973	1	3.92714	41.9377	0.619184
4940	2.17539	5.17635	91.2304	0.775284	1	3.92538	41.9375	0.619737
4950	2.18154	5.1793	91.4873	0.776591	1	3.92364	41.9371	0.620288
4960	2.18769	5.18224	91.7443	0.777896	1	3.9219	41.9367	0.620837
4970	2.19383	5.18517	92.0009	0.779197	1	3.92018	41.9362	0.621384
4980	2.19997	5.18811	92.2573	0.780496	1	3.91846	41.9357	0.621928
4990	2.20611	5.19104	92.5143	0.781791	1	3.91675	41.9355	0.622471
5000	2.21225	5.19396	92.7708	0.783083	1	3.91506	41.9351	0.623011

## Sheet: Figure 3cd
Input Parameters
Parameter				Combinations
				Min	Max	Step
Depth (m):				1000	5000	10
Defined hydrostatic pressure (MPa):				-1	-1	1
Thickness (m):				20	20	1
Permeability (mD):				15	15	1
Porosity (fraction):				0.2	0.2	0.005
Geothermal gradient (°C):				25	25	0.1
Temperature (°C):				-1	-1	1
Area (km2):				256	256	100
Maximum injection pressure (as fraction):				0.8	0.8	0.8
Maximum well injection rate (MtCO2/yr):				1	1	1
Injection period (years):				30	30	1
Realizations:				-
Depth	Reservoir capacity	Reservoir capacity	Number of wells	Number of wells	Cost	Cost
m	MtCO2	MtCO2	#	#	$/tCO2	$/tCO2
1000	54.8446	55.1591	8.91289	8.84401	5.70466	5.67529
1010	55.1588	55.3168	8.84373	8.81	5.68497	5.67529
1020	55.4739	55.4749	8.77543	8.77628	5.66543	5.6656
1030	55.79	55.791	8.70798	8.70881	5.64609	5.64626
1040	56.1071	56.108	8.64136	8.64219	5.62684	5.62707
1050	56.4251	56.4261	8.57557	8.57639	5.60795	5.60037
1060	56.7441	56.7451	8.5106	8.5114	5.58904	5.57382
1070	57.0641	57.065	8.44643	8.44722	5.53191	5.54747
1080	57.385	57.3859	8.38305	8.38383	5.51335	5.52127
1090	57.7068	57.7078	8.32045	8.32122	5.49511	5.49527
1100	58.0296	58.0306	8.25862	8.25939	5.47695	5.47713
1110	58.3534	58.3543	8.19756	8.19831	5.45902	5.45918
1120	58.6781	58.679	8.13724	8.13799	5.4412	5.44137
1130	59.0037	59.0046	8.07767	8.0784	5.4236	5.42374
1140	59.3302	59.3312	8.01883	8.01955	5.40607	5.40626
1150	59.6577	59.6586	7.96071	7.96142	5.38881	5.38895
1160	59.9861	59.987	7.9033	7.904	5.3716	5.37178
1170	60.3154	60.3163	7.8466	7.84729	5.35465	5.35478
1180	60.6456	60.6465	7.79058	7.79127	5.33776	5.33792
1190	60.9767	60.9776	7.73526	7.73593	5.32108	5.32123
1200	61.3087	61.3105	7.6806	7.68138	5.30453	5.30466
1210	61.6417	61.6465	7.62662	7.62776	5.28815	5.28498
1220	61.9799	61.9856	7.57384	7.57505	5.2718	5.2654
1230	62.3255	62.3277	7.52246	7.52324	5.23935	5.24595
1240	62.672	62.673	7.47171	7.47233	5.22319	5.22659
1250	63.0195	63.0205	7.42157	7.42218	5.20725	5.20737
1260	63.368	63.3689	7.37204	7.37264	5.19137	5.19153
1270	63.7174	63.7184	7.32311	7.3237	5.17571	5.17584
1280	64.0679	64.0689	7.27477	7.27536	5.16013	5.16028
1290	64.4193	64.4203	7.22702	7.2276	5.14474	5.14488
1300	64.7717	64.7727	7.17985	7.18042	5.12946	5.1296
1310	65.1251	65.126	7.13324	7.13381	5.11435	5.11448
1320	65.4794	65.4803	7.0872	7.08776	5.09934	5.09949
1330	65.8347	65.8356	7.04172	7.04227	5.08451	5.08464
1340	66.1909	66.1918	6.99678	6.99732	5.06977	5.06992
1350	66.548	66.549	6.95239	6.95293	5.05521	5.05168
1360	66.9061	66.9071	6.90853	6.90906	5.04074	5.03357
1370	67.2652	67.2661	6.86521	6.86573	5.00815	5.01559
1380	67.6251	67.626	6.8224	6.82292	4.99395	4.99775
1390	67.986	67.9869	6.78011	6.78062	4.97991	4.98004
1400	68.3477	68.3487	6.73833	6.73884	4.96598	4.96611
1410	68.7104	68.7113	6.69706	6.69756	4.9522	4.95232
1420	69.074	69.0749	6.65628	6.65678	4.93852	4.93865
1430	69.4385	69.4394	6.616	6.61648	4.925	4.92512
1440	69.8039	69.7966	6.5762	6.57668	4.91157	4.91197
1450	70.1701	70.146	6.53688	6.53736	4.8983	4.89922
1460	70.4964	70.4876	6.49804	6.4985	4.88644	4.88685
1470	70.8213	70.8213	6.45966	6.46012	4.87477	4.87489
1480	71.1466	71.147	6.42175	6.4222	4.86319	4.85922
1490	71.4723	71.4727	6.38429	6.38474	4.85174	4.84368
1500	71.7985	71.7989	6.34729	6.34773	4.81998	4.82825
1510	72.1251	72.1255	6.31073	6.31117	4.80875	4.81292
1520	72.4521	72.4525	6.27461	6.27505	4.79759	4.79769
1530	72.7795	72.7799	6.23894	6.23937	4.78655	4.78665
1540	73.1073	73.1079	6.20369	6.20413	4.7756	4.77571
1550	73.4355	73.447	6.16887	6.1702	4.76477	4.76474
1560	73.7648	73.7973	6.13452	6.13756	4.75402	4.75376
1570	74.148	74.1584	6.105	6.10617	4.74277	4.74276
1580	74.5307	74.5303	6.07574	6.076	4.73162	4.7353
1590	74.913	74.9125	6.04673	6.04699	4.72061	4.72785
1600	75.2948	75.2943	6.01798	6.01823	4.7275	4.71809
1610	75.676	75.6755	5.98947	5.98972	4.71673	4.70845
1620	76.0567	76.0561	5.96122	5.96146	4.69397	4.69892
1630	76.4368	76.4362	5.93321	5.93345	4.68343	4.68596
1640	76.8163	76.8157	5.90544	5.90568	4.67298	4.6731
1650	77.1952	77.1945	5.87791	5.87815	4.66267	4.66279
1660	77.5733	77.5726	5.85062	5.85086	4.65247	4.65258
1670	77.9508	77.9501	5.82357	5.82381	4.64239	4.6425
1680	78.3276	78.3269	5.79676	5.79699	4.63241	4.63251
1690	78.7036	78.6958	5.77017	5.7704	4.62254	4.62282
1700	79.0789	79.0438	5.74382	5.74405	4.61277	4.61375
1710	79.4181	79.3712	5.7177	5.71792	4.60402	4.60527
1720	79.6911	79.6782	5.6918	5.69203	4.597	4.59738
1730	79.9645	79.9649	5.66613	5.66635	4.59003	4.58734
1740	80.2384	80.2388	5.64068	5.6409	4.58308	4.57767
1750	80.5127	80.5132	5.61545	5.61567	4.56257	4.56804
1760	80.7875	80.788	5.59044	5.59066	4.55568	4.55844
1770	81.0628	81.0632	5.56565	5.56586	4.54884	4.54888
1780	81.3385	81.3389	5.54107	5.54128	4.54204	4.54207
1790	81.6146	81.6987	5.5167	5.51691	4.53527	4.53332
1800	81.8912	82.0746	5.49255	5.49276	4.52852	4.52425
1810	82.5863	82.467	5.4686	5.46881	4.51194	4.51486
1820	82.9422	82.8764	5.44486	5.44507	4.5035	4.50513
1830	83.3007	83.303	5.42133	5.42153	4.49506	4.49508
1840	83.6615	83.6637	5.398	5.3982	4.48665	4.48668
1850	84.0245	84.0266	5.37488	5.37508	4.47827	4.47829
1860	84.3896	84.3916	5.35195	5.35215	4.46991	4.46993
1870	84.7567	84.7585	5.32922	5.32942	4.46158	4.46161
1880	85.1256	85.1274	5.30669	5.30689	4.45327	4.45331
1890	85.4963	85.4979	5.28436	5.28455	4.44501	4.44504
1900	85.8686	85.8701	5.26222	5.26241	4.43676	4.43681
1910	86.2424	86.2438	5.24027	5.24046	4.42857	4.42861
1920	86.6176	86.6188	5.21851	5.2187	4.42041	4.42046
1930	86.9939	86.995	5.19694	5.19713	4.4123	4.41235
1940	87.3713	87.3723	5.17556	5.17574	4.40423	4.40429
1950	87.7497	87.7505	5.15436	5.15455	4.39623	4.39684
1960	88.1288	88.1295	5.13335	5.13353	4.38827	4.38945
1970	88.5086	88.5091	5.11252	5.1127	4.38318	4.38212
1980	88.8889	88.8893	5.09187	5.09205	4.37534	4.37483
1990	89.2695	89.2697	5.0714	5.07158	4.36755	4.36762
2000	89.6504	89.6504	5.05111	5.05128	4.35983	4.3599
2010	90.0313	90.0311	5.03099	5.03117	4.35219	4.35225
2020	90.412	90.4117	5.01105	5.01122	4.3446	4.34467
2030	90.7925	90.7921	4.99128	4.99146	4.33709	4.33716
2040	91.1726	91.172	4.97169	4.97186	4.32966	4.32972
2050	91.5521	91.5513	4.95226	4.95243	4.32228	4.32236
2060	91.9308	91.9299	4.93301	4.93318	4.31499	4.31508
2070	92.3086	92.3075	4.91392	4.91409	4.30779	4.30787
2080	92.6853	92.6841	4.895	4.89517	4.30066	4.30074
2090	93.0608	93.0591	4.87625	4.87641	4.29361	4.29371
2100	93.4348	93.4224	4.85765	4.85782	4.28665	4.28694
2110	93.8061	93.774	4.83923	4.83939	4.27981	4.28045
2120	94.1249	94.1142	4.82096	4.82112	4.27398	4.27421
2130	94.4434	94.4432	4.80285	4.80301	4.26818	4.26823
2140	94.7617	94.7616	4.7849	4.78506	4.26243	4.26247
2150	95.0799	95.0798	4.76711	4.76727	4.25673	4.25676
2160	95.398	95.398	4.74947	4.74963	4.25105	4.2511
2170	95.7161	95.7163	4.73199	4.73215	4.24543	4.24547
2180	96.0344	96.0346	4.71467	4.71482	4.23985	4.23989
2190	96.3529	96.3532	4.69749	4.69764	4.23431	4.23434
2200	96.6717	96.6722	4.68047	4.68062	4.2288	4.22883
2210	96.991	96.9915	4.66359	4.66374	4.22332	4.22335
2220	97.3107	97.3113	4.64687	4.64702	4.21787	4.2179
2230	97.6311	97.6318	4.63029	4.63044	4.21246	4.21248
2240	97.9522	97.953	4.61386	4.61401	4.20707	4.20709
2250	98.2741	98.275	4.59758	4.59772	4.2017	4.20173
2260	98.5969	98.598	4.58143	4.58158	4.19636	4.19123
2270	98.9208	98.922	4.56544	4.56558	4.19105	4.18075
2280	99.2459	99.2472	4.54958	4.54972	4.15995	4.17029
2290	99.5723	99.5737	4.53387	4.53401	4.15467	4.15984
2300	99.9	99.9015	4.51829	4.51843	4.1494	4.14942
2310	100.229	100.226	4.50285	4.50299	4.14415	4.14425
2320	100.56	100.538	4.48756	4.48769	4.13891	4.1393
2330	100.867	100.839	4.47239	4.47253	4.13411	4.13457
2340	101.134	101.129	4.45737	4.4575	4.12994	4.13005
2350	101.404	101.407	4.44248	4.44261	4.12576	4.12574
2360	101.677	101.68	4.42772	4.42785	4.12156	4.12155
2370	101.953	101.954	4.41309	4.41326	4.11736	4.11738
2380	102.231	102.237	4.3986	4.39925	4.11315	4.11319
2390	102.503	102.529	4.3844	4.3858	4.10908	4.109
2400	102.819	102.828	4.37242	4.37291	4.10482	4.10481
2410	103.136	103.135	4.3605	4.36056	4.1006	4.10062
2420	103.452	103.451	4.34864	4.3487	4.09639	4.09641
2430	103.767	103.767	4.33684	4.3369	4.0922	4.09222
2440	104.083	104.083	4.3251	4.32516	4.08803	4.08806
2450	104.399	104.399	4.31343	4.31349	4.08389	4.08327
2460	104.714	104.714	4.30181	4.30187	4.07976	4.07851
2470	105.03	105.03	4.29026	4.29032	4.07247	4.07377
2480	105.345	105.345	4.27876	4.27882	4.0684	4.06905
2490	105.66	105.66	4.26733	4.26739	4.06433	4.06435
2500	105.975	105.975	4.25595	4.25601	4.06029	4.06032
2510	106.29	106.29	4.24463	4.24469	4.05628	4.0563
2520	106.604	106.604	4.23338	4.23343	4.05229	4.05231
2530	106.919	106.919	4.22218	4.22224	4.04831	4.04833
2540	107.233	107.233	4.21104	4.21109	4.04436	4.04438
2550	107.547	107.547	4.19995	4.20001	4.04043	4.04045
2560	107.861	107.861	4.18893	4.18898	4.03653	4.03654
2570	108.175	108.174	4.17796	4.17802	4.03263	4.03265
2580	108.488	108.488	4.16705	4.1671	4.02876	4.02878
2590	108.801	108.801	4.15619	4.15625	4.02491	4.02493
2600	109.114	109.114	4.14539	4.14545	4.02108	4.02111
2610	109.427	109.427	4.13465	4.13471	4.01728	4.0173
2620	109.739	109.739	4.12396	4.12402	4.0135	4.01352
2630	110.051	110.051	4.11333	4.11339	4.00974	4.00976
2640	110.363	110.363	4.10276	4.10281	4.00599	4.00601
2650	110.675	110.675	4.09224	4.09229	4.00227	4.00229
2660	110.986	110.986	4.08177	4.08182	3.99857	3.99859
2670	111.298	111.297	4.07136	4.07141	3.99489	3.99491
2680	111.608	111.608	4.061	4.06105	3.99122	3.99125
2690	111.919	111.919	4.05069	4.05075	3.98759	3.98761
2700	112.229	112.229	4.04044	4.0405	3.98397	3.98399
2710	112.539	112.539	4.03025	4.0303	3.98037	3.98039
2720	112.849	112.848	4.0201	4.02015	3.97679	3.97681
2730	113.158	113.158	4.01001	4.01006	3.97323	3.97325
2740	113.467	113.467	3.99997	4.00002	3.96969	3.96972
2750	113.776	113.775	3.98998	3.99004	3.96619	3.9662
2760	114.084	114.083	3.98005	3.9801	3.9627	3.9627
2770	114.392	114.391	3.97016	3.97022	3.95921	3.95923
2780	114.699	114.699	3.96033	3.96038	3.95574	3.95373
2790	115.006	115.006	3.95055	3.9506	3.9523	3.94825
2800	115.313	115.313	3.94082	3.94087	3.93868	3.94279
2810	115.62	115.619	3.93114	3.93119	3.93529	3.93735
2820	115.926	115.925	3.92151	3.92156	3.93191	3.93193
2830	116.231	116.12	3.91193	3.90866	3.92854	3.92916
2840	116.537	116.281	3.9024	3.89859	3.92521	3.92744
2850	116.289	116.407	3.8763	3.89133	3.92486	3.92677
2860	116.423	116.499	3.88078	3.88687	3.92669	3.92714
2870	116.556	116.556	3.88522	3.88519	3.92855	3.92854
2880	116.689	116.688	3.88963	3.8896	3.93039	3.93039
2890	116.821	116.82	3.89402	3.89399	3.93223	3.93224
2900	116.951	116.951	3.89838	3.89835	3.93409	3.9341
2910	117.082	117.081	3.90272	3.90269	3.93595	3.93595
2920	117.211	117.203	3.90703	3.90678	3.93782	3.93785
2930	117.34	117.317	3.91132	3.91058	3.93968	3.93979
2940	117.433	117.424	3.91444	3.91412	3.94171	3.94176
2950	117.522	117.522	3.91741	3.91741	3.94377	3.94377
2960	117.612	117.614	3.92042	3.92048	3.94582	3.94581
2970	117.705	117.707	3.92349	3.92357	3.94786	3.94785
2980	117.799	117.803	3.92665	3.92675	3.94989	3.94987
2990	117.897	117.901	3.92991	3.93004	3.9519	3.95189
3000	117.999	118.004	3.93331	3.93347	3.9539	3.95388
3010	118.106	118.112	3.93687	3.93706	3.95588	3.95586
3020	118.218	118.225	3.94061	3.94083	3.95784	3.95781
3030	118.337	118.345	3.94458	3.94482	3.95976	3.95973
3040	118.464	118.467	3.94878	3.9489	3.96165	3.96164
3050	118.598	118.588	3.95327	3.95292	3.9635	3.96355
3060	118.717	118.705	3.95725	3.95685	3.96543	3.96549
3070	118.822	118.819	3.96074	3.96062	3.96743	3.96744
3080	118.926	118.926	3.96421	3.96418	3.96942	3.96942
3090	119.03	119.029	3.96765	3.96763	3.97141	3.97142
3100	119.132	119.132	3.97108	3.97106	3.97342	3.97342
3110	119.235	119.234	3.97448	3.97447	3.97542	3.97542
3120	119.336	119.336	3.97787	3.97786	3.97743	3.97743
3130	119.437	119.437	3.98125	3.98123	3.97944	3.97945
3140	119.538	119.538	3.9846	3.98459	3.98146	3.98146
3150	119.638	119.638	3.98794	3.98793	3.98348	3.98348
3160	119.738	119.738	3.99127	3.99125	3.98549	3.98549
3170	119.837	119.837	3.99458	3.99457	3.98751	3.98751
3180	119.936	119.936	3.99788	3.99787	3.98953	3.98954
3190	120.035	120.035	4.00117	4.00116	3.99156	3.99156
3200	120.134	120.133	4.00445	4.00445	3.9936	3.99359
3210	120.232	120.232	4.00773	4.00772	3.99563	3.99563
3220	120.33	120.33	4.01099	4.01098	3.99766	3.99766
3230	120.427	120.427	4.01425	4.01424	3.99969	3.99969
3240	120.525	120.525	4.0175	4.01749	4.00173	4.00173
3250	120.622	120.622	4.02075	4.02074	4.00376	4.00376
3260	120.72	120.72	4.02399	4.02399	4.0058	4.0058
3270	120.817	120.817	4.02723	4.02723	4.00783	4.00784
3280	120.914	120.914	4.03047	4.03047	4.00988	4.00988
3290	121.011	121.011	4.0337	4.0337	4.01192	4.01192
3300	121.108	121.108	4.03694	4.03694	4.01395	4.01396
3310	121.205	121.205	4.04018	4.04018	4.016	4.016
3320	121.303	121.303	4.04342	4.04342	4.01804	4.01804
3330	121.4	121.4	4.04666	4.04667	4.02008	4.02008
3340	121.497	121.497	4.04991	4.04991	4.02212	4.02212
3350	121.595	121.595	4.05316	4.05317	4.02415	4.02415
3360	121.693	121.693	4.05642	4.05643	4.02619	4.02619
3370	121.791	121.791	4.05969	4.05969	4.02823	4.02823
3380	121.889	121.889	4.06296	4.06297	4.03028	4.03027
3390	121.987	121.987	4.06624	4.06625	4.03231	4.03231
3400	122.086	122.086	4.06953	4.06954	4.03435	4.03435
3410	122.185	122.185	4.07283	4.07285	4.03639	4.03638
3420	122.284	122.285	4.07615	4.07616	4.03842	4.03842
3430	122.384	122.385	4.07947	4.07949	4.04046	4.04046
3440	122.484	122.485	4.08281	4.08283	4.0425	4.04249
3450	122.585	122.585	4.08617	4.08618	4.04453	4.04453
3460	122.686	122.687	4.08954	4.08955	4.04655	4.04656
3470	122.788	122.788	4.09292	4.09294	4.04859	4.04859
3480	122.89	122.89	4.09633	4.09634	4.05063	4.05062
3490	122.992	122.993	4.09975	4.09976	4.05265	4.05265
3500	123.096	123.096	4.10319	4.10321	4.05468	4.05467
3510	123.199	123.2	4.10665	4.10667	4.05669	4.05669
3520	123.304	123.304	4.11013	4.11015	4.05871	4.05872
3530	123.409	123.41	4.11363	4.11365	4.06074	4.06073
3540	123.515	123.515	4.11715	4.11718	4.06276	4.06275
3550	123.621	123.622	4.1207	4.12072	4.06477	4.06476
3560	123.728	123.729	4.12427	4.1243	4.06677	4.06677
3570	123.836	123.837	4.12787	4.1279	4.06878	4.06878
3580	123.945	123.946	4.13149	4.13152	4.07079	4.07079
3590	124.054	124.055	4.13515	4.13517	4.0728	4.07279
3600	124.165	124.166	4.13882	4.13885	4.0748	4.07479
3610	124.276	124.277	4.14253	4.14256	4.0768	4.07679
3620	124.388	124.389	4.14627	4.1463	4.07878	4.07879
3630	124.501	124.502	4.15003	4.15007	4.08078	4.08078
3640	124.615	124.616	4.15383	4.15386	4.08278	4.08277
3650	124.73	124.731	4.15766	4.1577	4.08476	4.08476
3660	124.846	124.847	4.16153	4.16156	4.08674	4.08674
3670	124.963	124.964	4.16542	4.16546	4.08871	4.08872
3680	125.081	125.082	4.16936	4.16939	4.09069	4.09069
3690	125.2	125.201	4.17332	4.17336	4.09267	4.09266
3700	125.32	125.321	4.17733	4.17736	4.09464	4.09463
3710	125.441	125.442	4.18137	4.1814	4.0966	4.0966
3720	125.563	125.564	4.18544	4.18548	4.09856	4.09856
3730	125.687	125.688	4.18956	4.1896	4.10052	4.10052
3740	125.812	125.813	4.19372	4.19376	4.10247	4.10247
3750	125.937	125.939	4.19791	4.19795	4.10442	4.10442
3760	126.065	126.066	4.20215	4.20219	4.10637	4.10636
3770	126.193	126.194	4.20643	4.20647	4.1083	4.1083
3780	126.323	126.324	4.21075	4.21079	4.11024	4.11024
3790	126.453	126.455	4.21512	4.21516	4.11217	4.11217
3800	126.586	126.587	4.21953	4.21957	4.1141	4.1141
3810	126.719	126.721	4.22398	4.22403	4.11603	4.11602
3820	126.854	126.857	4.22848	4.22855	4.11795	4.11794
3830	126.992	126.993	4.23307	4.23311	4.11986	4.11985
3840	127.131	127.131	4.2377	4.23771	4.12176	4.12176
3850	127.27	127.27	4.24233	4.24234	4.12367	4.12367
3860	127.409	127.409	4.24697	4.24697	4.12558	4.12558
3870	127.548	127.548	4.2516	4.25161	4.12748	4.12748
3880	127.687	127.687	4.25624	4.25624	4.12939	4.12939
3890	127.826	127.826	4.26088	4.26088	4.1313	4.1313
3900	127.966	127.966	4.26552	4.26552	4.13321	4.13321
3910	128.105	128.105	4.27016	4.27016	4.13511	4.13512
3920	128.244	128.244	4.2748	4.2748	4.13702	4.13703
3930	128.383	128.383	4.27944	4.27944	4.13894	4.13894
3940	128.523	128.523	4.28408	4.28408	4.14086	4.14086
3950	128.662	128.662	4.28872	4.28872	4.14277	4.14278
3960	128.801	128.801	4.29336	4.29336	4.1447	4.14469
3970	128.94	128.94	4.298	4.298	4.14661	4.14661
3980	129.079	129.079	4.30264	4.30264	4.14852	4.14853
3990	129.218	129.218	4.30727	4.30727	4.15044	4.15045
4000	129.357	129.357	4.31191	4.3119	4.15237	4.15237
4010	129.496	129.496	4.31654	4.31653	4.15429	4.15429
4020	129.635	129.635	4.32116	4.32116	4.15621	4.15621
4030	129.774	129.774	4.32579	4.32579	4.15813	4.15813
4040	129.912	129.912	4.33041	4.33041	4.16005	4.16006
4050	130.051	130.051	4.33503	4.33502	4.16198	4.16198
4060	130.189	130.189	4.33964	4.33963	4.16391	4.16392
4070	130.327	130.327	4.34425	4.34424	4.16585	4.16585
4080	130.466	130.465	4.34885	4.34885	4.16778	4.16778
4090	130.603	130.603	4.35345	4.35344	4.16971	4.16971
4100	130.741	130.741	4.35804	4.35804	4.17164	4.17165
4110	130.879	130.879	4.36263	4.36262	4.17358	4.17358
4120	131.016	131.016	4.36721	4.3672	4.17552	4.17552
4130	131.154	131.153	4.37179	4.37178	4.17746	4.17746
4140	131.291	131.29	4.37635	4.37635	4.17941	4.1794
4150	131.427	131.427	4.38091	4.38091	4.18134	4.18134
4160	131.564	131.564	4.38547	4.38546	4.18328	4.18329
4170	131.7	131.7	4.39001	4.39	4.18523	4.18523
4180	131.836	131.836	4.39455	4.39454	4.18719	4.18718
4190	131.972	131.972	4.39908	4.39907	4.18913	4.18913
4200	132.108	132.108	4.4036	4.40359	4.19108	4.19108
4210	132.243	132.243	4.40811	4.4081	4.19302	4.19303
4220	132.378	132.378	4.41261	4.4126	4.19498	4.19498
4230	132.513	132.513	4.4171	4.41709	4.19694	4.19694
4240	132.647	132.647	4.42158	4.42157	4.1989	4.1989
4250	132.781	132.781	4.42605	4.42604	4.20086	4.20086
4260	132.915	132.915	4.43051	4.4305	4.20283	4.20283
4270	133.049	133.048	4.43495	4.43494	4.20479	4.20479
4280	133.182	133.181	4.43939	4.43938	4.20676	4.20676
4290	133.314	133.314	4.44381	4.4438	4.20873	4.20873
4300	133.447	133.446	4.44822	4.44821	4.21069	4.2107
4310	133.579	133.578	4.45262	4.45261	4.21267	4.21267
4320	133.71	133.71	4.45701	4.45699	4.21465	4.21465
4330	133.841	133.841	4.46138	4.46136	4.21662	4.21662
4340	133.972	133.972	4.46574	4.46572	4.2186	4.2186
4350	134.102	134.102	4.47008	4.47006	4.22057	4.22058
4360	134.232	134.232	4.47441	4.47439	4.22255	4.22256
4370	134.362	134.361	4.47872	4.4787	4.22454	4.22454
4380	134.491	134.49	4.48302	4.483	4.22652	4.22653
4390	134.619	134.619	4.4873	4.48728	4.22852	4.22852
4400	134.747	134.746	4.49157	4.49155	4.23051	4.23084
4410	134.874	134.874	4.49582	4.4958	4.23252	4.23315
4420	135.001	135.001	4.50005	4.50003	4.23612	4.23547
4430	135.128	135.127	4.50426	4.50425	4.23811	4.23779
4440	135.254	135.253	4.50846	4.50844	4.24011	4.24012
4450	135.379	135.379	4.51264	4.51262	4.24212	4.24212
4460	135.504	135.503	4.5168	4.51678	4.24413	4.24413
4470	135.628	135.628	4.52094	4.52092	4.24614	4.24614
4480	135.752	135.751	4.52507	4.52505	4.24815	4.24815
4490	135.875	135.875	4.52917	4.52915	4.25016	4.25016
4500	135.998	135.997	4.53325	4.53323	4.25217	4.25218
4510	136.12	136.119	4.53732	4.5373	4.25419	4.2542
4520	136.241	136.24	4.54136	4.54134	4.25622	4.25622
4530	136.361	136.361	4.54538	4.54536	4.25825	4.25825
4540	136.481	136.481	4.54938	4.54936	4.26027	4.26028
4550	136.601	136.6	4.55336	4.55334	4.2623	4.26231
4560	136.719	136.719	4.55732	4.55729	4.26434	4.26434
4570	136.837	136.837	4.56125	4.56123	4.26637	4.26638
4580	136.955	136.954	4.56516	4.56514	4.26841	4.26842
4590	137.071	137.071	4.56905	4.56902	4.27045	4.27046
4600	137.187	137.187	4.57291	4.57288	4.27249	4.2725
4610	137.302	137.302	4.57675	4.57672	4.27455	4.27455
4620	137.417	137.42	4.58056	4.58068	4.2766	4.27659
4630	137.531	137.543	4.58435	4.58477	4.27865	4.27861
4640	137.664	137.67	4.58881	4.589	4.28064	4.28062
4650	137.801	137.802	4.59337	4.59338	4.28262	4.28262
4660	137.938	137.937	4.59792	4.59791	4.2846	4.2846
4670	138.074	138.074	4.60247	4.60246	4.28659	4.28659
4680	138.21	138.21	4.60701	4.607	4.28857	4.28857
4690	138.346	138.346	4.61153	4.61152	4.29055	4.29055
4700	138.482	138.481	4.61605	4.61604	4.29254	4.29254
4710	138.617	138.616	4.62056	4.62055	4.29452	4.29452
4720	138.752	138.751	4.62506	4.62505	4.29651	4.29651
4730	138.886	138.886	4.62954	4.62953	4.2985	4.2985
4740	139.021	139.02	4.63402	4.63401	4.3005	4.3005
4750	139.155	139.154	4.63849	4.63848	4.30249	4.30249
4760	139.288	139.288	4.64294	4.64293	4.30448	4.30448
4770	139.422	139.421	4.64739	4.64738	4.30648	4.30648
4780	139.555	139.554	4.65182	4.65181	4.30847	4.30848
4790	139.687	139.687	4.65624	4.65623	4.31047	4.31047
4800	139.82	139.819	4.66065	4.66064	4.31247	4.31248
4810	139.951	139.951	4.66505	4.66504	4.31448	4.31448
4820	140.083	140.083	4.66943	4.66942	4.31649	4.31649
4830	140.214	140.214	4.6738	4.67379	4.3185	4.3185
4840	140.345	140.344	4.67816	4.67815	4.32051	4.32051
4850	140.475	140.475	4.68251	4.68249	4.32252	4.32252
4860	140.605	140.605	4.68684	4.68682	4.32453	4.32454
4870	140.735	140.734	4.69116	4.69114	4.32655	4.32655
4880	140.864	140.863	4.69546	4.69545	4.32857	4.32857
4890	140.992	140.992	4.69975	4.69973	4.3306	4.33059
4900	141.121	141.12	4.70402	4.70401	4.33262	4.33262
4910	141.248	141.248	4.70828	4.70827	4.33464	4.33464
4920	141.376	141.375	4.71253	4.71251	4.33666	4.33666
4930	141.503	141.502	4.71676	4.71674	4.33869	4.33869
4940	141.629	141.629	4.72097	4.72095	4.34072	4.34072
4950	141.755	141.755	4.72517	4.72515	4.34275	4.34275
4960	141.88	141.88	4.72935	4.72933	4.34478	4.34478
4970	142.005	142.005	4.73351	4.7335	4.34681	4.34681
4980	142.13	142.129	4.73766	4.73765	4.34884	4.34885
4990	142.254	142.192	4.74179	4.73972	4.35088	4.34986
5000	142.377	142.254	4.74591	4.74179	4.35292	4.35088	3.92486	0.109063

## Sheet: Figure 4ab
Input Parameters
Parameter				Combinations
				Min	Max	Step
Depth (m):				1500	1500	10
Defined hydrostatic pressure (MPa):				-1	-1	1
Thickness (m):				5	100	1
Permeability (mD):				18	18	0.1
Porosity (fraction):				0.2	0.2	0.001
Geothermal gradient (°C):				25	25	0.1
Temperature (°C):				-1	-1	1
Area (km2):				256	256	100
Maximum injection pressure (as fraction):				0.8	0.8	0.8
Maximum well injection rate (MtCO2/yr):				1	1	1
Injection period (years):				30	30	1
Realizations:				-
Thickness	Uncapped					Capped
	Injection rate	Plume radius	Plume volume	Storage potential of plume	Storage potential of plume	Injection rate	Plume radius	Plume volume	Storage potential of plume
m	MtCO2/yr	km	Mm3	MtCO2/km2	MtCO2/km2	MtCO2/yr	km	Mm3	MtCO2/km2
5	0.13485	3.67348	5.73017	0.100736	0.0954263	0.13485	3.67348	5.73017	0.0954263
6	0.149895	3.67395	6.36945	0.106445	0.106046	0.149895	3.67395	6.36945	0.106046
7	0.166639	3.6744	7.08094	0.118093	0.117862	0.166639	3.6744	7.08094	0.117862
8	0.184369	3.67484	7.83436	0.130591	0.130371	0.184369	3.67484	7.83436	0.130371
9	0.203038	3.67527	8.62766	0.143746	0.143539	0.203038	3.67527	8.62766	0.143539
10	0.222594	3.67569	9.45865	0.157521	0.157328	0.222594	3.67569	9.45865	0.157328
11	0.242977	3.6761	10.3248	0.171874	0.171697	0.242977	3.6761	10.3248	0.171697
12	0.26412	3.67649	11.2232	0.186757	0.186598	0.26412	3.67649	11.2232	0.186598
13	0.285948	3.67687	12.1508	0.202118	0.201977	0.285948	3.67687	12.1508	0.201977
14	0.308383	3.67724	13.1041	0.217901	0.21778	0.308383	3.67724	13.1041	0.21778
15	0.331339	3.6776	14.0795	0.234047	0.233946	0.331339	3.6776	14.0795	0.233946
16	0.35473	3.67794	15.0735	0.250495	0.250415	0.35473	3.67794	15.0735	0.250415
17	0.378468	3.67827	16.0822	0.267183	0.267124	0.378468	3.67827	16.0822	0.267124
18	0.402464	3.67859	17.1018	0.284049	0.28401	0.402464	3.67859	17.1018	0.28401
19	0.426628	3.6789	18.1286	0.30103	0.301012	0.426628	3.6789	18.1286	0.301012
20	0.450875	3.6792	19.1589	0.318067	0.318069	0.450875	3.6792	19.1589	0.318069
21	0.47512	3.67948	20.1892	0.335101	0.335121	0.47512	3.67948	20.1892	0.335121
22	0.499284	3.67975	21.216	0.353388	0.352113	0.499284	3.67975	21.216	0.352113
23	0.528876	3.68001	22.4735	0.372351	0.37293	0.528876	3.68001	22.4735	0.37293
24	0.556007	3.68026	23.6263	0.392016	0.392009	0.556007	3.68026	23.6263	0.392009
25	0.58317	3.68049	24.7805	0.411095	0.411107	0.58317	3.68049	24.7805	0.411107
26	0.610284	3.68071	25.9327	0.43014	0.43017	0.610284	3.68071	25.9327	0.43017
27	0.637273	3.68092	27.0795	0.449095	0.449142	0.637273	3.68092	27.0795	0.449142
28	0.664063	3.68112	28.2179	0.46791	0.467974	0.664063	3.68112	28.2179	0.467974
29	0.690583	3.6813	29.3448	0.486535	0.486614	0.690583	3.6813	29.3448	0.486614
30	0.71677	3.68147	30.4576	0.504926	0.505019	0.71677	3.68147	30.4576	0.505019
31	0.742562	3.68163	31.5536	0.522431	0.523146	0.742562	3.68163	31.5536	0.523146
32	0.76531	3.68178	32.5202	0.538736	0.539129	0.76531	3.68178	32.5202	0.539129
33	0.786383	3.68192	33.4156	0.553784	0.553933	0.786383	3.68192	33.4156	0.553933
34	0.806818	3.68204	34.284	0.568141	0.56829	0.806818	3.68204	34.284	0.56829
35	0.826614	3.68215	35.1252	0.58205	0.582199	0.826614	3.68215	35.1252	0.582199
36	0.845774	3.68225	35.9393	0.595515	0.595661	0.845774	3.68225	35.9393	0.595661
37	0.864307	3.68233	36.7269	0.608543	0.608686	0.864307	3.68233	36.7269	0.608686
38	0.882229	3.68241	37.4884	0.621144	0.621282	0.882229	3.68241	37.4884	0.621282
39	0.899559	3.68247	38.2248	0.633333	0.633465	0.899559	3.68247	38.2248	0.633465
40	0.916321	3.68252	38.937	0.645126	0.645251	0.916321	3.68252	38.937	0.645251
41	0.932542	3.68256	39.6263	0.656543	0.656661	0.932542	3.68256	39.6263	0.656661
42	0.948254	3.68258	40.294	0.667606	0.667716	0.948254	3.68258	40.294	0.667716
43	0.96349	3.68259	40.9414	0.678338	0.67844	0.96349	3.68259	40.9414	0.67844
44	0.978287	3.68259	41.5702	0.688767	0.688859	0.978287	3.68259	41.5702	0.688859
45	0.992683	3.68258	42.1819	0.699013	0.699001	0.992683	3.68258	42.1819	0.699001
46	1.00672	3.68182	42.7783	0.709211	0.709177	1	3.68145	42.4928	0.704586
47	1.02043	3.68024	43.3611	0.7194	0.719455	1	3.66204	42.4928	0.712073
48	1.03387	3.67863	43.9322	0.729384	0.729567	1	3.6433	42.4928	0.71942
49	1.04653	3.67706	44.4699	0.738966	0.739131	1	3.62587	42.4928	0.726353
50	1.05848	3.67551	44.9776	0.748184	0.7482	1	3.6096	42.4928	0.732913
51	1.07031	3.67392	45.4804	0.757214	0.75722	1	3.59367	42.4928	0.739426
52	1.08207	3.67228	45.9802	0.766227	0.766222	1	3.57801	42.4928	0.745912
53	1.0938	3.6706	46.4787	0.775253	0.775238	1	3.56256	42.4928	0.752397
54	1.10554	3.66887	46.9776	0.784325	0.784299	1	3.54726	42.4928	0.758901
55	1.11733	3.66708	47.4786	0.793472	0.793436	1	3.53206	42.4928	0.765447
56	1.12921	3.66524	47.9833	0.802725	0.80268	1	3.51691	42.4928	0.772057
57	1.14122	3.66333	48.4935	0.812115	0.81206	1	3.50176	42.4928	0.778751
58	1.15338	3.66135	49.0106	0.821671	0.821606	1	3.48657	42.4928	0.785551
59	1.16575	3.6593	49.5361	0.831423	0.831349	1	3.4713	42.4928	0.792477
60	1.17836	3.65716	50.0717	0.8414	0.841316	1	3.45592	42.4928	0.799548
61	1.19123	3.65495	50.6186	0.851629	0.851535	1	3.44039	42.4928	0.806783
62	1.2044	3.65265	51.1783	0.862137	0.862035	1	3.42468	42.4928	0.814201
63	1.2179	3.65026	51.752	0.872953	0.872842	1	3.40877	42.4928	0.821818
64	1.23176	3.64777	52.341	0.8841	0.883981	1	3.39264	42.4928	0.829653
65	1.24601	3.64518	52.9464	0.895605	0.895478	1	3.37626	42.4928	0.83772
66	1.26067	3.64248	53.5694	0.907491	0.907357	1	3.35963	42.4928	0.846035
67	1.27577	3.63968	54.211	0.919782	0.91964	1	3.34273	42.4928	0.854612
68	1.29133	3.63676	54.872	0.932499	0.93235	1	3.32555	42.4928	0.863465
69	1.30736	3.63372	55.5534	0.945662	0.945506	1	3.30809	42.4928	0.872605
70	1.32389	3.63056	56.2559	0.95929	0.959129	1	3.29034	42.4928	0.882044
71	1.34093	3.62728	56.9801	0.973402	0.973235	1	3.27231	42.4928	0.891792
72	1.3585	3.62386	57.7265	0.988012	0.987841	1	3.254	42.4928	0.901857
73	1.3766	3.62033	58.4955	1.00313	1.00296	1	3.23541	42.4928	0.912246
74	1.39523	3.61665	59.2875	1.01878	1.0186	1	3.21657	42.4928	0.922965
75	1.41441	3.61285	60.1024	1.03496	1.03478	1	3.19748	42.4928	0.934017
76	1.43413	3.60892	60.9403	1.05168	1.0515	1	3.17817	42.4928	0.945405
77	1.45439	3.60485	61.801	1.06894	1.06875	1	3.15865	42.4928	0.957127
78	1.47517	3.60065	62.684	1.08674	1.08656	1	3.13894	42.4928	0.969181
79	1.49646	3.59631	63.5888	1.1046	1.1049	1	3.11908	42.4928	0.981562
80	1.5188	3.59479	64.5381	1.12235	1.12234	1	3.10123	42.4928	0.992898
81	1.54161	3.59384	65.5075	1.13989	1.1398	1	3.08386	42.4928	1.00411
82	1.56474	3.59288	66.4902	1.15759	1.15752	1	3.0666	42.4928	1.01544
83	1.58813	3.59193	67.4841	1.1755	1.17544	1	3.04951	42.4928	1.02686
84	1.61172	3.59097	68.4867	1.19358	1.19354	1	3.0326	42.4928	1.03834
85	1.63546	3.59002	69.4954	1.21179	1.21177	1	3.01593	42.4928	1.04985
86	1.65927	3.58906	70.507	1.23006	1.23006	1	2.99953	42.4928	1.06137
87	1.68306	3.58811	71.5181	1.24834	1.24836	1	2.98345	42.4928	1.07284
88	1.70675	3.58716	72.5248	1.26656	1.26661	1	2.96773	42.4928	1.08423
89	1.73024	3.5862	73.523	1.28465	1.28472	1	2.95242	42.4928	1.09551
90	1.75342	3.58525	74.508	1.30253	1.30263	1	2.93757	42.4928	1.10661
91	1.77618	3.5843	75.4747	1.3201	1.32023	1	2.92323	42.4928	1.11749
92	1.79837	3.58335	76.4178	1.33727	1.33744	1	2.90946	42.4928	1.1281
93	1.81987	3.58239	77.3315	1.35394	1.35415	1	2.89631	42.4928	1.13837
94	1.84053	3.58144	78.2095	1.37001	1.37025	1	2.88383	42.4928	1.14824
95	1.8602	3.58049	79.0452	1.38534	1.38563	1	2.87209	42.4928	1.15765
96	1.87871	3.57954	79.8316	1.39983	1.40016	1	2.86114	42.4928	1.16652
97	1.89588	3.57859	80.5613	1.41334	1.41371	1	2.85105	42.4928	1.17479
98	1.91154	3.57764	81.2269	1.42573	1.42614	1	2.84189	42.4928	1.18238
99	1.92551	3.57668	81.8203	1.43686	1.43733	1	2.83372	42.4928	1.18921
100	1.93759	3.57573	82.3335	1.44222	1.44711	1	2.82662	42.4928	1.19519

## Sheet: Figure 4cd
Input Parameters
Parameter				Combinations
				Min	Max	Step
Depth (m):				1500	1500	10
Defined hydrostatic pressure (MPa):				-1	-1	1
Thickness (m):				5	100	1
Permeability (mD):				18	18	0.1
Porosity (fraction):				0.2	0.2	0.001
Geothermal gradient (°C):				25	25	0.1
Temperature (°C):				-1	-1	1
Area (km2):				256	256	100
Maximum injection pressure (as fraction):				0.8	0.8	0.8
Maximum well injection rate (MtCO2/yr):				1	1	1
Injection period (years):				30	30	1
Realizations:				-
Thickness	Reservoir capacity	Reservoir capacity	Number of wells	Number of wells	Cost	Cost
m	MtCO2	MtCO2	#	#	$/tCO2	$/tCO2
5	19.1769	21.3911	4.74029	4.73909	11.186	10.8338
6	21.3109	22.5932	4.73908	4.73851	10.4815	10.5048
7	23.6856	23.8437	4.73791	4.73794	9.84672	9.89914
8	26.1994	26.3316	4.73677	4.7368	9.22696	9.33081
9	28.8456	28.9703	4.73566	4.73569	8.75445	8.82462
10	31.6167	31.7329	4.73458	4.73461	8.3444	8.38292
11	34.5043	34.6109	4.73354	4.73357	7.95057	8.01037
12	37.4986	37.5948	4.73252	4.73256	7.63823	7.68405
13	40.5893	40.6742	4.73154	4.73157	7.36417	7.39473
14	43.765	43.838	4.73059	4.73062	7.12289	7.14641
15	47.0138	47.0745	4.72967	4.72971	6.89778	6.92293
16	50.3233	50.3716	4.72879	4.72882	6.70898	6.72436
17	53.6812	53.7169	4.72793	4.72797	6.52082	6.54734
18	57.0747	57.0979	4.72711	4.72714	6.37133	6.39141
19	60.4914	60.5025	4.72632	4.72635	6.23778	6.2477
20	63.9191	63.9184	4.72556	4.72559	6.11815	6.12228
21	67.3459	67.4922	4.72484	4.72487	5.99042	6.00546
22	70.7607	71.1496	4.72414	4.72417	5.89374	5.9003
23	74.9441	74.889	4.72348	4.72351	5.78722	5.80371
24	78.7781	78.7092	4.72285	4.72288	5.71197	5.71818
25	82.6161	82.609	4.72225	4.72228	5.63518	5.6388
26	86.4469	86.429	4.72168	4.72171	5.5628	5.5687
27	90.2597	90.2313	4.72114	4.72117	5.49686	5.50266
28	94.044	94.0058	4.72064	4.72067	5.43671	5.44192
29	97.79	97.7427	4.72016	4.72019	5.38176	5.38316
30	101.489	101.359	4.71972	4.71975	5.3315	5.32998
31	105.131	104.814	4.71931	4.71934	5.26895	5.27969
32	108.343	108.097	4.71893	4.71896	5.23097	5.23428
33	111.318	111.199	4.71859	4.71862	5.18526	5.1933
34	114.204	114.114	4.71827	4.7183	5.15472	5.15963
35	116.999	116.909	4.71799	4.71802	5.12659	5.12876
36	119.704	119.616	4.71773	4.71777	5.10062	5.10258
37	122.321	122.236	4.71751	4.71755	5.0766	5.07837
38	124.853	124.77	4.71733	4.71736	5.05435	5.05594
39	127.301	127.222	4.71717	4.7172	5.03368	5.03511
40	129.67	129.594	4.71704	4.71708	5.01443	5.01572
41	131.963	131.891	4.71695	4.71698	4.99648	4.99829
42	134.184	134.118	4.71689	4.71692	4.97967	4.97965
43	136.339	136.278	4.71686	4.71689	4.96721	4.96206
44	138.433	138.204	4.71686	4.71746	4.94047	4.94664
45	140.471	139.987	4.71689	4.72807	4.92647	4.93368
46	141.594	141.634	4.71979	4.74853	4.91936	4.92237
47	143.098	143.141	4.76994	4.77827	4.91491	4.91562
48	144.575	144.504	4.81915	4.8168	4.91064	4.91094
49	145.968	145.904	4.8656	4.86348	4.90671	4.90698
50	147.286	147.264	4.90954	4.90882	4.90308	4.90321
51	148.595	148.59	4.95317	4.953	4.89955	4.89963
52	149.899	149.898	4.99662	4.9966	4.89609	4.89616
53	151.202	151.206	5.04005	5.04019	4.89271	4.89276
54	152.509	152.517	5.08362	5.0839	4.88937	4.88941
55	153.824	153.837	5.12747	5.1279	4.88607	4.8861
56	155.152	155.17	5.17175	5.17232	4.8828	4.88282
57	156.498	156.519	5.21659	5.2173	4.87955	4.87955
58	157.864	157.89	5.26215	5.26299	4.8763	4.8763
59	159.256	159.285	5.30854	5.30951	4.87305	4.87304
60	160.677	160.71	5.35591	5.35701	4.86978	4.86977
61	162.131	162.168	5.40437	5.40559	4.8665	4.86732
62	163.622	163.662	5.45406	5.4554	4.8632	4.86485
63	165.153	165.196	5.50509	5.50654	4.86406	4.86235
64	166.727	166.774	5.55757	5.55913	4.8607	4.85982
65	168.348	168.398	5.61161	5.61327	4.85729	4.85725
66	170.019	170.072	5.66731	5.66906	4.85385	4.85381
67	171.743	171.798	5.72476	5.7266	4.85036	4.85032
68	173.522	173.58	5.78406	5.78599	4.84684	4.84679
69	175.359	175.419	5.84529	5.84729	4.84327	4.84323
70	177.256	177.318	5.90852	5.91058	4.83966	4.83961
71	179.214	179.278	5.97382	5.97594	4.836	4.83596
72	181.237	181.302	6.04124	6.04341	4.83231	4.83228
73	183.325	183.391	6.11083	6.11304	4.82858	4.82855
74	185.479	185.546	6.18263	6.18487	4.82482	4.8248
75	187.7	187.767	6.25667	6.25891	4.82104	4.82101
76	189.989	190.056	6.33295	6.33519	4.81723	4.81721
77	192.344	192.411	6.41148	6.4137	4.81339	4.81344
78	194.767	194.777	6.49222	6.49258	4.80955	4.80975
79	197.255	197.137	6.57516	6.57124	4.806	4.80617
80	199.533	199.481	6.6511	6.64937	4.80259	4.8027
81	201.787	201.799	6.72623	6.72664	4.7993	4.79936
82	204.064	204.081	6.80212	6.80271	4.79605	4.7961
83	206.358	206.371	6.87861	6.87902	4.79286	4.79291
84	208.665	208.672	6.95551	6.95572	4.78972	4.78978
85	210.979	210.978	7.03263	7.03261	4.78664	4.78672
86	213.292	213.284	7.10974	7.10948	4.78364	4.78372
87	215.598	215.582	7.18659	7.18606	4.78072	4.78081
88	217.888	217.863	7.26292	7.2621	4.77789	4.77799
89	220.153	220.119	7.33843	7.33729	4.77516	4.77526
90	222.384	222.34	7.41281	7.41132	4.77252	4.77296
91	224.571	224.515	7.4857	7.48385	4.77001	4.77077
92	226.702	226.635	7.55674	7.55449	4.76921	4.76871
93	228.766	228.686	7.62554	7.62287	4.76695	4.76677
94	230.75	230.657	7.69167	7.68856	4.76483	4.76498
95	232.641	232.534	7.7547	7.75112	4.76286	4.76302
96	234.425	234.303	7.81415	7.81009	4.76104	4.76121
97	236.086	235.949	7.86954	7.86497	4.7594	4.75958
98	237.611	237.458	7.92036	7.91526	4.75794	4.75813
99	238.983	238.216	7.96609	7.94054	4.75667	4.7574
100	240.185	238.926	8.00618	7.96421	4.7556	4.75674

## Sheet: Figure 6ab
Input Parameters
Parameter				Combinations
				Min	Max	Step
Depth (m):				1500	1500	10
Defined hydrostatic pressure (MPa):				-1	-1	1
Thickness (m):				10	10	1
Permeability (mD):				1	150	1
Porosity (fraction):				0.2	0.2	0.005
Geothermal gradient (°C):				25	25	0.1
Temperature (°C):				-1	-1	1
Area (km2):				256	256	100
Maximum injection pressure (as fraction):				0.8	0.8	0.8
Maximum well injection rate (MtCO2/yr):				1	1	1
Injection period (years):				30	30	1
Realizations:				-
Permeability	Uncapped					Capped
	Injection rate	Plume radius	Plume volume	Storage potential of plume	Storage potential of plume	Injection rate	Plume radius	Plume volume	Storage potential of plume
mD	MtCO2/yr	km	Mm3	MtCO2/km2	MtCO2/km2	MtCO2/yr	km	Mm3	MtCO2/km2
1	0.0147241	1.09686	0.625669	0.122365	0.116869	0.0147241	1.09686	0.625669	0.116869
2	0.0281529	1.45003	1.1963	0.126438	0.127861	0.0281529	1.45003	1.1963	0.127861
3	0.0412088	1.70995	1.75108	0.133771	0.134584	0.0412088	1.70995	1.75108	0.134584
4	0.0539942	1.9269	2.29436	0.138291	0.138867	0.0539942	1.9269	2.29436	0.138867
5	0.0662319	2.11477	2.81438	0.141476	0.141421	0.0662319	2.11477	2.81438	0.141421
6	0.0786285	2.28235	3.34115	0.144231	0.144141	0.0786285	2.28235	3.34115	0.144141
7	0.0913382	2.43479	3.88122	0.146989	0.14713	0.0913382	2.43479	3.88122	0.14713
8	0.103972	2.57537	4.41806	0.149186	0.149696	0.103972	2.57537	4.41806	0.149696
9	0.115611	2.70636	4.91266	0.150669	0.150731	0.115611	2.70636	4.91266	0.150731
10	0.127076	2.82939	5.39982	0.151534	0.151582	0.127076	2.82939	5.39982	0.151582
11	0.13838	2.94569	5.88017	0.152323	0.15229	0.13838	2.94569	5.88017	0.15229
12	0.149537	3.07485	6.35425	0.153097	0.153097	0.149537	3.07485	6.35425	0.151033
13	0.161727	3.16775	6.87222	0.153899	0.153905	0.161727	3.16775	6.87222	0.153905
14	0.173949	3.27687	7.39158	0.154676	0.154695	0.173949	3.27687	7.39158	0.154695
15	0.18615	3.38184	7.91005	0.155407	0.155428	0.18615	3.38184	7.91005	0.155428
16	0.198314	3.48307	8.42692	0.156086	0.156099	0.198314	3.48307	8.42692	0.156099
17	0.210462	3.58092	8.94311	0.15672	0.156731	0.210462	3.58092	8.94311	0.156731
18	0.222594	3.67569	9.45865	0.157318	0.157328	0.222594	3.67569	9.45865	0.157328
19	0.234712	3.76765	9.97359	0.157885	0.157895	0.234712	3.76765	9.97359	0.157895
20	0.246817	3.85701	10.4879	0.158424	0.158433	0.246817	3.85701	10.4879	0.158433
21	0.258909	3.94398	11.0018	0.158938	0.158946	0.258909	3.94398	11.0018	0.158946
22	0.270988	4.02872	11.515	0.159429	0.159436	0.270988	4.02872	11.515	0.159436
23	0.283055	4.1114	12.0278	0.159899	0.159905	0.283055	4.1114	12.0278	0.159905
24	0.295112	4.19215	12.5401	0.160349	0.160355	0.295112	4.19215	12.5401	0.160355
25	0.307157	4.2711	13.052	0.160782	0.160788	0.307157	4.2711	13.052	0.160788
26	0.319192	4.34834	13.5634	0.161199	0.161204	0.319192	4.34834	13.5634	0.161204
27	0.331216	4.42399	14.0743	0.1616	0.161605	0.331216	4.42399	14.0743	0.161605
28	0.343231	4.49814	14.5849	0.161987	0.161992	0.343231	4.49814	14.5849	0.161992
29	0.355237	4.57085	15.095	0.162362	0.162366	0.355237	4.57085	15.095	0.162366
30	0.367233	4.64222	15.6048	0.162724	0.162727	0.367233	4.64222	15.6048	0.162727
31	0.37922	4.71231	16.1141	0.163074	0.163078	0.37922	4.71231	16.1141	0.163078
32	0.391199	4.78118	16.6232	0.163414	0.163418	0.391199	4.78118	16.6232	0.163418
33	0.40317	4.8489	17.1318	0.163744	0.163747	0.40317	4.8489	17.1318	0.163747
34	0.415133	4.9155	17.6402	0.164064	0.164067	0.415133	4.9155	17.6402	0.164067
35	0.427087	4.98106	18.1481	0.164376	0.164379	0.427087	4.98106	18.1481	0.164379
36	0.439034	5.0456	18.6558	0.164679	0.164681	0.439034	5.0456	18.6558	0.164681
37	0.450974	5.10917	19.1632	0.164974	0.164976	0.450974	5.10917	19.1632	0.164976
38	0.462906	5.17182	19.6702	0.165261	0.165264	0.462906	5.17182	19.6702	0.165264
39	0.474832	5.23358	20.1769	0.165541	0.165544	0.474832	5.23358	20.1769	0.165544
40	0.48675	5.29449	20.6834	0.165815	0.165817	0.48675	5.29449	20.6834	0.165817
41	0.498662	5.35458	21.1896	0.166236	0.166084	0.498662	5.35458	21.1896	0.166084
42	0.51199	5.41387	21.7559	0.166726	0.166808	0.51199	5.41387	21.7559	0.166808
43	0.524618	5.4724	22.2925	0.167283	0.167285	0.524618	5.4724	22.2925	0.167285
44	0.537262	5.5302	22.8298	0.167752	0.167755	0.537262	5.5302	22.8298	0.167755
45	0.549921	5.58729	23.3677	0.168214	0.168217	0.549921	5.58729	23.3677	0.168217
46	0.562596	5.6437	23.9063	0.168669	0.168671	0.562596	5.6437	23.9063	0.168671
47	0.575287	5.69944	24.4456	0.169116	0.169119	0.575287	5.69944	24.4456	0.169119
48	0.587993	5.75454	24.9855	0.169557	0.169559	0.587993	5.75454	24.9855	0.169559
49	0.600714	5.80903	25.526	0.169991	0.169994	0.600714	5.80903	25.526	0.169994
50	0.61345	5.86291	26.0672	0.170419	0.170421	0.61345	5.86291	26.0672	0.170421
51	0.626201	5.91621	26.609	0.170842	0.170843	0.626201	5.91621	26.609	0.170843
52	0.638967	5.96894	27.1515	0.171258	0.17126	0.638967	5.96894	27.1515	0.17126
53	0.651748	6.02113	27.6946	0.171668	0.17167	0.651748	6.02113	27.6946	0.17167
54	0.664544	6.07279	28.2383	0.172074	0.172075	0.664544	6.07279	28.2383	0.172075
55	0.677354	6.12393	28.7827	0.172474	0.172475	0.677354	6.12393	28.7827	0.172475
56	0.690179	6.17456	29.3277	0.172869	0.17287	0.690179	6.17456	29.3277	0.17287
57	0.703018	6.22471	29.8732	0.173259	0.173261	0.703018	6.22471	29.8732	0.173261
58	0.715872	6.27438	30.4194	0.173645	0.173646	0.715872	6.27438	30.4194	0.173646
59	0.72874	6.32359	30.9662	0.173983	0.174027	0.72874	6.32359	30.9662	0.174027
60	0.741622	6.37467	31.5136	0.174233	0.174277	0.741622	6.37467	31.5136	0.174277
61	0.754207	6.42634	32.0484	0.174351	0.174395	0.754207	6.42634	32.0484	0.174395
62	0.766214	6.47758	32.5586	0.17438	0.17438	0.766214	6.47758	32.5586	0.17438
63	0.778216	6.5284	33.0686	0.174365	0.174365	0.778216	6.5284	33.0686	0.174365
64	0.790212	6.5788	33.5783	0.17435	0.17435	0.790212	6.5788	33.5783	0.17435
65	0.802203	6.62881	34.0879	0.174335	0.174335	0.802203	6.62881	34.0879	0.174335
66	0.814188	6.67842	34.5972	0.174321	0.174321	0.814188	6.67842	34.5972	0.174321
67	0.826169	6.72765	35.1062	0.174306	0.174306	0.826169	6.72765	35.1062	0.174306
68	0.838144	6.77651	35.6151	0.174292	0.174292	0.838144	6.77651	35.6151	0.174292
69	0.850114	6.82499	36.1237	0.174279	0.174279	0.850114	6.82499	36.1237	0.174279
70	0.862079	6.87313	36.6322	0.174265	0.174265	0.862079	6.87313	36.6322	0.174265
71	0.87404	6.92091	37.1404	0.174252	0.174252	0.87404	6.92091	37.1404	0.174252
72	0.885995	6.96834	37.6484	0.174238	0.174238	0.885995	6.96834	37.6484	0.174238
73	0.897946	7.01544	38.1562	0.174225	0.174225	0.897946	7.01544	38.1562	0.174225
74	0.909892	7.06222	38.6639	0.174212	0.174212	0.909892	7.06222	38.6639	0.174212
75	0.921833	7.10867	39.1713	0.1742	0.1742	0.921833	7.10867	39.1713	0.1742
76	0.93377	7.1548	39.6785	0.174187	0.174187	0.93377	7.1548	39.6785	0.174187
77	0.945702	7.20063	40.1856	0.174175	0.174175	0.945702	7.20063	40.1856	0.174175
78	0.95763	7.24615	40.6924	0.174163	0.174163	0.95763	7.24615	40.6924	0.174163
79	0.969554	7.29137	41.1991	0.174151	0.174151	0.969554	7.29137	41.1991	0.174151
80	0.981473	7.3363	41.7056	0.174139	0.174139	0.981473	7.3363	41.7056	0.174139
81	0.993388	7.38095	42.2119	0.174138	0.174127	0.993388	7.38095	42.2119	0.174127
82	1.00552	7.42543	42.7274	0.174147	0.174148	1	7.42786	42.4928	0.173079
83	1.01768	7.46981	43.244	0.174167	0.174166	1	7.44009	42.4928	0.17251
84	1.02987	7.51398	43.7623	0.174188	0.174187	1	7.45215	42.4928	0.171952
85	1.04211	7.55794	44.2822	0.174213	0.174212	1	7.46405	42.4928	0.171405
86	1.05438	7.6017	44.8038	0.174241	0.17424	1	7.47578	42.4928	0.170867
87	1.0667	7.64528	45.327	0.174273	0.174272	1	7.48737	42.4928	0.170339
88	1.07905	7.68867	45.8521	0.174307	0.174306	1	7.4988	42.4928	0.169819
89	1.09145	7.73189	46.3789	0.174344	0.174343	1	7.5101	42.4928	0.169309
90	1.10389	7.77494	46.9075	0.174383	0.174383	1	7.52127	42.4928	0.168807
91	1.11637	7.81784	47.4379	0.174425	0.174425	1	7.5323	42.4928	0.168312
92	1.1289	7.86058	47.9702	0.174469	0.174469	1	7.54322	42.4928	0.167826
93	1.14147	7.90318	48.5043	0.174516	0.174515	1	7.55401	42.4928	0.167346
94	1.15409	7.94564	49.0404	0.174563	0.174563	1	7.5647	42.4928	0.166874
95	1.16675	7.98797	49.5784	0.174613	0.174613	1	7.57528	42.4928	0.166408
96	1.17945	8.03017	50.1183	0.174664	0.174664	1	7.58575	42.4928	0.165949
97	1.19221	8.07226	50.6602	0.174716	0.174716	1	7.59613	42.4928	0.165495
98	1.20501	8.11424	51.2042	0.17477	0.17477	1	7.60642	42.4928	0.165048
99	1.21786	8.15611	51.7501	0.174824	0.174824	1	7.61663	42.4928	0.164606
100	1.23075	8.19788	52.2982	0.17488	0.174879	1	7.62675	42.4928	0.16417
101	1.2437	8.23956	52.8483	0.174936	0.174936	1	7.63679	42.4928	0.163738
102	1.25669	8.28116	53.4005	0.174992	0.174992	1	7.64676	42.4928	0.163311
103	1.26974	8.32267	53.9548	0.175049	0.175049	1	7.65666	42.4928	0.162889
104	1.28284	8.36411	54.5113	0.175107	0.175107	1	7.6665	42.4928	0.162471
105	1.29598	8.40548	55.07	0.175164	0.175164	1	7.67628	42.4928	0.162058
106	1.30918	8.44679	55.6308	0.175222	0.175222	1	7.686	42.4928	0.161648
107	1.32243	8.48804	56.1939	0.175278	0.175279	1	7.69567	42.4928	0.161242
108	1.33574	8.52931	56.7593	0.175332	0.175334	1	7.70535	42.4928	0.160837
109	1.34909	8.57062	57.3268	0.175384	0.175384	1	7.71507	42.4928	0.160432
110	1.36251	8.6119	57.8967	0.175433	0.175433	1	7.72476	42.4928	0.16003
111	1.37597	8.65316	58.4689	0.175481	0.175482	1	7.73442	42.4928	0.159631
112	1.38949	8.6944	59.0434	0.175528	0.175529	1	7.74405	42.4928	0.159234
113	1.40307	8.73562	59.6203	0.175574	0.175575	1	7.75367	42.4928	0.158839
114	1.4167	8.77684	60.1995	0.175619	0.17562	1	7.76327	42.4928	0.158446
115	1.43039	8.81805	60.7812	0.175662	0.175663	1	7.77285	42.4928	0.158056
116	1.44413	8.85926	61.3652	0.175704	0.175705	1	7.78242	42.4928	0.157667
117	1.45793	8.90048	61.9517	0.175744	0.175745	1	7.79198	42.4928	0.157281
118	1.47179	8.94171	62.5406	0.175782	0.175783	1	7.80154	42.4928	0.156896
119	1.48571	8.98295	63.132	0.175819	0.17582	1	7.8111	42.4928	0.156512
120	1.49969	9.02422	63.7259	0.175839	0.175854	1	7.82065	42.4928	0.15613
121	1.51257	9.06321	64.2736	0.175842	0.175842	1	7.83036	42.4928	0.155743
122	1.52544	9.10203	64.8203	0.175829	0.175829	1	7.84003	42.4928	0.155359
123	1.53831	9.14072	65.3672	0.175814	0.175814	1	7.84965	42.4928	0.154978
124	1.55118	9.17929	65.9141	0.175799	0.175799	1	7.85923	42.4928	0.154601
125	1.56406	9.21773	66.4613	0.175782	0.175783	1	7.86877	42.4928	0.154226
126	1.57694	9.25605	67.0085	0.175765	0.175766	1	7.87826	42.4928	0.153855
127	1.58982	9.29426	67.5559	0.175747	0.175748	1	7.88771	42.4928	0.153486
128	1.6027	9.33234	68.1034	0.175729	0.175729	1	7.89712	42.4928	0.153121
129	1.61559	9.3703	68.651	0.175709	0.17571	1	7.90649	42.4928	0.152758
130	1.62848	9.40815	69.1987	0.175689	0.175689	1	7.91581	42.4928	0.152398
131	1.64137	9.44588	69.7466	0.175668	0.175668	1	7.9251	42.4928	0.152041
132	1.65427	9.4835	70.2946	0.175646	0.175647	1	7.93434	42.4928	0.151687
133	1.66717	9.52101	70.8427	0.175624	0.175624	1	7.94355	42.4928	0.151336
134	1.68007	9.55841	71.3909	0.175601	0.175601	1	7.95272	42.4928	0.150987
135	1.69297	9.59569	71.9392	0.175577	0.175578	1	7.96185	42.4928	0.150641
136	1.70588	9.63287	72.4877	0.175553	0.175553	1	7.97094	42.4928	0.150298
137	1.71879	9.66994	73.0363	0.175528	0.175528	1	7.97999	42.4928	0.149957
138	1.7317	9.70691	73.585	0.175502	0.175503	1	7.989	42.4928	0.149619
139	1.74462	9.74376	74.1338	0.175476	0.175476	1	7.99798	42.4928	0.149283
140	1.75754	9.78052	74.6827	0.175449	0.175449	1	8.00692	42.4928	0.14895
141	1.77046	9.81717	75.2318	0.175422	0.175422	1	8.01583	42.4928	0.148619
142	1.78338	9.85372	75.7809	0.175394	0.175394	1	8.0247	42.4928	0.148291
143	1.79631	9.89017	76.3302	0.175365	0.175366	1	8.03353	42.4928	0.147965
144	1.80924	9.92652	76.8796	0.175336	0.175337	1	8.04233	42.4928	0.147641
145	1.82217	9.96277	77.4291	0.175307	0.175307	1	8.0511	42.4928	0.14732
146	1.8351	9.99893	77.9787	0.175277	0.175277	1	8.05983	42.4928	0.147001
147	1.84804	10.035	78.5284	0.175246	0.175246	1	8.06852	42.4928	0.146684
148	1.86098	10.0709	79.0782	0.175215	0.175215	1	8.07719	42.4928	0.14637
149	1.87392	10.1068	79.6281	0.175184	0.175184	1	8.08581	42.4928	0.146057
150	1.88686	10.1426	80.1782	0.175168	0.175152	1	8.09441	42.4928	0.145747

## Sheet: Figure 6cd
Input Parameters
Parameter				Combinations
				Min	Max	Step
Depth (m):				1500	1500	10
Defined hydrostatic pressure (MPa):				-1	-1	1
Thickness (m):				10	10	1
Permeability (mD):				1	150	1
Porosity (fraction):				0.2	0.2	0.005
Geothermal gradient (°C):				25	25	0.1
Temperature (°C):				-1	-1	1
Area (km2):				256	256	100
Maximum injection pressure (as fraction):				0.8	0.8	0.8
Maximum well injection rate (MtCO2/yr):				1	1	1
Injection period (years):				30	30	1
Realizations:				-
Permeabbility	Reservoir capacity	Reservoir capacity	Number of wells	Number of wells	Cost	Cost
mD	MtCO2	MtCO2	#	#	$/tCO2	$/tCO2
1	26.7083	28.8951	60.4638	39.9798	39.8521	39.8521
2	29.2202	29.6052	34.597	34.8829	23.3028	26.8904
3	30.7567	30.1479	24.8787	31.1594	17.5163	21.603
4	31.7355	31.3944	19.5919	21.8596	14.5534	15.87
5	32.319	32.2751	16.2656	17.3943	12.7907	13.2605
6	32.9406	32.9658	13.9646	14.6121	11.1871	11.6675
7	33.6238	33.508	12.2708	12.6801	10.2551	10.5669
8	34.2101	33.9725	10.9677	11.2443	9.55147	9.71606
9	34.4466	34.3449	9.93172	10.1281	9.05016	9.11936
10	34.6412	34.5233	9.08674	9.2127	8.53648	8.6577
11	34.8029	34.7157	8.38339	8.46901	8.20362	8.27903
12	34.5158	34.8969	7.69393	7.83757	7.94678	7.95494
13	35.172	35.0727	7.24928	7.29232	7.65813	7.67924
14	35.3525	35.2468	6.7745	6.81486	7.4297	7.43533
15	35.5202	35.5072	6.36049	6.41066	7.158	7.21199
16	35.6735	35.6637	5.99614	6.03764	6.98407	7.01889
17	35.8179	35.81	5.67292	5.70765	6.83004	6.83949
18	35.9544	35.9473	5.38415	5.41351	6.69265	6.69214
19	36.0838	36.0774	5.12454	5.1496	6.53268	6.55936
20	36.2068	36.201	4.88983	4.91139	6.42128	6.43893
21	36.3241	36.3188	4.67656	4.69525	6.32014	6.32908
22	36.4361	36.4313	4.48188	4.49819	6.2279	6.23569
23	36.5433	36.5389	4.30343	4.31775	6.14341	6.15023
24	36.6461	36.6421	4.13924	4.15188	6.06571	6.07173
25	36.745	36.7412	3.98764	3.99886	5.994	5.99203
26	36.84	36.8366	3.84722	3.85723	5.92761	5.91775
27	36.9317	36.9285	3.71678	3.72573	5.82944	5.84829
28	37.0201	37.0171	3.59526	3.60331	5.77201	5.78312
29	37.1056	37.1028	3.48177	3.48904	5.71838	5.72181
30	37.1883	37.1857	3.37554	3.38212	5.66817	5.67128
31	37.2683	37.2659	3.27587	3.28186	5.62107	5.6239
32	37.346	37.3437	3.18218	3.18763	5.57679	5.57936
33	37.4213	37.4191	3.09392	3.09891	5.53507	5.53742
34	37.4945	37.4924	3.01064	3.01521	5.4957	5.49785
35	37.5656	37.5637	2.93192	2.93612	5.45847	5.46044
36	37.6348	37.633	2.85739	2.86126	5.42321	5.42503
37	37.7022	37.7005	2.78672	2.79029	5.38977	5.39144
38	37.7679	37.7662	2.71962	2.72292	5.358	5.35223
39	37.8319	37.8303	2.65581	2.65887	5.32778	5.31457
40	37.8943	37.914	2.59506	2.5979	5.26239	5.27689
41	37.9553	38.0064	2.53714	2.53979	5.23494	5.23986
42	38.1208	38.1075	2.48187	2.48434	5.20133	5.20342
43	38.2299	38.2172	2.42906	2.43137	5.17286	5.17482
44	38.3372	38.3354	2.37855	2.38071	5.14557	5.14669
45	38.4427	38.441	2.3302	2.33221	5.1194	5.12045
46	38.5466	38.545	2.28385	2.28574	5.09428	5.09526
47	38.6488	38.6473	2.2394	2.24117	5.07014	5.07106
48	38.7495	38.7481	2.19671	2.19838	5.04691	5.04778
49	38.8488	38.8474	2.1557	2.15727	5.02455	5.02537
50	38.9466	38.9452	2.11626	2.11774	5.00301	5.00378
51	39.043	39.0417	2.0783	2.0797	4.98223	4.98296
52	39.1381	39.1369	2.04174	2.04306	4.96218	4.96287
53	39.232	39.2307	2.0065	2.00775	4.94281	4.94346
54	39.3246	39.3234	1.97251	1.97369	4.92409	4.92471
55	39.416	39.4148	1.9397	1.94083	4.90599	4.90657
56	39.5063	39.5051	1.90802	1.90909	4.88846	4.88902
57	39.5954	39.5943	1.8774	1.87841	4.87149	4.87202
58	39.6835	39.6767	1.84779	1.84849	4.85504	4.85577
59	39.7705	39.7463	1.81915	1.81918	4.83909	4.84055
60	39.8276	39.7975	1.79011	1.79043	4.82478	4.82665
61	39.8547	39.8304	1.76144	1.76224	4.81234	4.81404
62	39.8512	39.8451	1.73368	1.73456	4.802	4.80268
63	39.8477	39.8478	1.7068	1.70763	4.79198	4.79229
64	39.8443	39.8444	1.68074	1.68154	4.78228	4.78257
65	39.841	39.841	1.65548	1.65624	4.77287	4.77315
66	39.8377	39.8377	1.63098	1.6317	4.76374	4.76401
67	39.8344	39.8345	1.60719	1.60789	4.75489	4.75514
68	39.8312	39.8313	1.5841	1.58477	4.74629	4.74654
69	39.828	39.8281	1.56167	1.56231	4.73794	4.73818
70	39.8249	39.825	1.53988	1.54049	4.72983	4.73005
71	39.8219	39.8219	1.51869	1.51927	4.72194	4.72216
72	39.8188	39.8189	1.49808	1.49864	4.71427	4.71448
73	39.8159	39.8159	1.47804	1.47857	4.70681	4.70701
74	39.8129	39.813	1.45852	1.45904	4.69955	4.69975
75	39.81	39.8101	1.43952	1.44002	4.69249	4.69267
76	39.8072	39.8072	1.42102	1.42149	4.68561	4.68578
77	39.8043	39.8044	1.40299	1.40345	4.6789	4.67907
78	39.8015	39.8016	1.38542	1.38586	4.67237	4.66523
79	39.7988	39.7988	1.36829	1.36871	4.666	4.65156
80	39.7961	39.7487	1.35158	1.3518	4.62329	4.64048
81	39.7934	39.6732	1.33527	1.33755	4.61723	4.63178
82	39.5539	39.5727	1.31846	1.32587	4.62354	4.62539
83	39.4239	39.4478	1.31413	1.31669	4.62883	4.62858
84	39.2964	39.2988	1.30988	1.30996	4.63406	4.634
85	39.1713	39.1735	1.30571	1.30578	4.63923	4.63917
86	39.0484	39.0505	1.30161	1.30168	4.64433	4.64427
87	38.9276	38.9297	1.29759	1.29766	4.64938	4.64932
88	38.809	38.811	1.29363	1.2937	4.65437	4.65432
89	38.6923	38.6942	1.28974	1.28981	4.65931	4.65925
90	38.5775	38.5794	1.28592	1.28598	4.66419	4.66414
91	38.4646	38.4663	1.28215	1.28221	4.66903	4.66898
92	38.3534	38.355	1.27845	1.2785	4.67382	4.67377
93	38.2438	38.2454	1.27479	1.27485	4.67856	4.67852
94	38.1358	38.1374	1.27119	1.27125	4.68327	4.68323
95	38.0294	38.0309	1.26765	1.2677	4.68793	4.68789
96	37.9244	37.9258	1.26415	1.26419	4.69255	4.69252
97	37.8208	37.8222	1.26069	1.26074	4.69714	4.69711
98	37.7186	37.7199	1.25729	1.25733	4.7017	4.70166
99	37.6176	37.6188	1.25392	1.25396	4.70622	4.70619
100	37.5178	37.519	1.25059	1.25063	4.71071	4.71068
101	37.4192	37.4203	1.24731	1.24734	4.71517	4.71515
102	37.3217	37.3227	1.24406	1.24409	4.71961	4.71958
103	37.2252	37.2262	1.24084	1.24087	4.72402	4.724
104	37.1297	37.1307	1.23766	1.23769	4.72841	4.72839
105	37.0352	37.0361	1.23451	1.23454	4.73278	4.73276
106	36.9416	36.9423	1.23139	1.23141	4.73712	4.73711
107	36.8489	36.8491	1.2283	1.2283	4.74145	4.74146
108	36.7563	36.7565	1.22521	1.22522	4.74579	4.74581
109	36.6637	36.6642	1.22212	1.22214	4.75016	4.75015
110	36.5718	36.5724	1.21906	1.21908	4.75451	4.7545
111	36.4805	36.4811	1.21602	1.21604	4.75886	4.75885
112	36.3898	36.3903	1.21299	1.21301	4.7632	4.7632
113	36.2996	36.3001	1.20999	1.21	4.76754	4.76754
114	36.2099	36.2104	1.207	1.20701	4.77188	4.77187
115	36.1207	36.1211	1.20402	1.20404	4.77621	4.77621
116	36.0319	36.0323	1.20106	1.20108	4.78054	4.78055
117	35.9435	35.9439	1.19812	1.19813	4.78488	4.78488
118	35.8555	35.8558	1.19518	1.19519	4.78922	4.78922
119	35.7678	35.7679	1.19226	1.19226	4.79356	4.79358
120	35.6804	35.68	1.18935	1.18933	4.79791	4.79796
121	35.592	35.5924	1.1864	1.18641	4.80234	4.80234
122	35.5043	35.505	1.18348	1.1835	4.80675	4.80673
123	35.4173	35.418	1.18058	1.1806	4.81114	4.81113
124	35.331	35.3317	1.1777	1.17772	4.81552	4.81551
125	35.2454	35.2461	1.17485	1.17487	4.81989	4.81987
126	35.1606	35.1612	1.17202	1.17204	4.82424	4.82423
127	35.0764	35.077	1.16921	1.16923	4.82858	4.82856
128	34.9928	34.9935	1.16643	1.16645	4.8329	4.83289
129	34.91	34.9106	1.16367	1.16369	4.83721	4.8372
130	34.8277	34.8284	1.16092	1.16095	4.84151	4.84149
131	34.7462	34.7468	1.15821	1.15823	4.84579	4.84578
132	34.6652	34.6659	1.15551	1.15553	4.85006	4.85005
133	34.5849	34.5856	1.15283	1.15285	4.85431	4.8543
134	34.5053	34.5059	1.15018	1.1502	4.85856	4.85854
135	34.4262	34.4268	1.14754	1.14756	4.86279	4.86277
136	34.3477	34.3483	1.14492	1.14494	4.867	4.86699
137	34.2698	34.2704	1.14233	1.14235	4.87121	4.87119
138	34.1925	34.1931	1.13975	1.13977	4.8754	4.87539
139	34.1158	34.1164	1.13719	1.13721	4.87958	4.87956
140	34.0396	34.0402	1.13465	1.13467	4.88374	4.88373
141	33.9641	33.9646	1.13214	1.13215	4.8879	4.88788
142	33.889	33.8896	1.12963	1.12965	4.89204	4.89203
143	33.8145	33.8151	1.12715	1.12717	4.89617	4.89616
144	33.7406	33.7411	1.12469	1.1247	4.90029	4.90028
145	33.6671	33.6677	1.12224	1.12226	4.90439	4.90438
146	33.5943	33.5948	1.11981	1.11983	4.90849	4.90848
147	33.5219	33.5224	1.1174	1.11741	4.91257	4.91256
148	33.45	33.4505	1.115	1.11502	4.91664	4.91663
149	33.3787	33.4146	1.11262	1.11382	4.9207	4.91867
150	33.3078	33.3788	1.11026	1.11263	4.92475	4.9207

## Sheet: Figure 7ab
Input Parameters
Parameter				Combinations
				Min	Max	Step
Depth (m):				1500	1500	10
Defined hydrostatic pressure (MPa):				-1	-1	1
Thickness (m):				20	20	1
Permeability (mD):				20	20	1
Porosity (fraction):				0.05	0.4	0.005
Geothermal gradient (°C):				25	25	0.1
Temperature (°C):				-1	-1	1
Area (km2):				256	256	100
Maximum injection pressure (as fraction):				0.8	0.8	0.8
Maximum well injection rate (MtCO2/yr):				1	1	1
Injection period (years):				30	30	1
Realizations:				-
Porosity	Injection rate	Plume radius	Plume volume	Storage potential of plume
fraction	MtCO2/yr	km	Mm3	MtCO2/km2
0.05	0.499939	7.49142	21.2438	0.0850668
0.055	0.499939	7.13811	21.2438	0.0936962
0.06	0.499939	6.84931	21.2438	0.101764
0.065	0.499939	6.5839	21.2438	0.110134
0.07	0.499939	6.34004	21.2438	0.118769
0.075	0.499939	6.11609	21.2438	0.127627
0.08	0.499939	5.91055	21.2438	0.136657
0.085	0.499939	5.74169	21.2438	0.144814
0.09	0.499939	5.58879	21.2438	0.152846
0.095	0.499939	5.44564	21.2438	0.160987
0.1	0.499939	5.3117	21.2438	0.169208
0.105	0.499939	5.18646	21.2438	0.177479
0.11	0.499939	5.06946	21.2438	0.185765
0.115	0.499939	4.96027	21.2438	0.194034
0.12	0.499939	4.8585	21.2438	0.202248
0.125	0.499939	4.76378	21.2438	0.210371
0.13	0.499939	4.67578	21.2438	0.218363
0.135	0.499939	4.5942	21.2438	0.226187
0.14	0.499939	4.51876	21.2438	0.233803
0.145	0.499939	4.45043	21.2438	0.241037
0.15	0.499939	4.38793	21.2438	0.247952
0.155	0.499939	4.32737	21.2438	0.254942
0.16	0.499939	4.26867	21.2438	0.262001
0.165	0.499939	4.2118	21.2438	0.269125
0.17	0.499939	4.15669	21.2438	0.276308
0.175	0.499939	4.1033	21.2438	0.283545
0.18	0.499939	4.05158	21.2438	0.290831
0.185	0.499939	4.00148	21.2438	0.298159
0.19	0.499939	3.95296	21.2438	0.305523
0.195	0.499939	3.90598	21.2438	0.312916
0.2	0.499939	3.8605	21.2438	0.320333
0.205	0.499939	3.81647	21.2438	0.327767
0.21	0.499939	3.77386	21.2438	0.335209
0.215	0.499939	3.73264	21.2438	0.342655
0.22	0.499939	3.69276	21.2438	0.350096
0.225	0.499939	3.65419	21.2438	0.357524
0.23	0.499939	3.61691	21.2438	0.364933
0.235	0.499939	3.58088	21.2438	0.372314
0.24	0.499939	3.54606	21.2438	0.37966
0.245	0.499939	3.51244	21.2438	0.386963
0.25	0.499939	3.47999	21.2438	0.394215
0.255	0.499939	3.44867	21.2438	0.401408
0.26	0.499939	3.41846	21.2438	0.408534
0.265	0.499939	3.38934	21.2438	0.415583
0.27	0.499939	3.36129	21.2438	0.42255
0.275	0.499939	3.33427	21.2438	0.429424
0.28	0.499939	3.30828	21.2438	0.436198
0.285	0.499939	3.28329	21.2438	0.442864
0.29	0.499939	3.25928	21.2438	0.449413
0.295	0.499939	3.23623	21.2438	0.455837
0.3	0.499939	3.21412	21.2438	0.462129
0.305	0.499939	3.19294	21.2438	0.46828
0.31	0.499939	3.17268	21.2438	0.474283
0.315	0.499939	3.1533	21.2438	0.480129
0.32	0.499939	3.13453	21.2438	0.485896
0.325	0.499939	3.11132	21.2438	0.493172
0.33	0.499939	3.08873	21.2438	0.500413
0.335	0.499939	3.06674	21.2438	0.507614
0.34	0.499939	3.04536	21.2438	0.514769
0.345	0.499939	3.02455	21.2438	0.521875
0.35	0.499939	3.00432	21.2438	0.528926
0.355	0.499939	2.98466	21.2438	0.535917
0.36	0.499939	2.96556	21.2438	0.542845
0.365	0.499939	2.947	21.2438	0.549703
0.37	0.499939	2.92898	21.2438	0.556486
0.375	0.499939	2.9115	21.2438	0.563191
0.38	0.499939	2.89453	21.2438	0.569813
0.385	0.499939	2.87808	21.2438	0.576345
0.39	0.499939	2.86214	21.2438	0.582784
0.395	0.499939	2.84669	21.2438	0.589125
0.4	0.499939	2.83174	21.2438	0.595364

[truncated: 4 more sheets: Figure 7cd, Figure 8, Figure 9, Figure 10]
